# Supplementary material for: Influence of ancillary ligands on the photophysical properties of cyclometalated organoplatinum(ii) complexes
Source: Royal Society of Chemistry journal article supplement (doi:10.1039/c7nj04888b), 2018-01-01

## SUPPORTING INFORMATION

### **Influence of Ancillary Ligands on Photophysical Properties of Cyclometalated Organoplatinum(II) Complexes**

Mozhgan Samandar,<sup>a</sup> Mohsen Golbon Haghighi,<sup>\*b</sup>

S. Masoud Nabavizadeh,<sup>a</sup> Arno Pfitzner<sup>c</sup> and Mehdi Rashidi <sup>\*a</sup>

<sup>a</sup> Professor Rashidi Laboratory of Organometallic Chemistry, Department of Chemistry, College of Sciences, Shiraz University, Shiraz 71467-13565, Iran

<sup>b</sup> Department of Chemistry, Shahid Beheshti University, Evin, Tehran 19839-69411, Iran

<sup>c</sup> Institut für Anorganische Chemie, Universität Regensburg, Universitätstarsse 31, Regensburg D-93053, Germany

E-mails: [m\\_golbon@sbu.ac.ir](mailto:m_golbon@sbu.ac.ir) (M.G.H.)

# 1. DFT and TDDFT calculations

## 1.1. Complex 1a

**Table S1.** Fragment contributions (%; from atomic orbital contributions) to the frontier orbitals of [Pt(*p*-Me-C<sub>6</sub>H<sub>4</sub>)(bhq)(PPh<sub>3</sub>)], **1a** in CH<sub>2</sub>Cl<sub>2</sub> solution.

| Energies(eV) | number  | Pt | PPh <sub>3</sub> | Bhq | <i>P</i> -tol |
|--------------|---------|----|------------------|-----|---------------|
| -0.324       | LUMO+6  | 4  | 78               | 16  | 2             |
| -0.453       | LUMO+5  | 5  | 85               | 8   | 2             |
| -0.612       | LUMO+4  | 13 | 80               | 6   | 1             |
| -0.688       | LUMO+3  | 6  | 87               | 6   | 1             |
| -0.987       | LUMO+2  | 4  | 91               | 4   | 1             |
| -1.157       | LUMO+1  | 3  | 9                | 87  | 1             |
| -1.695       | LUMO    | 3  | 2                | 94  | 1             |
| -5.507       | HOMO    | 24 | 5                | 10  | 61            |
| -5.621       | HOMO-1  | 30 | 3                | 67  | 0             |
| -5.861       | HOMO-2  | 82 | 2                | 6   | 10            |
| -6.186       | HOMO-3  | 42 | 1                | 41  | 16            |
| -6.307       | HOMO-4  | 18 | 3                | 7   | 72            |
| -6.436       | HOMO-5  | 11 | 57               | 30  | 2             |
| -6.515       | HOMO-6  | 54 | 1                | 39  | 6             |
| -6.812       | HOMO-7  | 49 | 6                | 44  | 1             |
| -6.912       | HOMO-8  | 2  | 93               | 3   | 2             |
| -6.996       | HOMO-9  | 8  | 85               | 5   | 2             |
| -7.097       | HOMO-10 | 6  | 87               | 4   | 3             |
| -7.162       | HOMO-11 | 4  | 94               | 2   | 0             |

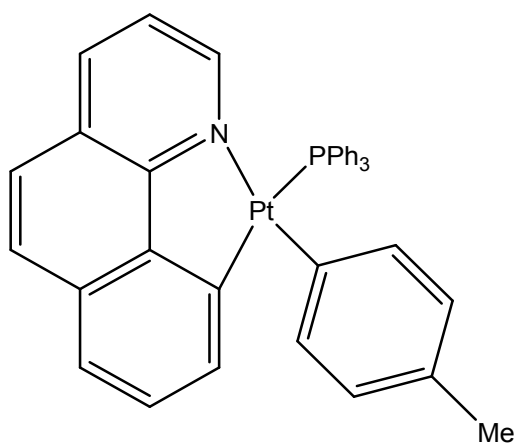

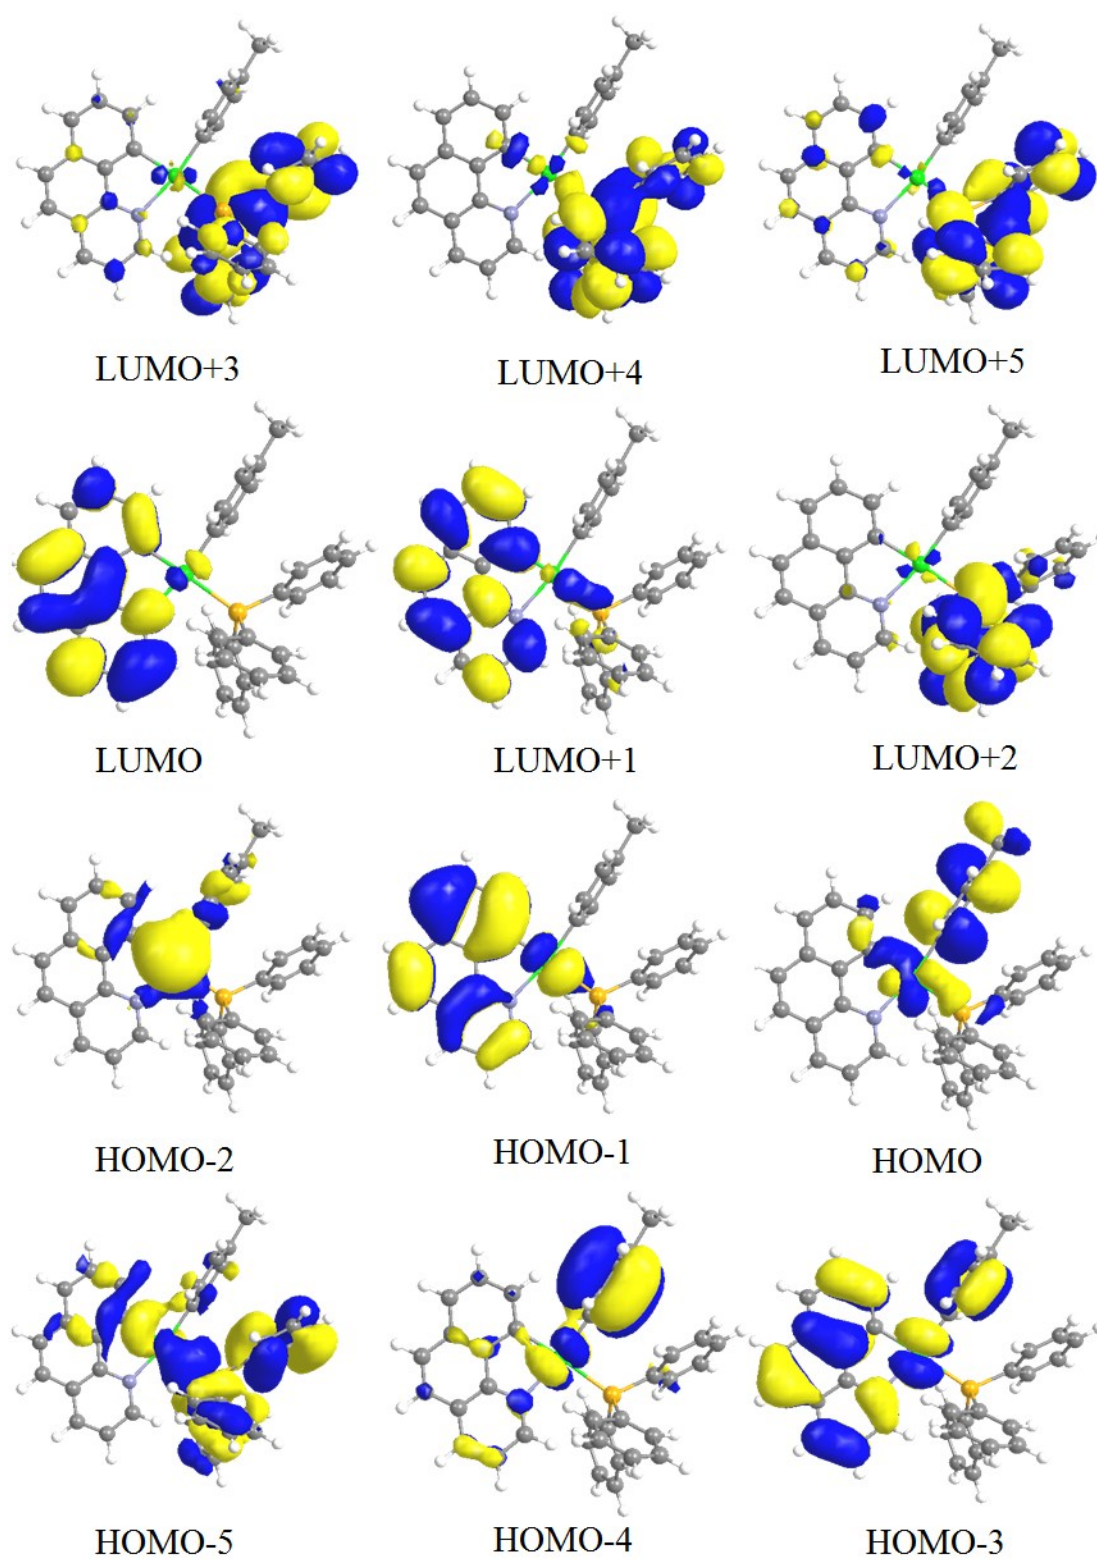

**Figure S1.** Qualitative frontier molecular orbitals for complex **1a**.

**Table S2.** Fragment contributions (%; from atomic orbital contributions) to the frontier orbitals of [Pt(*p*-Me-C<sub>6</sub>H<sub>4</sub>)(bhq)(PPh<sub>3</sub>)], **1a** in gas phase.

| Energies(eV) | number  | Pt | PPh <sub>3</sub> | Bhq | <i>P</i> -tol |
|--------------|---------|----|------------------|-----|---------------|
| -0.250       | LUMO+6  | 3  | 89               | 7   | 1             |
| -0.316       | LUMO+5  | 5  | 90               | 4   | 1             |
| -0.502       | LUMO+4  | 11 | 82               | 5   | 2             |
| -0.624       | LUMO+3  | 2  | 92               | 5   | 1             |
| -0.918       | LUMO+2  | 3  | 84               | 12  | 1             |
| -0.962       | LUMO+1  | 4  | 30               | 65  | 1             |
| -1.756       | LUMO    | 2  | 1                | 96  | 1             |
| -5.077       | HOMO    | 23 | 4                | 28  | 45            |
| -5.106       | HOMO-1  | 21 | 4                | 54  | 21            |
| -5.492       | HOMO-2  | 79 | 2                | 9   | 10            |
| -5.779       | HOMO-3  | 24 | 3                | 19  | 54            |
| -5.881       | HOMO-4  | 42 | 1                | 28  | 29            |
| -6.159       | HOMO-5  | 65 | 2                | 27  | 6             |
| -6.240       | HOMO-6  | 11 | 55               | 32  | 2             |
| -6.558       | HOMO-7  | 39 | 4                | 57  | 0             |
| -6.708       | HOMO-8  | 2  | 94               | 2   | 2             |
| -6.857       | HOMO-9  | 29 | 30               | 19  | 22            |
| -7.005       | HOMO-10 | 8  | 61               | 12  | 19            |
| -7.084       | HOMO-11 | 11 | 65               | 9   | 15            |

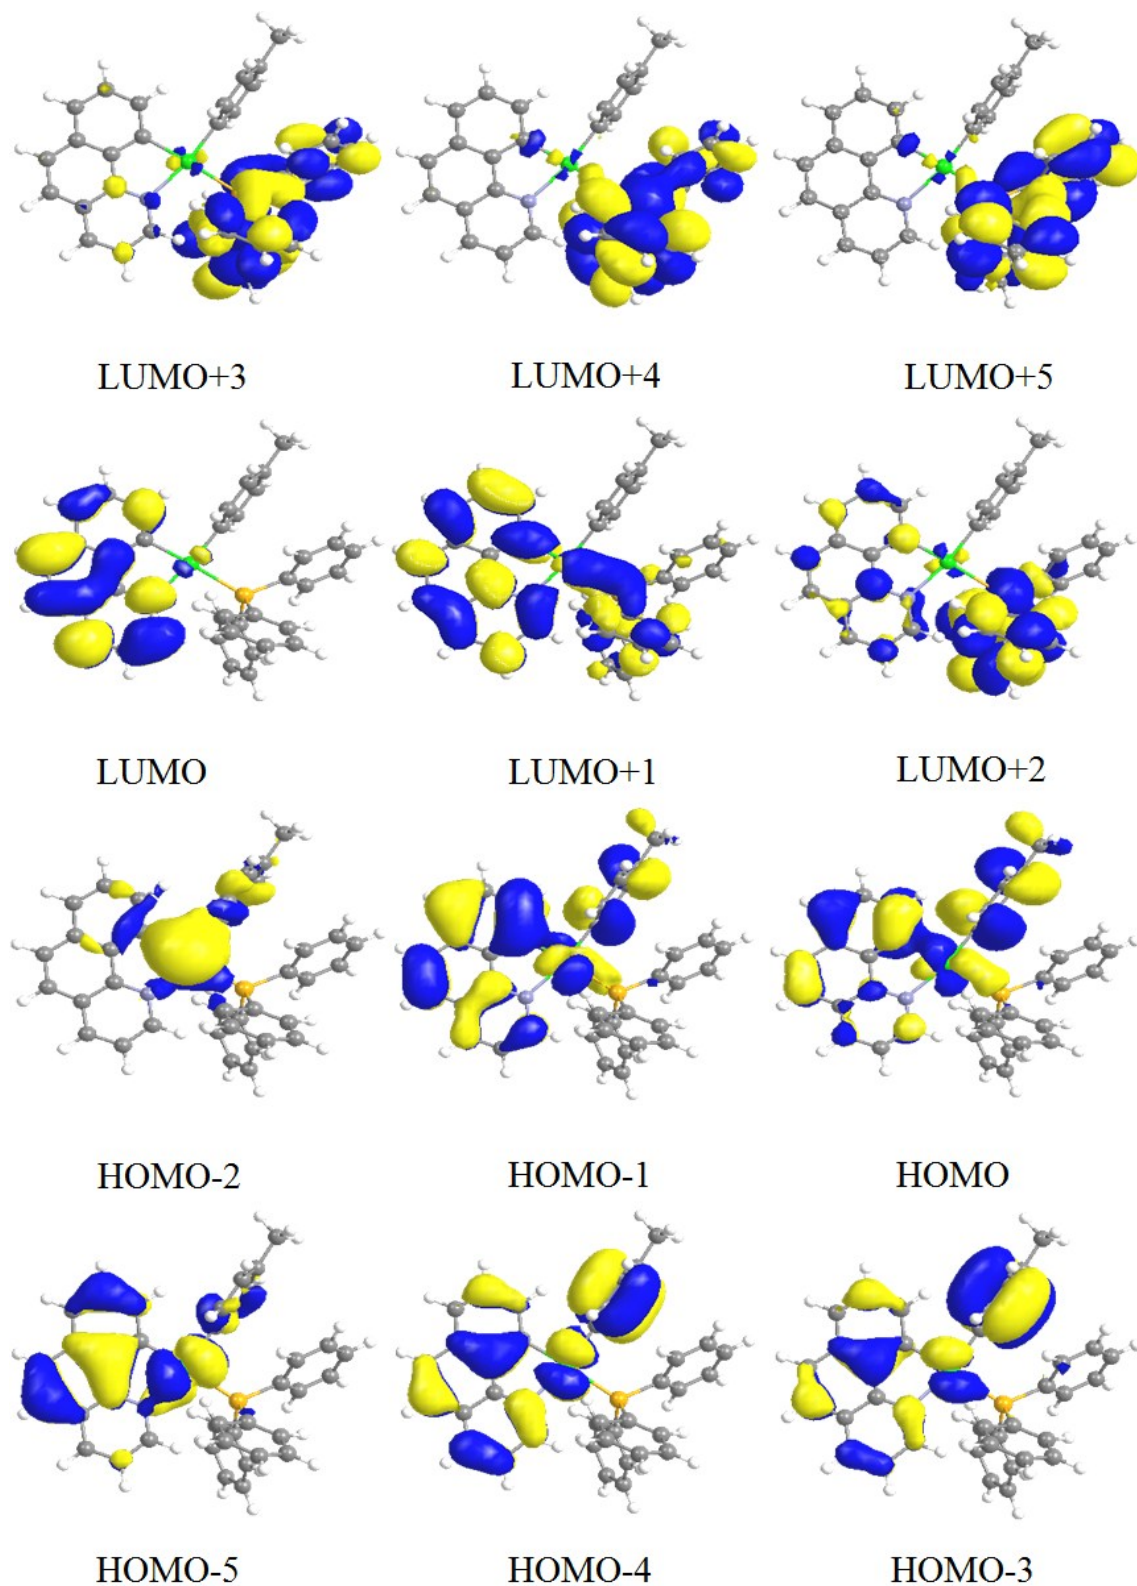

**Figure S2.** Qualitative frontier molecular orbitals for complex **1a** in gas phase.

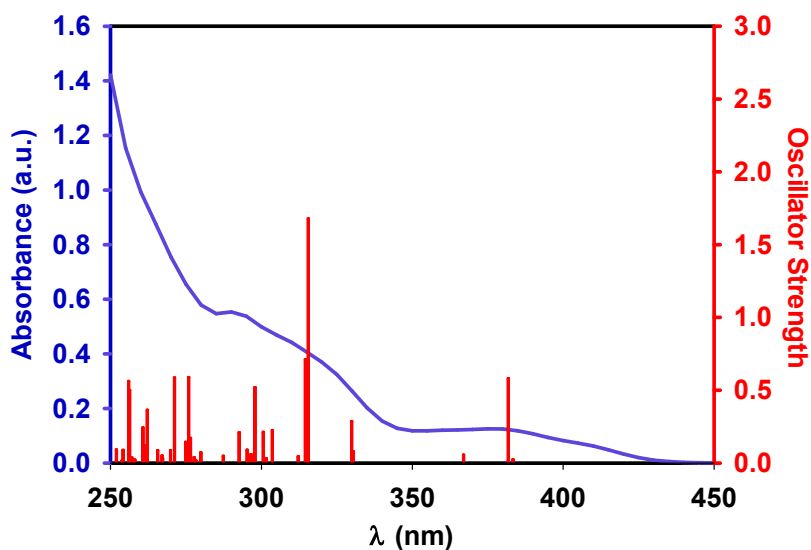

**Figure S3.** Experimental UV-vis spectra in  $\text{CH}_2\text{Cl}_2$  ( $10^{-5}$  M) at 298 K and calculated absorption spectra, showing by bars, in  $\text{CH}_2\text{Cl}_2$  for the complex **1a**.

**Table S3.** Selected vertical singlet excitations of **1a** from TDDFT calculations at the ground state geometry in  $\text{CH}_2\text{Cl}_2$  solution ( $10^{-5}$ ).

| state | Monoexcitations <sup>a</sup>                                 | $\Delta$<br>E/eV | $\lambda_{\text{cal}}/\text{nm}$ | oscillator<br>strength |     | main character |
|-------|--------------------------------------------------------------|------------------|----------------------------------|------------------------|-----|----------------|
| S1    | H→L (73%)<br>H-1→L (19%)                                     | 3.238            | 383                              | 0.0022                 |     | MLCT/LC/LLCT   |
| S2    | H-1→L (75%)<br>H→L (19%)                                     | 3.251            | 381                              | 0.0579                 | 19% | MLCT/LC/LLCT   |
| S3    | H-2→L (92%)                                                  | 3.382            | 366                              | 0.0054                 |     | MLCT/LLCT      |
| S4    | H→L+1 (77%)<br>H-3→L (10%)                                   | 3.757            | 330                              | 0.0078                 |     | MLCT/LC/LLCT   |
| S5    | H-3→L (41%)<br>H-1→L+1 (30%)<br>H→L+1 (17%)                  | 3.763            | 329                              | 0.0285                 |     | MLCT/LC/LLCT   |
| S6    | H-1→L+1 (33%)<br>H-2→L+1 (25%)<br>H-3→L (16%)<br>H-6→L (14%) | 3.933            | 315                              | 0.1677                 |     | MLCT/LC/LLCT   |
| S7    | H-2→L+1 (68%)<br>H-1→L+1 (13%)                               | 3.946            | 314                              | 0.0708                 |     | MLCT/LC/LLCT   |
| S8    | H→L+2 (94%)                                                  | 3.976            | 312                              | 0.0043                 |     | MLCT/LLCT      |
| S9    | H-4→L (35%)<br>H-6→L (27%)<br>H-3→L (18%)                    | 4.088            | 303                              | 0.0223                 |     | MLCT/LC/LLCT   |
| S12   | H-4→L (39%)<br>H-3→L+1 (16%)<br>H-6→L (15%)                  | 4.167            | 298                              | 0.052                  |     | MLCT/LC/LLCT   |
| S14   | H→L+3 (60%)                                                  | 4.202            | 295                              | 0.0088                 |     | MLCT/LLCT      |

|     |                                                            |       |     |        |  |              |
|-----|------------------------------------------------------------|-------|-----|--------|--|--------------|
|     | H-2→L+2 (18%)<br>H→L+4 (14%)                               |       |     |        |  |              |
| S15 | H-3→L+1 (29%)<br>H-7→L (24%)<br>H-6→L (18%)<br>H-4→L (10%) | 4.240 | 292 | 0.0208 |  | MLCT/LC/LLCT |
| S16 | H→L+4 (72%)<br>H→L+3 (21%)                                 | 4.318 | 287 | 0.0046 |  | MLCT/LLCT    |
| S20 | H-2→L+3 (45%)<br>H-2→L+4 (19%)<br>H→L+5 (16%)              | 4.487 | 276 | 0.017  |  | MLCT/LLCT    |
| S21 | H-6→L+1 (38%)<br>H-7→L (22%)<br>H-2→L+3 (12%)              | 4.497 | 275 | 0.059  |  | MLCT/LC/LLCT |

**Table S4.** Lowest-energy vertical triplet excitations of **1a** from TDDFT calculations in gas phase.

| state | Monoexcitations <sup>a</sup>                               | $\Delta E/eV$ | $\lambda_{cal}/nm$ | main character |
|-------|------------------------------------------------------------|---------------|--------------------|----------------|
| T1    | H-1→L (47%)<br>H→L (25%)                                   | 1.935         | 641                | MLCT/LC/LLCT   |
| T2    | H-1→L+1 (28%)<br>H-1→L (15%)<br>H→L+1 (13%)<br>H-4→L (10%) | 2.709         | 458                | MLCT/LC/LLCT   |
| T3    | H→L (58%)<br>H-1→L (33%)                                   | 2.780         | 446                | MLCT/LC/LLCT   |
| T4    | H-4→L (32%)<br>H-3→L (22%)<br>H-1→L+1 (17%)                | 2.864         | 433                | MLCT/LC/LLCT   |
| T5    | H-2→L (91%)                                                | 2.941         | 422                | MLCT/LC/LLCT   |

## 1.2. Complex 1b

**Table S5.** Fragment contributions (%; from atomic orbital contributions) to the frontier orbitals of [Pt(*p*-Me-C<sub>6</sub>H<sub>4</sub>)(bhq)(PPh<sub>2</sub>Me)], **1b** in CH<sub>2</sub>Cl<sub>2</sub> solution.

| Energies(eV) | number  | Pt | PPh <sub>2</sub> Me | Bhq | <i>P</i> -tol |
|--------------|---------|----|---------------------|-----|---------------|
| -0.155       | LUMO+6  | 4  | 45                  | 48  | 3             |
| -0.286       | LUMO+5  | 6  | 67                  | 25  | 2             |
| -0.422       | LUMO+4  | 5  | 85                  | 8   | 1             |
| -0.604       | LUMO+3  | 9  | 83                  | 7   | 1             |
| -0.866       | LUMO+2  | 3  | 93                  | 2   | 2             |
| -1.152       | LUMO+1  | 3  | 7                   | 89  | 1             |
| -1.685       | LUMO    | 3  | 2                   | 94  | 1             |
| -5.550       | HOMO    | 25 | 6                   | 9   | 60            |
| -5.618       | HOMO-1  | 29 | 3                   | 68  | 0             |
| -5.865       | HOMO-2  | 83 | 2                   | 7   | 8             |
| -6.192       | HOMO-3  | 46 | 1                   | 46  | 7             |
| -6.357       | HOMO-4  | 15 | 3                   | 2   | 80            |
| -6.513       | HOMO-5  | 45 | 8                   | 40  | 7             |
| -6.599       | HOMO-6  | 22 | 41                  | 35  | 2             |
| -6.809       | HOMO-7  | 50 | 6                   | 43  | 1             |
| -7.044       | HOMO-8  | 1  | 96                  | 2   | 1             |
| -7.101       | HOMO-9  | 2  | 95                  | 2   | 1             |
| -7.154       | HOMO-10 | 5  | 79                  | 7   | 9             |
| -7.278       | HOMO-11 | 18 | 38                  | 23  | 21            |

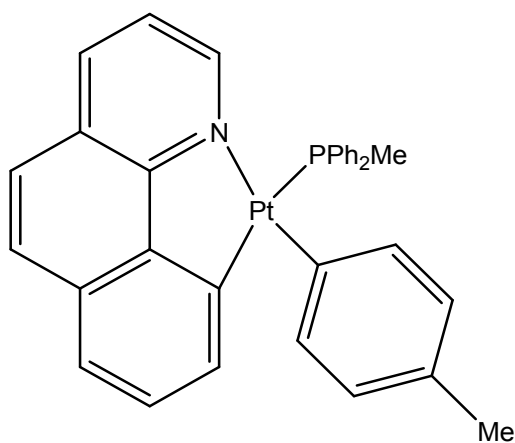



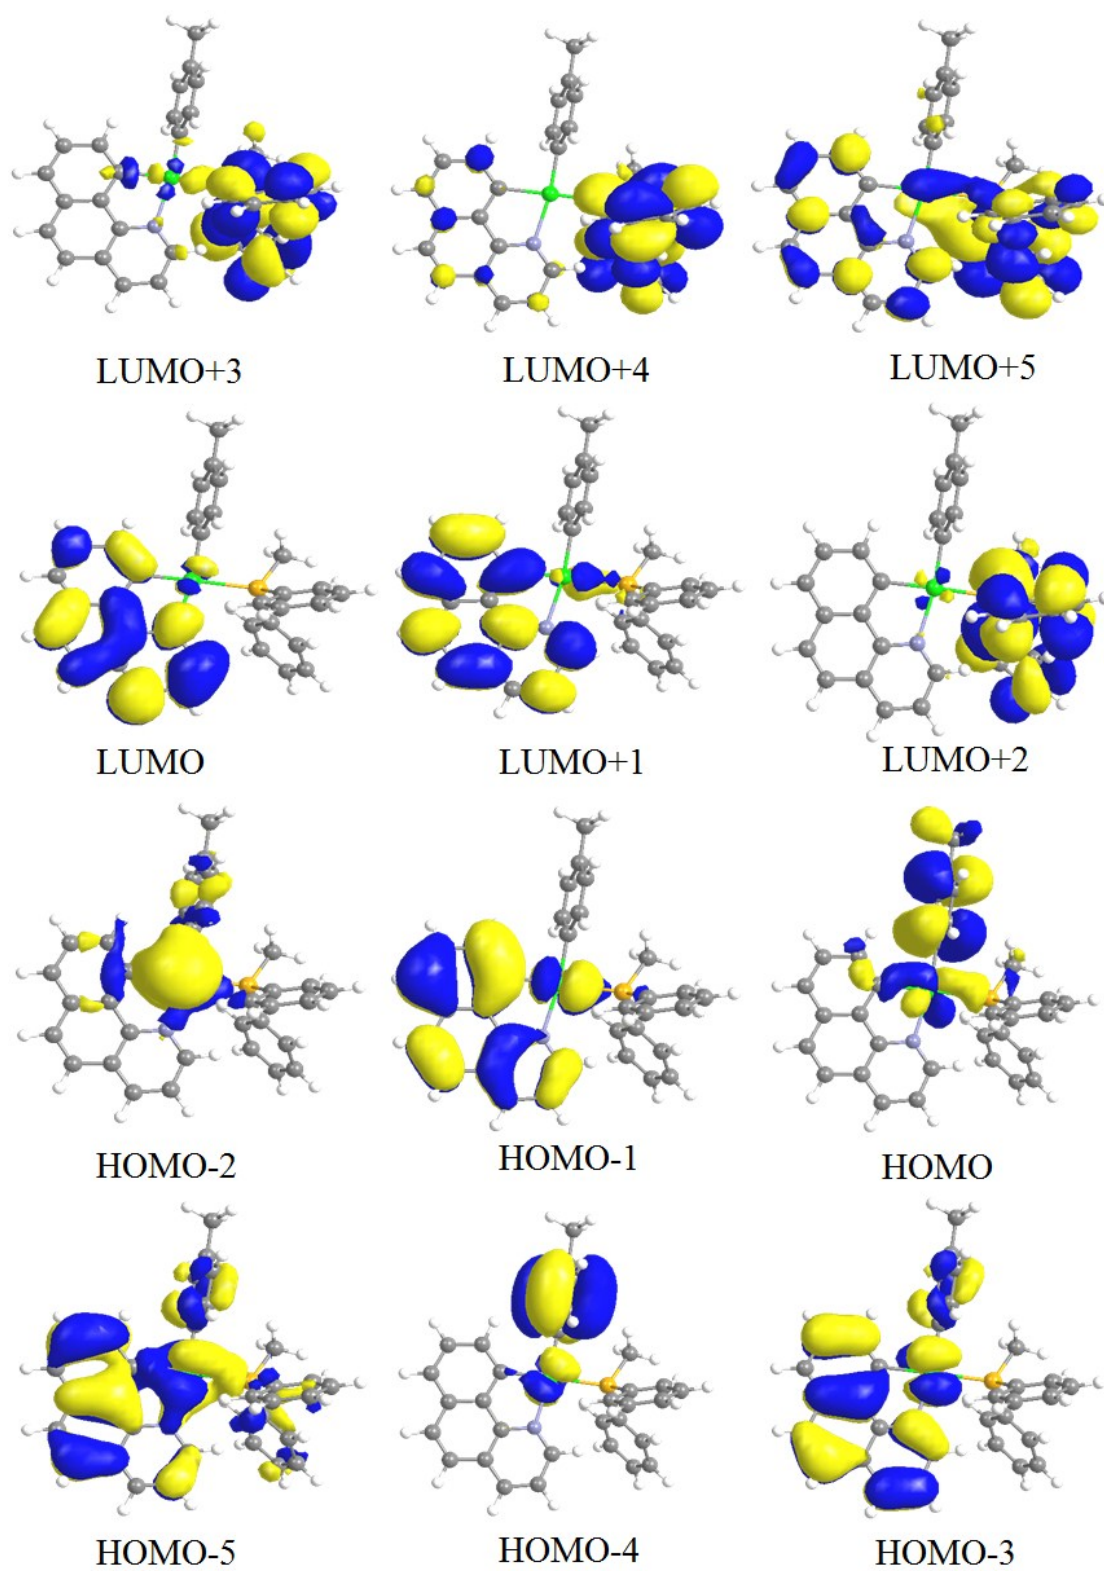

**Figure S4.** Qualitative frontier molecular orbitals for complex **1b**.

**Table S6.** Fragment contributions (%; from atomic orbital contributions) to the frontier orbitals of [Pt(*p*-Me-C<sub>6</sub>H<sub>4</sub>)(bhq)(PPh<sub>2</sub>Me)], **1b** in gas phase.

| Energies(eV) | number  | Pt | PPh <sub>2</sub> Me | Bhq | <i>P</i> -tol |
|--------------|---------|----|---------------------|-----|---------------|
| 0.089        | LUMO+6  | 4  | 12                  | 80  | 4             |
| -0.249       | LUMO+5  | 3  | 94                  | 3   | 0             |
| -0.414       | LUMO+4  | 6  | 89                  | 5   | 1             |
| -0.561       | LUMO+3  | 5  | 88                  | 6   | 1             |
| -0.858       | LUMO+2  | 2  | 93                  | 4   | 1             |
| -0.967       | LUMO+1  | 4  | 14                  | 81  | 1             |
| -1.772       | LUMO    | 2  | 1                   | 96  | 1             |
| -5.113       | HOMO    | 20 | 3                   | 77  | 0             |
| -5.163       | HOMO-1  | 23 | 5                   | 10  | 62            |
| -5.511       | HOMO-2  | 80 | 2                   | 9   | 9             |
| -5.833       | HOMO-3  | 44 | 1                   | 36  | 19            |
| -5.937       | HOMO-4  | 23 | 2                   | 9   | 66            |
| -6.187       | HOMO-5  | 64 | 2                   | 28  | 6             |
| -6.462       | HOMO-6  | 16 | 41                  | 41  | 2             |
| -6.573       | HOMO-7  | 40 | 3                   | 57  | 0             |
| -6.988       | HOMO-8  | 21 | 17                  | 23  | 39            |
| -7.055       | HOMO-9  | 1  | 93                  | 3   | 3             |
| -7.100       | HOMO-10 | 1  | 95                  | 2   | 2             |
| -7.174       | HOMO-11 | 50 | 19                  | 13  | 18            |

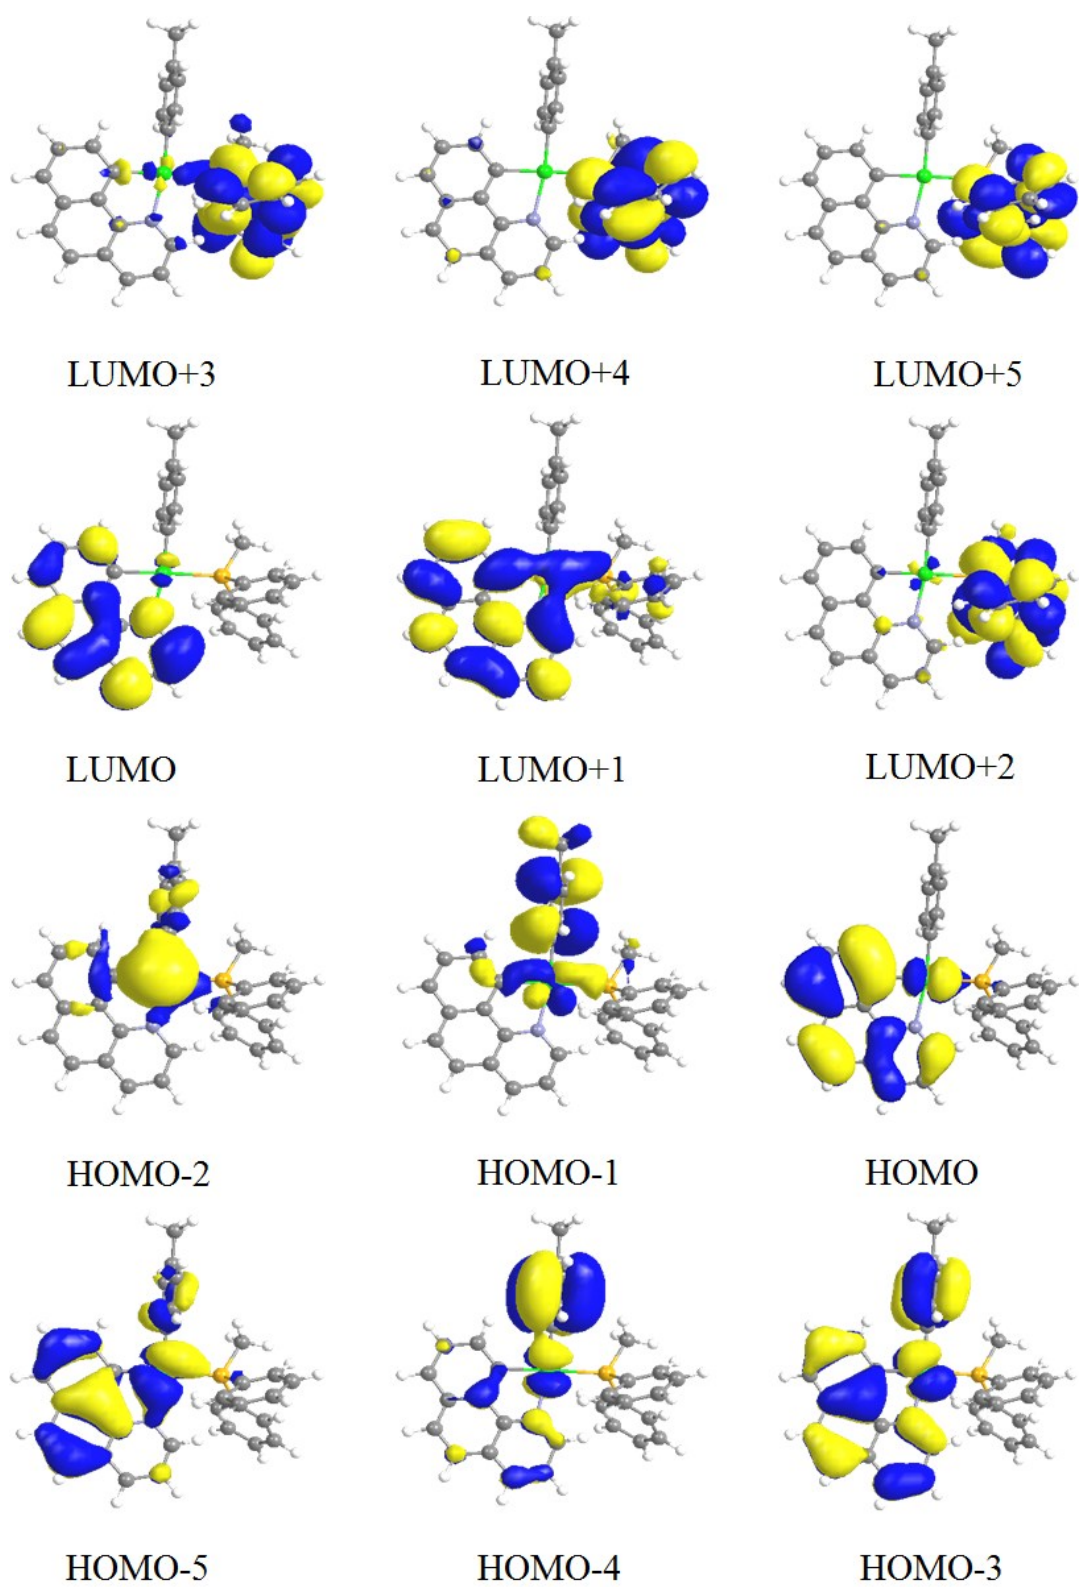

**Figure S5.** Qualitative frontier molecular orbitals for complex **1b** in gas phase.

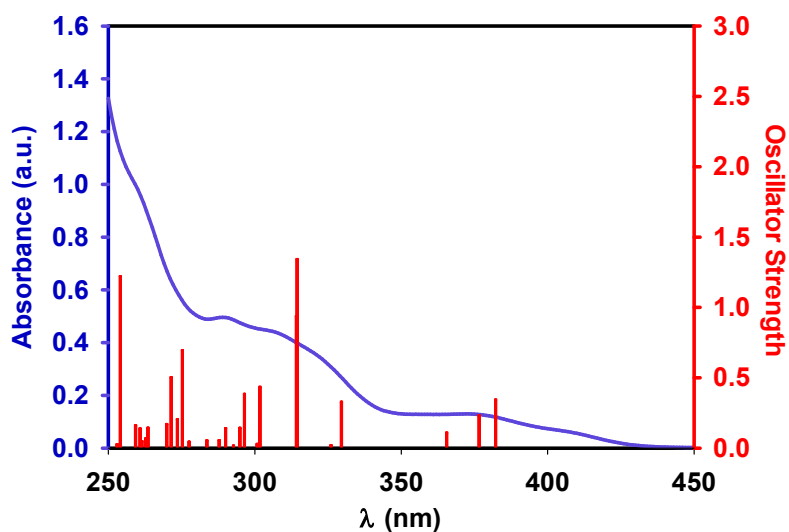

**Figure S6.** Experimental UV-vis spectra in  $\text{CH}_2\text{Cl}_2$  ( $10^{-5}$  M) at 298 K and calculated absorption spectra, showing by bars, in  $\text{CH}_2\text{Cl}_2$  for the complex **1b**.

**Table S7.** Selected vertical singlet excitations of **1b** from TDDFT calculations at the ground state geometry in  $\text{CH}_2\text{Cl}_2$  solution ( $10^{-5}$ ).

| state | Monoexcitations <sup>a</sup>                               | $\Delta E/\text{eV}$ | $\lambda_{\text{cal}}/\text{nm}$ | oscillator strength | main character |
|-------|------------------------------------------------------------|----------------------|----------------------------------|---------------------|----------------|
| S1    | H-1→L (79%)<br>H→L (16%)                                   | 3.248                | 382                              | 0.0342              | MLCT/LC/LLCT   |
| S2    | H→L (73%)<br>H-1→L (14%)<br>H-2→L (11%)                    | 3.296                | 376                              | 0.0231              | MLCT/LC/LLCT   |
| S3    | H-2→L (87%)                                                | 3.396                | 365                              | 0.0107              | MLCT           |
| S4    | H-3→L (50%)<br>H-1→L+1 (38%)                               | 3.766                | 329                              | 0.0326              | MLCT/LC        |
| S5    | H-2→L+1 (38%)<br>H-1→L+1 (26%)<br>H-3→L (19%)              | 3.807                | 314                              | 0.1341              | MLCT/LC        |
| S7    | H-2→L+1 (56%)<br>H-1→L+1 (19%)                             | 3.950                | 314                              | 0.0935              | MLCT/LC        |
| S8    | H-5→L (38%)<br>H-4→L (22%)<br>H-3→L (13%)                  | 4.113                | 301                              | 0.0432              | MLCT/LC/LLCT   |
| S10   | H-6→L (28%)<br>H-4→L (28%)<br>H-3→L+1 (26%)                | 4.186                | 296                              | 0.0382              | MLCT/LC/LLCT   |
| S11   | H-6→L (63%)                                                | 4.208                | 295                              | 0.0141              | MLCT/LC/LLCT   |
| S13   | H-4→L (29%)<br>H-5→L (23%)<br>H-3→L+1 (19%)<br>H-7→L (16%) | 4.279                | 290                              | 0.014               | MLCT/LC/LLCT   |
| S17   | H-5→L+1 (37%)<br>H-7→L (22%)                               | 4.508                | 275                              | 0.069               | MLCT/LC        |

|     |                                                 |       |     |        |              |
|-----|-------------------------------------------------|-------|-----|--------|--------------|
|     | H-3→L+1 (10%)                                   |       |     |        |              |
| S18 | H-2→L+3 (80%)                                   | 4.536 | 273 | 0.0203 | MLCT         |
| S19 | H-7→L (28%)<br>H-1→L+4 (10%)<br>H-1→L+5 (10%)   | 4.571 | 271 | 0.0502 | MLCT/LC/LLCT |
| S20 | H→L+4 (72%)<br>H→L+5 (11%)                      | 4.597 | 270 | 0.017  | MLCT/LC/LLCT |
| S21 | H-6→L+1 (18%)<br>H-4→L+1 (63%)                  | 4.708 | 263 | 0.014  | MLCT/LC/LLCT |
| S25 | H-1→L+4 (53%)<br>H-5→L+1 (10%)<br>H-4→L+1 (10%) | 4.757 | 261 | 0.014  | MLCT/LC/LLCT |
| S27 | H-2→L+4 (47%)<br>H-2→L+5 (18%)                  | 4.785 | 259 | 0.016  | MLCT         |

**Table S8.** Lowest-energy vertical triplet excitations of **1b** from TDDFT calculations in gas phase.

| state | Monoexcitations <sup>a</sup>                             | $\Delta E/eV$ | $\lambda_{cal}/nm$ | main character |
|-------|----------------------------------------------------------|---------------|--------------------|----------------|
| T1    | H→L (71%)<br>H-3→L (10%)                                 | 1.935         | 641                | MLCT/LC/LLCT   |
| T2    | H→L+1 (41%)<br>H→L (24%)<br>H-3→L (19%)                  | 2.706         | 458                | MLCT/LC/LLCT   |
| T3    | H-1→L (59%)<br>H→L+1 (18%)<br>H-3→L (12%)                | 2.818         | 440                | MLCT/LC/LLCT   |
| T4    | H-3→L (28%)<br>H-1→L (24%)<br>H-2→L (17%)<br>H→L+1 (17%) | 2.873         | 432                | MLCT/LC/LLCT   |
| T5    | H-2→L (77%)<br>H-1→L (13%)                               | 2.950         | 420                | MLCT/LC/LLCT   |

### 1.3. Complex 1c

**Table S9.** Fragment contributions (%; from atomic orbital contributions) to the frontier orbitals of [Pt(*p*-Me-C<sub>6</sub>H<sub>4</sub>)(bhq)(PPhMe<sub>2</sub>)], **1c** in CH<sub>2</sub>Cl<sub>2</sub> solution.

| Energies(eV) | number  | Pt | PPhMe <sub>2</sub> | Bhq | <i>P</i> -tol |
|--------------|---------|----|--------------------|-----|---------------|
| 0.373        | LUMO+6  | 21 | 24                 | 31  | 24            |
| 0.350        | LUMO+5  | 16 | 8                  | 14  | 62            |
| -0.222       | LUMO+4  | 8  | 24                 | 63  | 5             |
| -0.341       | LUMO+3  | 6  | 79                 | 14  | 1             |
| -0.710       | LUMO+2  | 4  | 90                 | 5   | 1             |
| -1.154       | LUMO+1  | 4  | 6                  | 89  | 1             |
| -1.696       | LUMO    | 3  | 2                  | 94  | 1             |
| -5.536       | HOMO    | 24 | 6                  | 10  | 60            |
| -5.611       | HOMO-1  | 30 | 3                  | 67  | 0             |
| -5.863       | HOMO-2  | 84 | 1                  | 7   | 8             |
| -6.178       | HOMO-3  | 49 | 0                  | 44  | 7             |
| -6.346       | HOMO-4  | 14 | 2                  | 2   | 82            |
| -6.515       | HOMO-5  | 50 | 1                  | 42  | 7             |
| -6.699       | HOMO-6  | 16 | 39                 | 43  | 2             |
| -6.814       | HOMO-7  | 51 | 4                  | 44  | 1             |
| -7.071       | HOMO-8  | 2  | 95                 | 2   | 1             |
| -7.141       | HOMO-9  | 11 | 58                 | 19  | 12            |
| -7.393       | HOMO-10 | 22 | 16                 | 28  | 34            |
| -7.556       | HOMO-11 | 52 | 4                  | 14  | 30            |

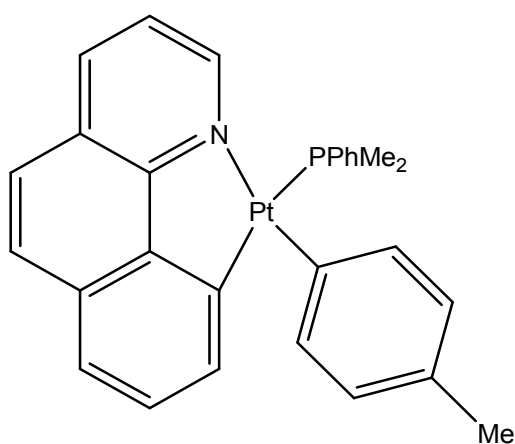

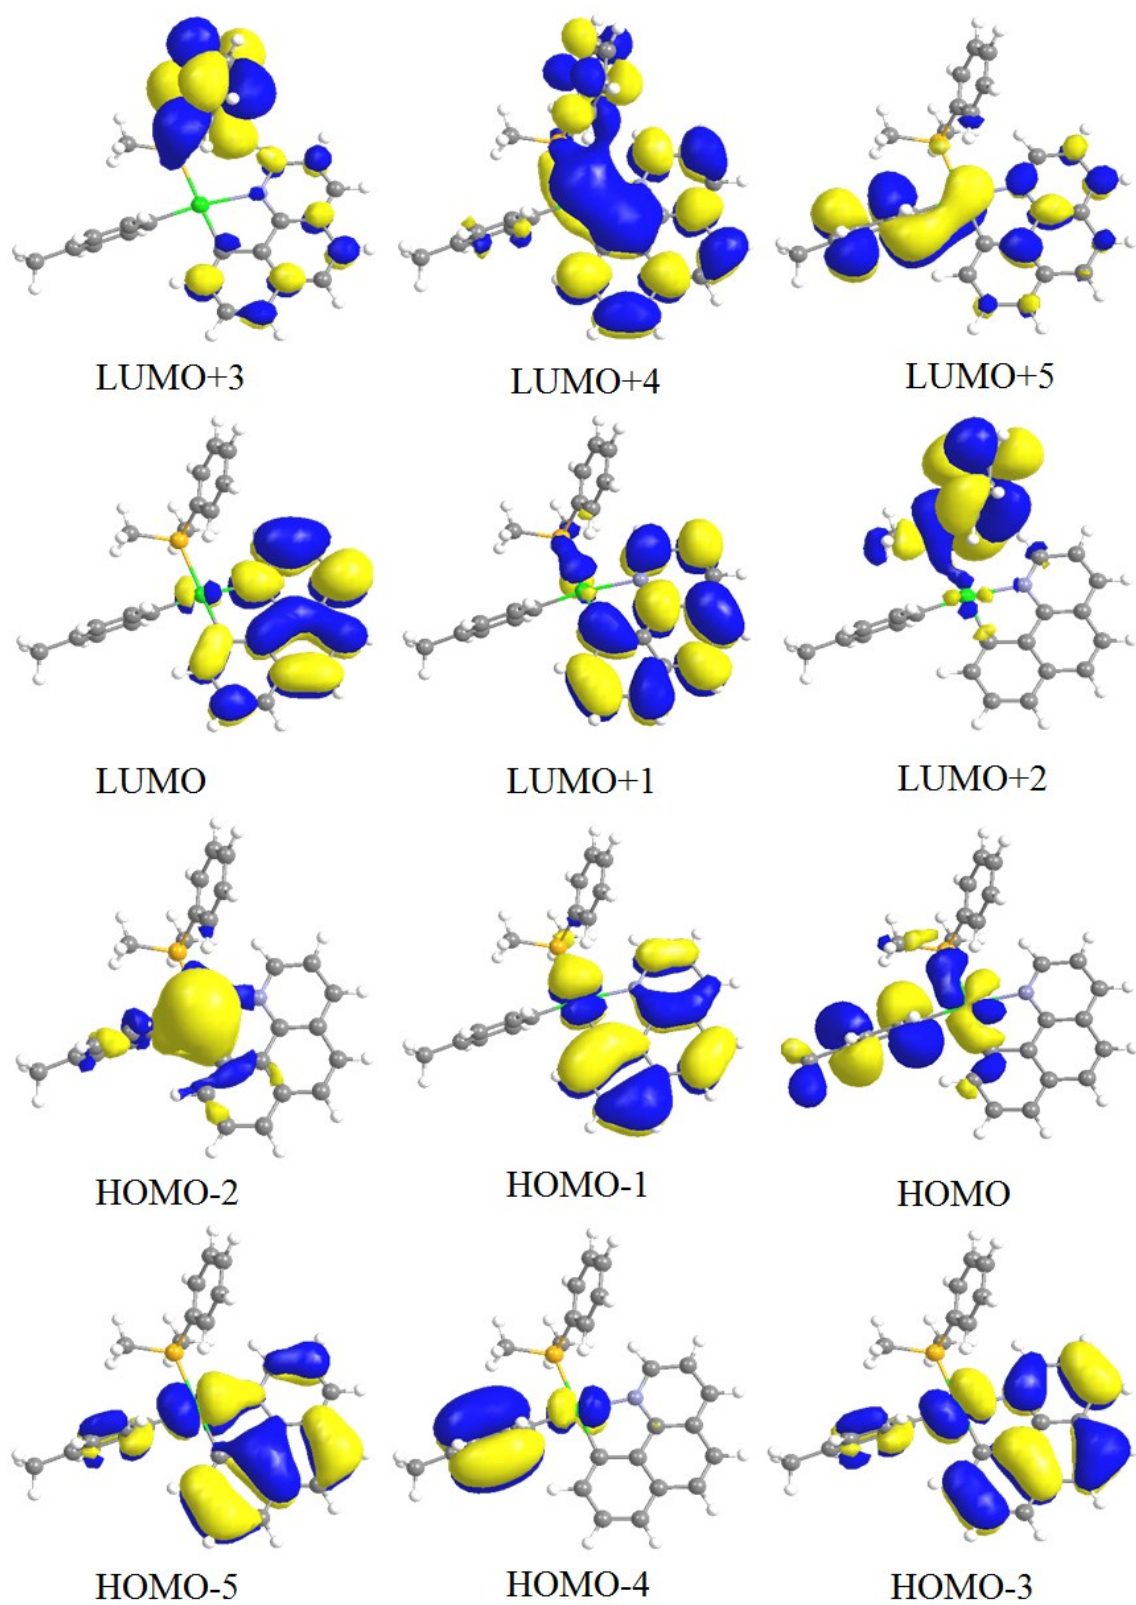

**Figure S7.** Qualitative frontier molecular orbitals for complex **1c**.



**Table S10.** Fragment contributions (%; from atomic orbital contributions) to the frontier orbitals of [Pt(*p*-Me-C<sub>6</sub>H<sub>4</sub>)(bhq)(PPhMe<sub>2</sub>)], **1c** in gas phase.

| Energies(eV) | number | Pt | PPhMe <sub>2</sub> | Bhq | <i>P</i> -tol |
|--------------|--------|----|--------------------|-----|---------------|
| -0.384       | LUMO+3 | 2  | 93                 | 4   | 1             |
| -0.780       | LUMO+2 | 1  | 93                 | 5   | 1             |
| -0.992       | LUMO+1 | 5  | 12                 | 82  | 1             |
| -1.818       | LUMO   | 2  | 2                  | 96  | 0             |
| -5.134       | HOMO   | 21 | 3                  | 71  | 5             |
| -5.174       | HOMO-1 | 22 | 5                  | 15  | 58            |
| -5.538       | HOMO-2 | 80 | 2                  | 9   | 9             |
| -5.845       | HOMO-3 | 43 | 1                  | 34  | 22            |
| -5.948       | HOMO-4 | 26 | 1                  | 11  | 62            |
| -6.209       | HOMO-5 | 63 | 1                  | 30  | 6             |
| -6.576       | HOMO-6 | 29 | 16                 | 54  | 1             |
| -6.649       | HOMO-7 | 24 | 22                 | 52  | 2             |
| -7.011       | HOMO-8 | 20 | 21                 | 23  | 37            |



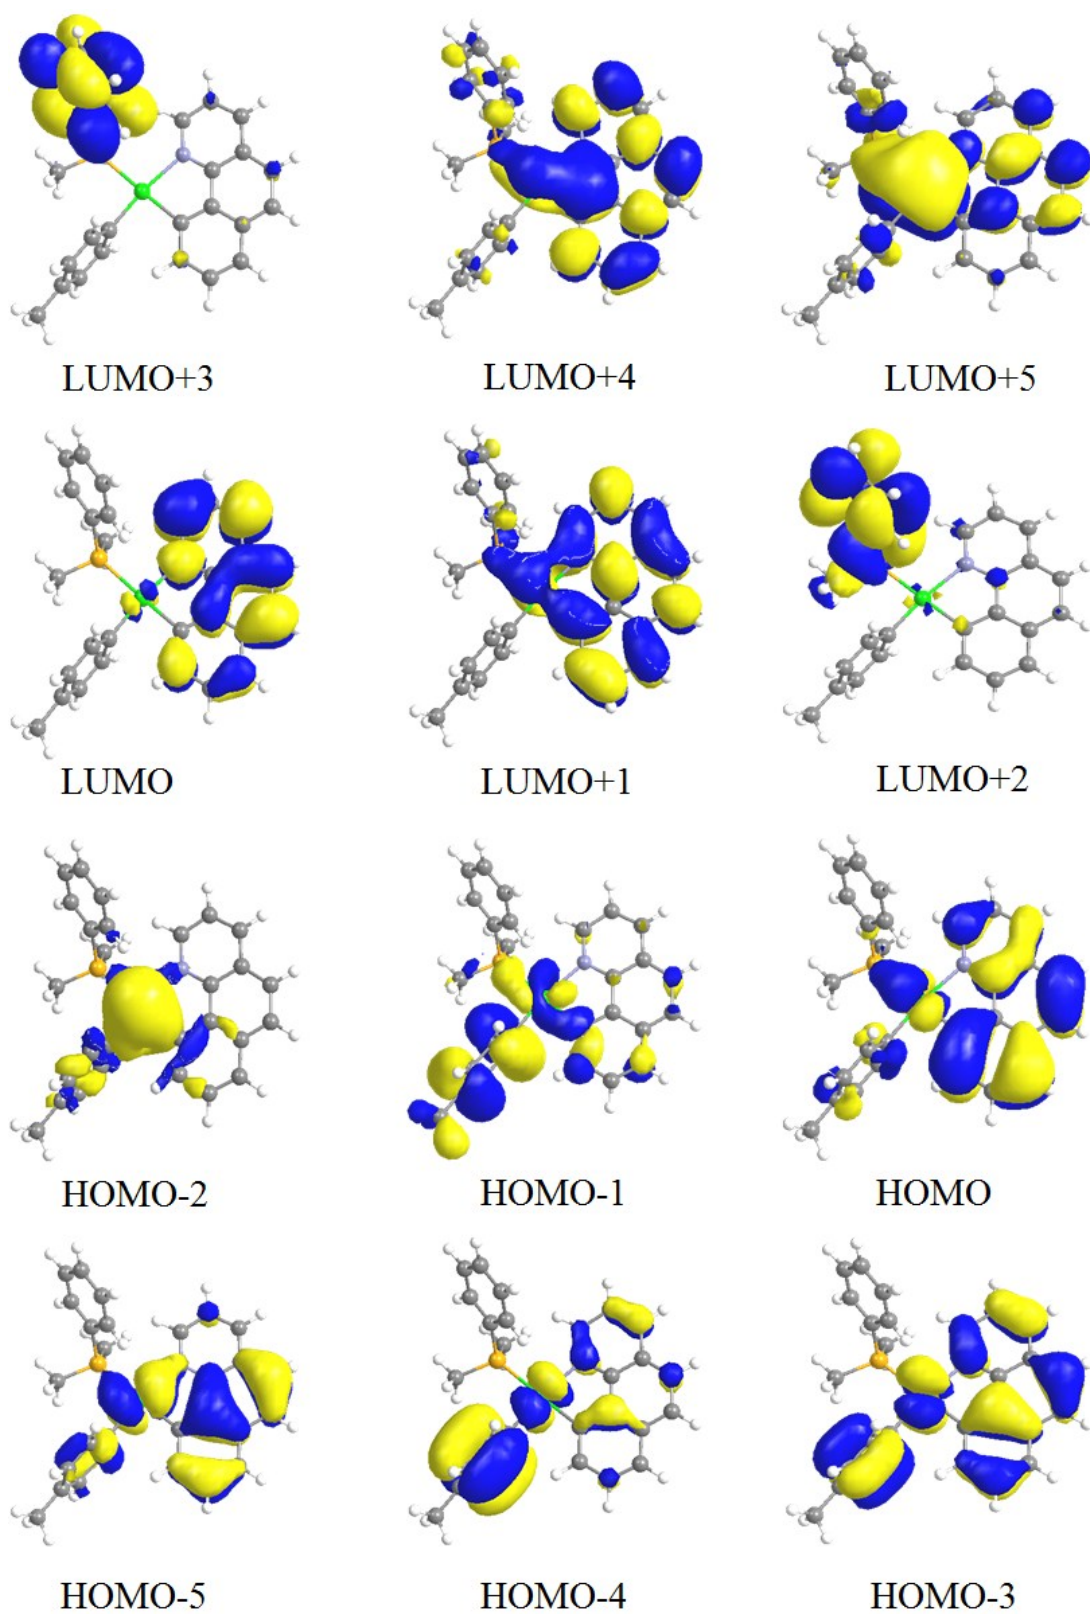

**Figure S8.** Qualitative frontier molecular orbitals for complex **1c** in gas phase.

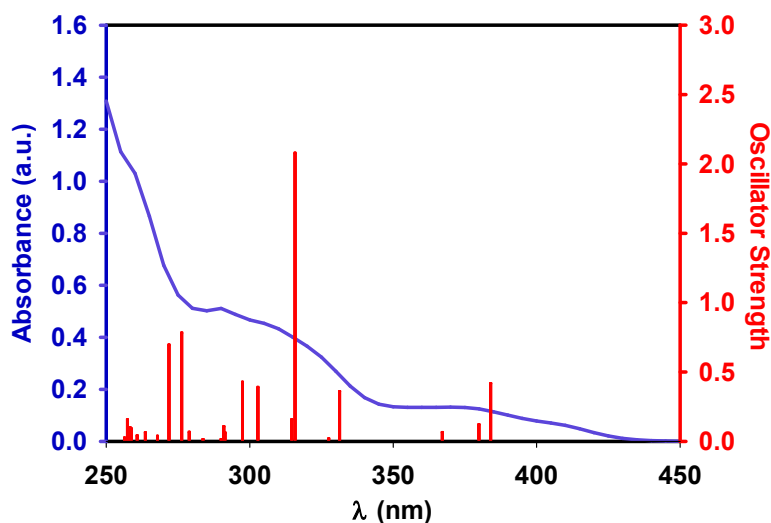

**Figure S9.** Experimental UV-vis spectra in  $\text{CH}_2\text{Cl}_2$  ( $10^{-5}$  M) at 298 K and calculated absorption spectra, showing by bars, in  $\text{CH}_2\text{Cl}_2$  for the complex **1c**.

**Table S11.** Selected vertical singlet excitations of **1c** from TDDFT calculations at the ground state geometry in  $\text{CH}_2\text{Cl}_2$  solution ( $10^{-5}$ ).

| state | Monoexcitations <sup>a</sup>                                              | $\Delta E/\text{eV}$ | $\lambda_{\text{cal}}/\text{nm}$ | oscillator strength | main character |
|-------|---------------------------------------------------------------------------|----------------------|----------------------------------|---------------------|----------------|
| S1    | H-1→L (83%)<br>H→L (12%)                                                  | 3.233                | 383                              | 0.0416              | MLCT/LC/LLCT   |
| S2    | H→L (78%)<br>H-1→L (11%)                                                  | 3.268                | 379                              | 0.0121              | MLCT/LC/LLCT   |
| S3    | H-2→L (89%)                                                               | 3.381                | 367                              | 0.0064              | MLCT           |
| S4    | H-3→L (53%)<br>H-1→L+1 (37%)                                              | 3.747                | 331                              | 0.036               | MLCT/LC        |
| S6    | H-1→L+1 (46%)<br>H-3→L (25%)<br>H-5→L (17%)                               | 3.930                | 315                              | 0.208               | MLCT/LC        |
| S7    | H-2→L+1 (90%)                                                             | 3.945                | 314                              | 0.0156              | MLCT           |
| S8    | H-5→L (44%)<br>H-4→L (24%)<br>H-3→L (13%)                                 | 4.098                | 303                              | 0.039               | MLCT/LC/LLCT   |
| S9    | H-4→L (40%)<br>H-3→L+1 (35%)<br>H-7→L (14%)                               | 4.172                | 297                              | 0.0426              | MLCT/LC/LLCT   |
| S11   | H-6→L (23%)<br>H-4→L (23%)<br>H-5→L (20%)<br>H-3→L+1 (14%)<br>H-7→L (12%) | 4.265                | 291                              | 0.011               | MLCT/LC/LLCT   |
| S15   | H-5→L+1 (47%)<br>H-7→L (22%)<br>H-3→L+1 (11%)                             | 4.491                | 276                              | 0.078               | MLCT/LC        |
| S16   | H-7→L (35%)                                                               | 4.564                | 272                              | 0.0695              | MLCT/LC/LLCT   |

|     |                                                 |       |     |        |      |
|-----|-------------------------------------------------|-------|-----|--------|------|
|     | H-1→L+4 (21%)<br>H-5→L+1 (14%)<br>H-1→L+3 (10%) |       |     |        |      |
| S26 | H-2→L+3 (80%)                                   | 4.955 | 250 | 0.1986 | MLCT |

**Table S12.** Lowest-energy vertical triplet excitations of **1c** from TDDFT calculations in gas phase.

| state | Monoexcitations <sup>a</sup>            | $\Delta E/eV$ | $\lambda_{cal}/nm$ | main character |
|-------|-----------------------------------------|---------------|--------------------|----------------|
| T1    | H→L (66%)                               | 1.926         | 644                | MLCT/LC        |
| T2    | H→L+1 (33%)<br>H→L (27%)<br>H-3→L (22%) | 2.690         | 461                | MLCT/LC/LLCT   |
| T3    | H-1→L (73%)                             | 2.795         | 443                | MLCT/LC/LLCT   |
| T4    | H-3→L (32%)<br>H→L+1 (30%)              | 2.844         | 436                | MLCT/LC/LLCT   |
| T5    | H-2→L (80%)<br>H-1→L (11%)              | 2.929         | 423                | MLCT/LC/LLCT   |

#### 1.4. Complex 2a

**Table S13.** Fragment contributions (%; from atomic orbital contributions) to the frontier orbitals of [Pt(C<sub>6</sub>H<sub>5</sub>)(bhq)(PPh<sub>2</sub>Me)], **2a** in CH<sub>2</sub>Cl<sub>2</sub> solution.

| Energies(eV) | number  | Pt | PPh <sub>2</sub> Me | Bhq | C <sub>6</sub> H <sub>5</sub> |
|--------------|---------|----|---------------------|-----|-------------------------------|
| -0.161       | LUMO+6  | 4  | 47                  | 46  | 3                             |
| -0.285       | LUMO+5  | 6  | 63                  | 28  | 3                             |
| -0.427       | LUMO+4  | 5  | 86                  | 7   | 2                             |
| -0.614       | LUMO+3  | 10 | 82                  | 6   | 2                             |
| -0.867       | LUMO+2  | 3  | 94                  | 2   | 1                             |
| -1.156       | LUMO+1  | 4  | 6                   | 89  | 1                             |
| -1.689       | LUMO    | 3  | 2                   | 94  | 1                             |
| -5.624       | HOMO    | 29 | 3                   | 67  | 1                             |
| -5.711       | HOMO-1  | 31 | 6                   | 12  | 51                            |
| -5.876       | HOMO-2  | 82 | 2                   | 6   | 10                            |
| -6.206       | HOMO-3  | 44 | 1                   | 48  | 7                             |
| -6.398       | HOMO-4  | 16 | 4                   | 4   | 76                            |
| -6.523       | HOMO-5  | 41 | 11                  | 39  | 9                             |
| -6.608       | HOMO-6  | 26 | 38                  | 34  | 2                             |
| -6.815       | HOMO-7  | 50 | 6                   | 43  | 1                             |
| -7.047       | HOMO-8  | 1  | 97                  | 1   | 1                             |
| -7.107       | HOMO-9  | 2  | 95                  | 2   | 1                             |
| -7.160       | HOMO-10 | 5  | 82                  | 6   | 7                             |
| -7.292       | HOMO-11 | 16 | 38                  | 25  | 21                            |
| -7.506       | HOMO-12 | 12 | 29                  | 35  | 24                            |

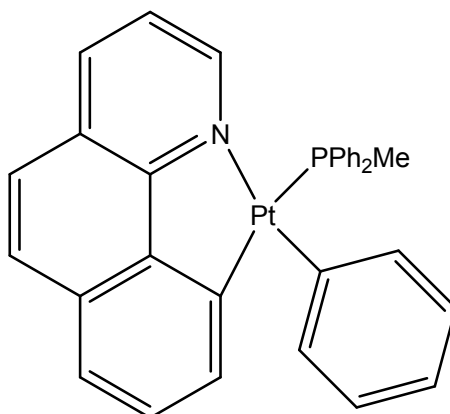

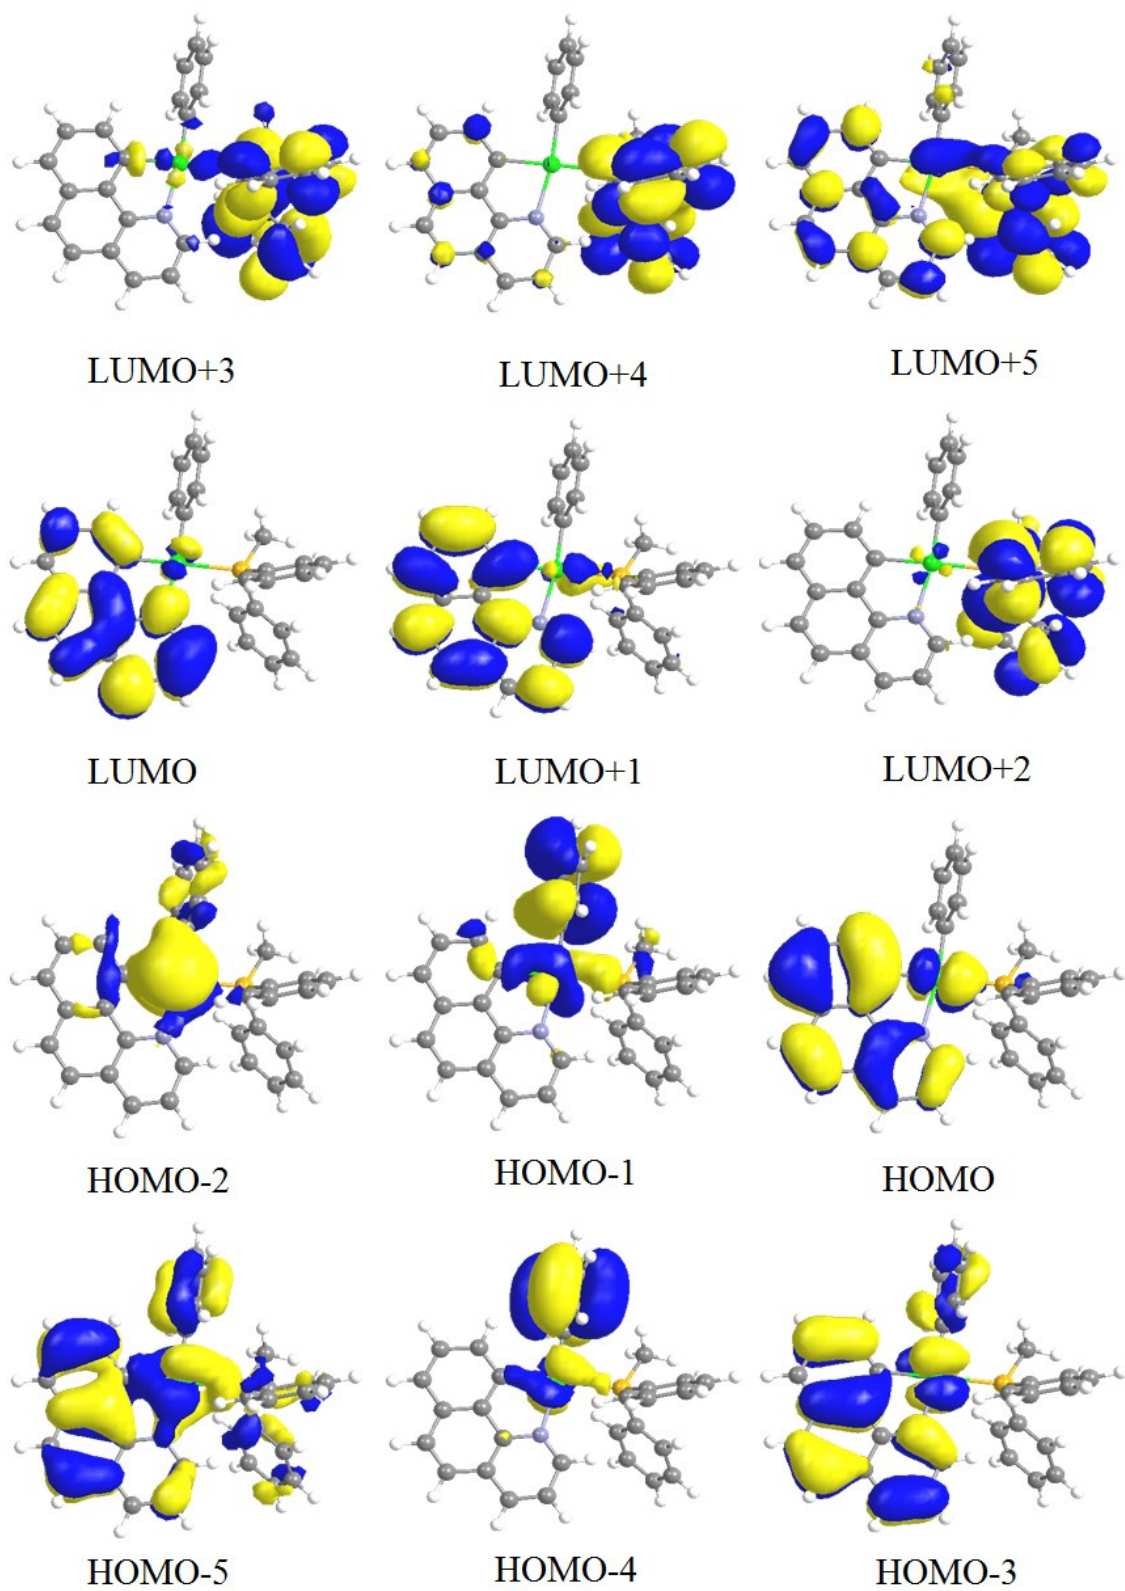

**Figure S10.** Qualitative frontier molecular orbitals for complex **2a**.

**Table S14.** Fragment contributions (%; from atomic orbital contributions) to the frontier orbitals of [Pt(C<sub>6</sub>H<sub>5</sub>)(bhq)(PPh<sub>2</sub>Me)], **2a** in gas phase.

| Energies(eV) | number  | Pt | PPh <sub>2</sub> Me | Bhq | C <sub>6</sub> H <sub>5</sub> |
|--------------|---------|----|---------------------|-----|-------------------------------|
| 0.078        | LUMO+6  | 4  | 12                  | 80  | 4                             |
| -0.255       | LUMO+5  | 3  | 94                  | 3   | 0                             |
| -0.427       | LUMO+4  | 6  | 88                  | 5   | 1                             |
| -0.575       | LUMO+3  | 5  | 88                  | 6   | 1                             |
| -0.866       | LUMO+2  | 2  | 93                  | 4   | 1                             |
| -0.979       | LUMO+1  | 4  | 13                  | 82  | 1                             |
| -1.784       | LUMO    | 2  | 1                   | 96  | 1                             |
| -5.126       | HOMO    | 20 | 3                   | 77  | 0                             |
| -5.319       | HOMO-1  | 28 | 6                   | 11  | 55                            |
| -5.532       | HOMO-2  | 80 | 2                   | 8   | 10                            |
| -5.853       | HOMO-3  | 44 | 1                   | 39  | 16                            |
| -5.970       | HOMO-4  | 20 | 2                   | 8   | 70                            |
| -6.206       | HOMO-5  | 64 | 2                   | 27  | 7                             |
| -6.476       | HOMO-6  | 16 | 41                  | 41  | 2                             |
| -6.586       | HOMO-7  | 40 | 3                   | 57  | 0                             |
| -7.017       | HOMO-8  | 17 | 19                  | 25  | 39                            |
| -7.066       | HOMO-9  | 1  | 95                  | 2   | 2                             |
| -7.109       | HOMO-10 | 2  | 95                  | 2   | 1                             |
| -7.216       | HOMO-11 | 4  | 83                  | 7   | 6                             |



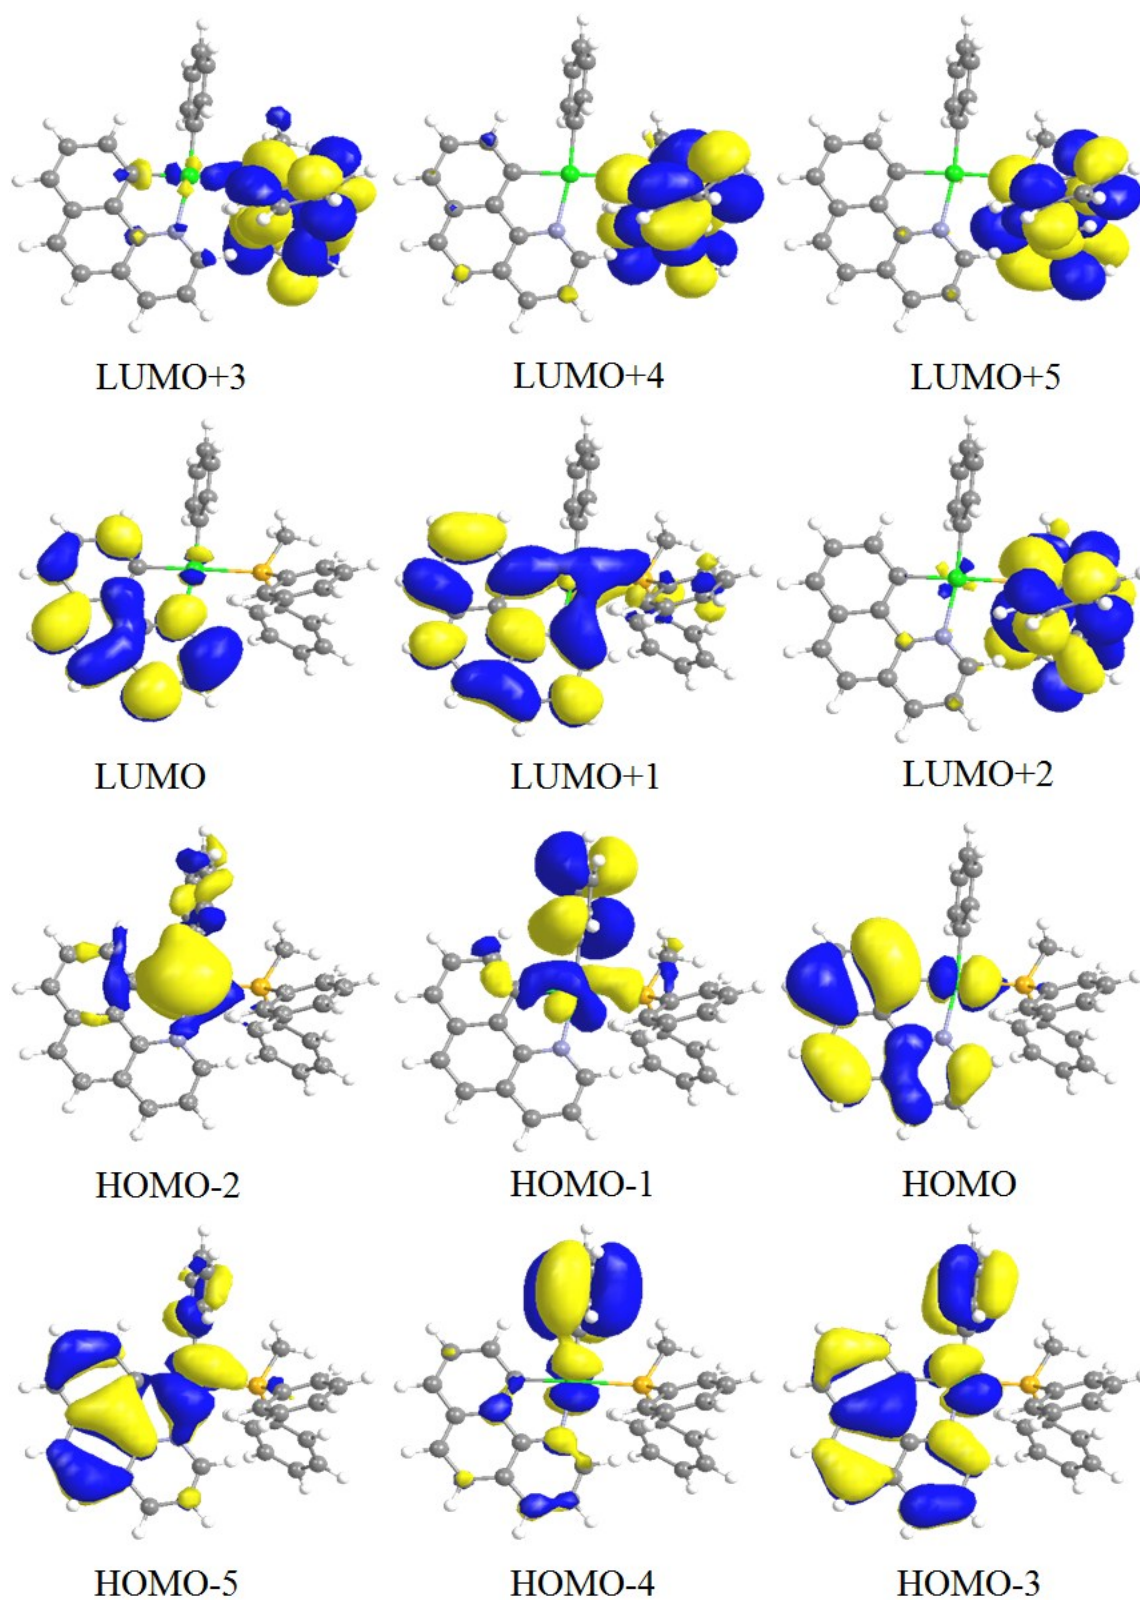

**Figure S11.** Qualitative frontier molecular orbitals for complex **2a** in gas phase.

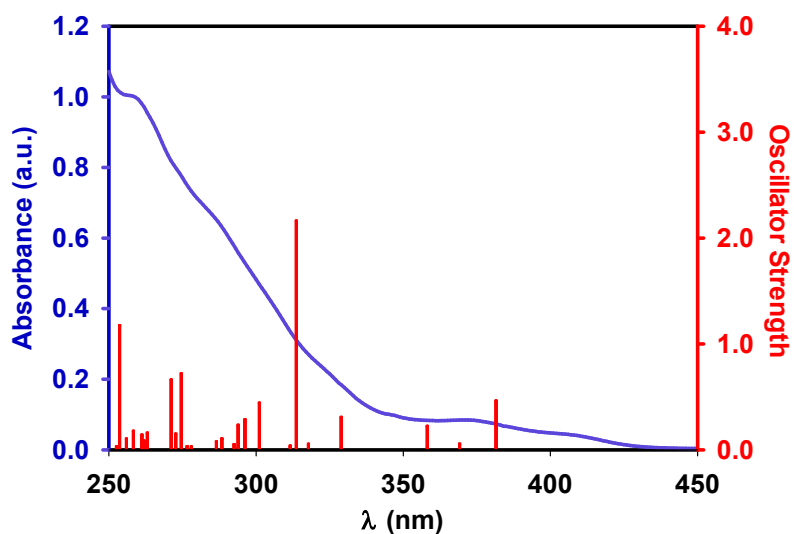

**Figure S12.** Experimental UV-vis spectra in  $\text{CH}_2\text{Cl}_2$  ( $10^{-5}$  M) at 298 K and calculated absorption spectra, showing by bars, in  $\text{CH}_2\text{Cl}_2$  for the complex **2a**.

**Table S15.** Selected vertical singlet excitations of **2a** from TDDFT calculations at the ground state geometry in  $\text{CH}_2\text{Cl}_2$  solution ( $10^{-5}$ ).

| state | Monoexcitations <sup>a</sup>                               | $\Delta E/\text{eV}$ | $\lambda_{\text{cal}}/\text{nm}$ | oscillator strength | main character |
|-------|------------------------------------------------------------|----------------------|----------------------------------|---------------------|----------------|
| S1    | H→L (93%)                                                  | 3.254                | 381                              | 0.0461              | MLCT/LC        |
| S2    | H-2→L (62%)<br>H-1→L (36%)                                 | 3.363                | 369                              | 0.0054              | MLCT/LC/LLCT   |
| S3    | H-1→L (60%)<br>H-2→L (36%)                                 | 3.466                | 358                              | 0.0222              | MLCT/LC/LLCT   |
| S4    | H-3→L (50%)<br>H→L+1 (42%)                                 | 3.774                | 328                              | 0.031               | MLCT/LC        |
| S6    | H→L+1 (43%)<br>H-3→L (31%)<br>H-5→L (15%)                  | 3.957                | 313                              | 0.216               | MLCT/LC/LLCT   |
| S8    | H-5→L (43%)<br>H-4→L (24%)<br>H-3→L (12%)                  | 4.122                | 301                              | 0.044               | MLCT/LC/LLCT   |
| S9    | H-6→L (54%)<br>H-3→L+1 (19%)<br>H-4→L (14%)                | 4.189                | 296                              | 0.0285              | MLCT/LC/LLCT   |
| S10   | H-6→L (30%)<br>H→L+2 (22%)<br>H-3→L+1 (17%)<br>H-7→L (12%) | 4.223                | 294                              | 0.0232              | MLCT/LC/LLCT   |
| S13   | H-4→L (40%)<br>H-5→L (27%)<br>H-3→L+1 (13%)<br>H-7→L (10%) | 4.303                | 288                              | 0.0103              | MLCT/LC/LLCT   |
| S17   | H-5→L+1 (39%)<br>H-7→L (16%)                               | 4.519                | 274                              | 0.072               | MLCT/LC/LLCT   |



|     |               |       |     |        |           |
|-----|---------------|-------|-----|--------|-----------|
|     | H-3→L+1 (10%) |       |     |        |           |
| S26 | H-2→L+3 (80%) | 4.955 | 250 | 0.1986 | MLCT/LLCT |

**Table S16.** Lowest-energy vertical triplet excitations of **2a** from TDDFT calculations in gas phase.

| state | Monoexcitations <sup>a</sup>              | $\Delta E/eV$ | $\lambda_{cal}/nm$ | main character |
|-------|-------------------------------------------|---------------|--------------------|----------------|
| T1    | H→L (71%)<br>H-3→L (10%)                  | 1.935         | 641                | MLCT/LC/LLCT   |
| T2    | H→L+1 (43%)<br>H→L (24%)<br>H-3→L (19%)   | 2.708         | 458                | MLCT/LC/LLCT   |
| T3    | H-3→L (39%)<br>H→L+1 (33%)<br>H-1→L (11%) | 2.847         | 435                | MLCT/LC/LLCT   |
| T4    | H-2→L (61%)<br>H-1→L (33%)                | 2.909         | 426                | MLCT/LC/LLCT   |
| T5    | H-1→L (54%)<br>H-2→L (35%)                | 3.020         | 411                | MLCT/LC/LLCT   |

## 1.5. Complex 2b

**Table S17.** Fragment contributions (%; from atomic orbital contributions) to the frontier orbitals of [Pt(*p*-F-C<sub>6</sub>H<sub>4</sub>)(bhq)(PPh<sub>2</sub>Me)], **2b** in CH<sub>2</sub>Cl<sub>2</sub> solution.

| Energies(eV) | number  | Pt | PPh <sub>2</sub> Me | Bhq | <i>p</i> -F-C <sub>6</sub> H <sub>4</sub> |
|--------------|---------|----|---------------------|-----|-------------------------------------------|
| -0.305       | LUMO+5  | 6  | 62                  | 27  | 5                                         |
| -0.438       | LUMO+4  | 5  | 84                  | 9   | 2                                         |
| -0.622       | LUMO+3  | 9  | 82                  | 7   | 2                                         |
| -0.885       | LUMO+2  | 3  | 93                  | 2   | 2                                         |
| -1.173       | LUMO+1  | 4  | 7                   | 89  | 0                                         |
| -1.709       | LUMO    | 3  | 2                   | 94  | 1                                         |
| -5.645       | HOMO    | 29 | 3                   | 67  | 1                                         |
| -5.664       | HOMO-1  | 25 | 6                   | 11  | 58                                        |
| -5.924       | HOMO-2  | 84 | 2                   | 7   | 7                                         |
| -6.232       | HOMO-3  | 43 | 1                   | 51  | 5                                         |
| -6.537       | HOMO-4  | 48 | 12                  | 31  | 9                                         |
| -6.630       | HOMO-5  | 27 | 36                  | 34  | 3                                         |
| -6.653       | HOMO-6  | 6  | 7                   | 11  | 76                                        |
| -6.847       | HOMO-7  | 47 | 6                   | 41  | 6                                         |
| -7.059       | HOMO-8  | 1  | 97                  | 2   | 0                                         |
| -7.116       | HOMO-9  | 2  | 96                  | 2   | 0                                         |
| -7.180       | HOMO-10 | 4  | 87                  | 5   | 4                                         |
| -7.335       | HOMO-11 | 16 | 46                  | 26  | 12                                        |
| -7.539       | HOMO-12 | 32 | 18                  | 27  | 23                                        |

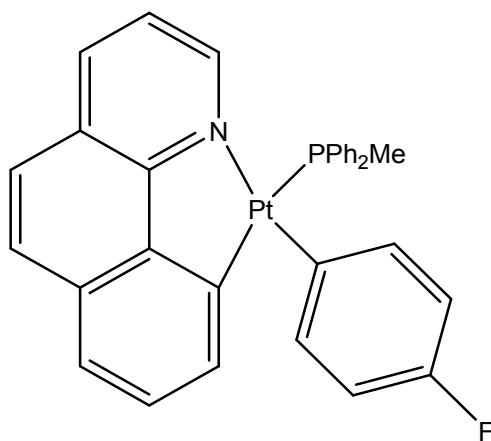

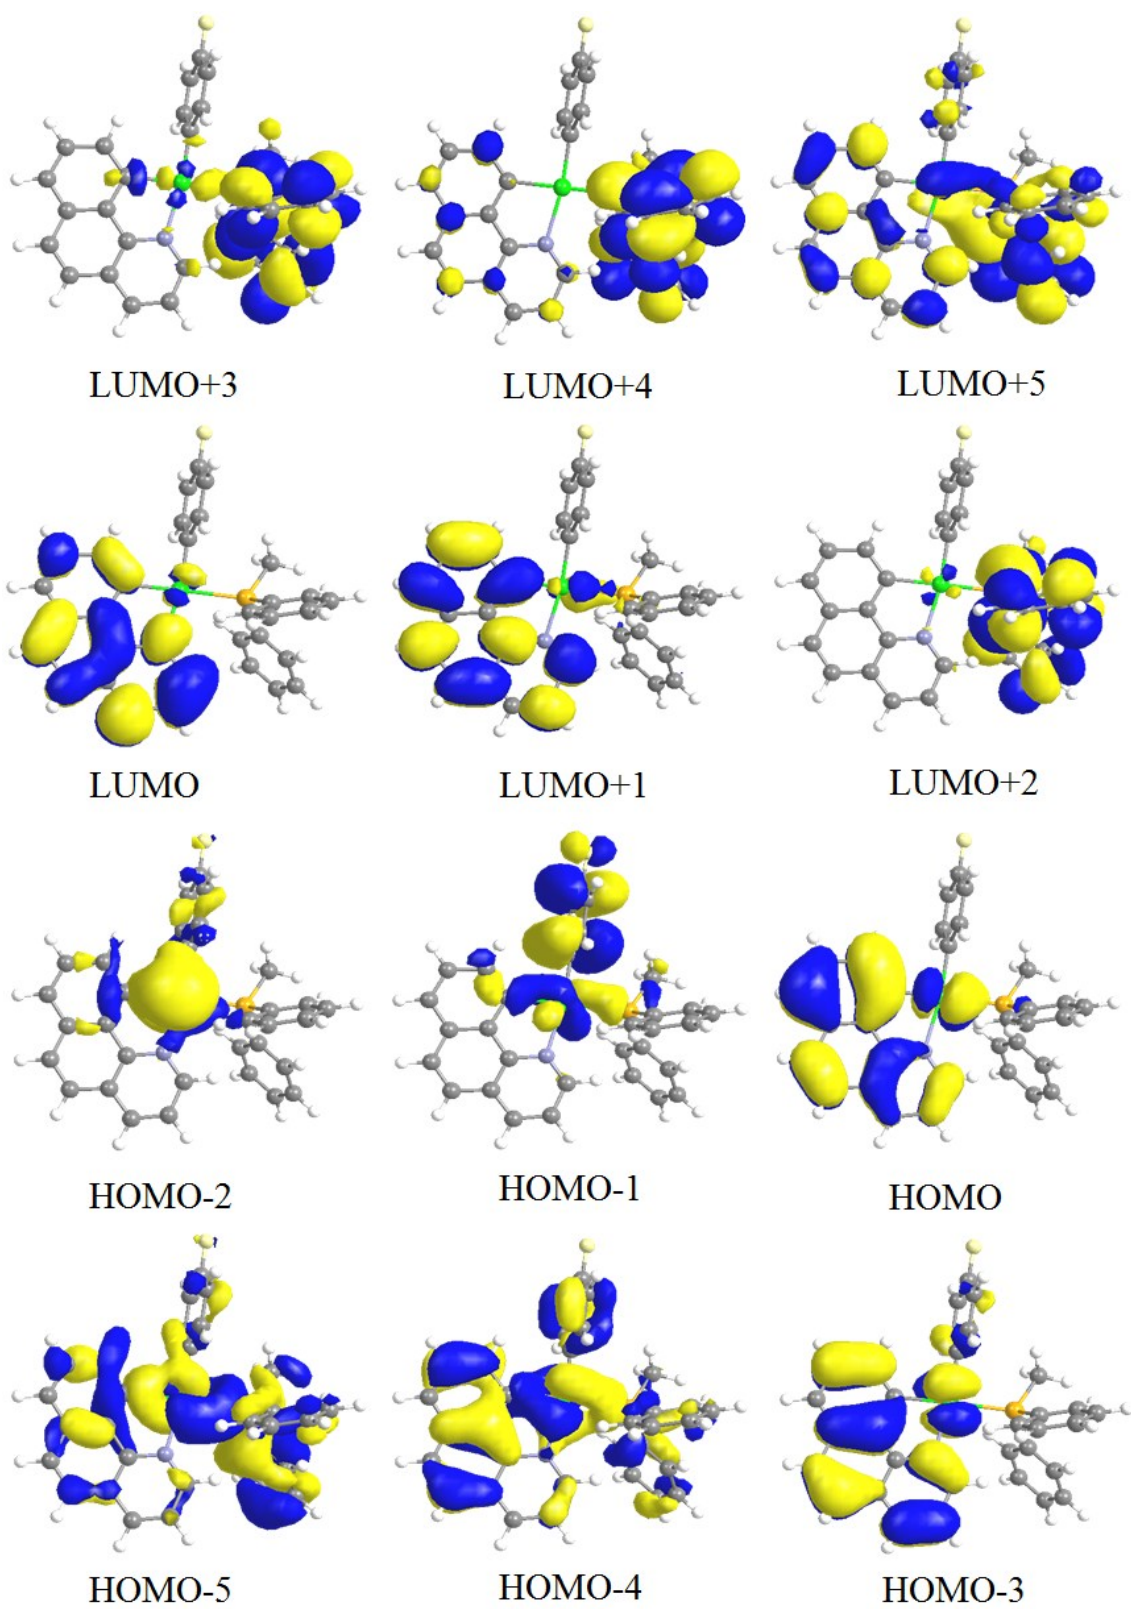

**Figure S13.** Qualitative frontier molecular orbitals for complex **2b**.

**Table S18.** Fragment contributions (%; from atomic orbital contributions) to the frontier orbitals of [Pt(*p*-F-C<sub>6</sub>H<sub>4</sub>)(bhq)(PPh<sub>2</sub>Me)], **2b** in gas phase.

| Energies(eV) | number  | Pt | PPh <sub>2</sub> Me | Bhq | <i>p</i> -F-C <sub>6</sub> H <sub>4</sub> |
|--------------|---------|----|---------------------|-----|-------------------------------------------|
| 0.007        | LUMO+6  | 4  | 13                  | 78  | 5                                         |
| -0.312       | LUMO+5  | 1  | 94                  | 4   | 1                                         |
| -0.481       | LUMO+4  | 6  | 88                  | 5   | 1                                         |
| -0.630       | LUMO+3  | 6  | 87                  | 6   | 1                                         |
| -0.926       | LUMO+2  | 2  | 93                  | 4   | 1                                         |
| -1.045       | LUMO+1  | 4  | 14                  | 81  | 1                                         |
| -1.850       | LUMO    | 2  | 1                   | 96  | 1                                         |
| -5.197       | HOMO    | 20 | 3                   | 77  | 0                                         |
| -5.290       | HOMO-1  | 23 | 5                   | 9   | 63                                        |
| -5.639       | HOMO-2  | 82 | 2                   | 9   | 7                                         |
| -5.943       | HOMO-3  | 49 | 1                   | 45  | 5                                         |
| -6.225       | HOMO-4  | 36 | 2                   | 4   | 58                                        |
| -6.314       | HOMO-5  | 49 | 2                   | 24  | 25                                        |
| -6.548       | HOMO-6  | 15 | 42                  | 41  | 2                                         |
| -6.658       | HOMO-7  | 39 | 4                   | 56  | 1                                         |
| -7.113       | HOMO-8  | 7  | 82                  | 5   | 6                                         |
| -7.145       | HOMO-9  | 14 | 54                  | 14  | 18                                        |
| -7.171       | HOMO-10 | 7  | 76                  | 7   | 10                                        |
| -7.275       | HOMO-11 | 34 | 42                  | 12  | 12                                        |

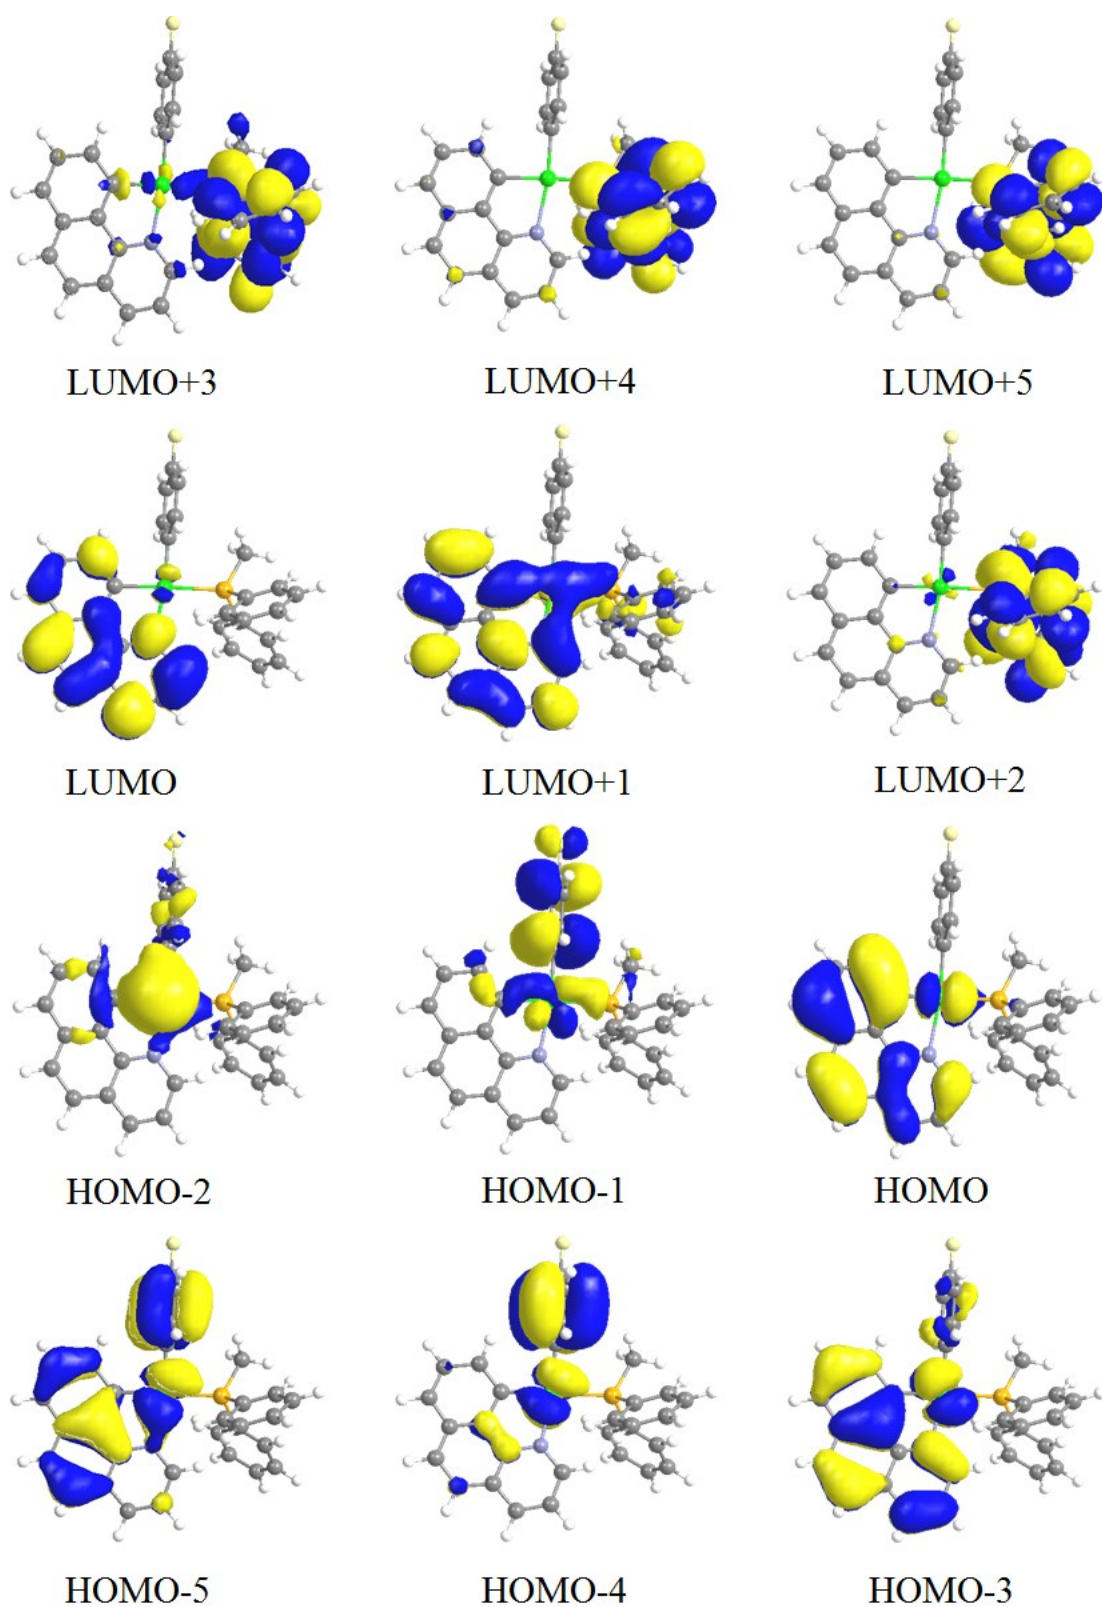

Figure S14. Qualitative frontier molecular orbitals for complex **2b** in gas phase.

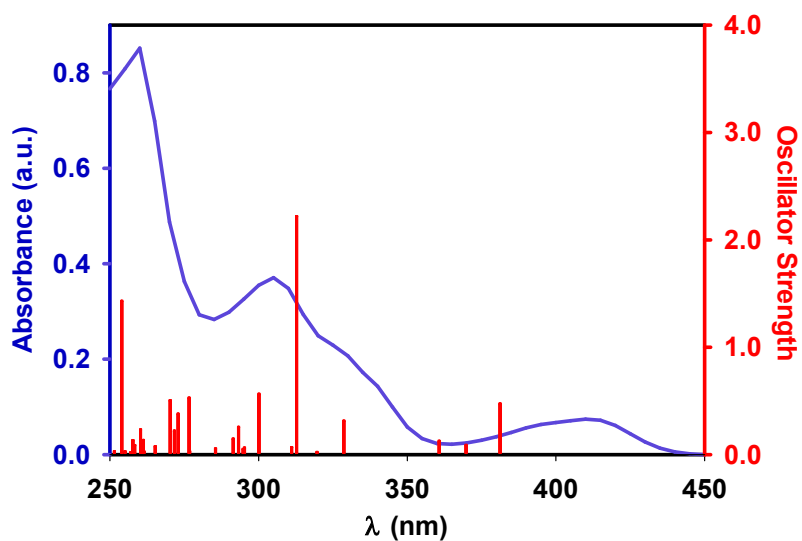

**Figure S15.** Experimental UV-vis spectra in  $\text{CH}_2\text{Cl}_2$  ( $10^{-5}$  M) at 298 K and calculated absorption spectra, showing by bars, in  $\text{CH}_2\text{Cl}_2$  for the complex **2b**.

**Table S19.** Selected vertical singlet excitations of **2b** from TDDFT calculations at the ground state geometry in  $\text{CH}_2\text{Cl}_2$  solution ( $10^{-5}$ ).

| state | Monoexcitations <sup>a</sup>                               | $\Delta E/\text{eV}$ | $\lambda_{\text{cal}}/\text{nm}$ | oscillator strength | main character |
|-------|------------------------------------------------------------|----------------------|----------------------------------|---------------------|----------------|
| S1    | H→L (93%)                                                  | 3.257                | 381                              | 0.047               | MLCT/LC        |
| S2    | H-1→L (71%)<br>H-2→L (27%)                                 | 3.357                | 369                              | 0.0085              | MLCT/LC/LLCT   |
| S3    | H-2→L (71%)<br>H-1→L (27%)                                 | 3.441                | 360                              | 0.0124              | MLCT/LC/LLCT   |
| S4    | H-3→L (51%)<br>H→L+1 (42%)                                 | 3.777                | 328                              | 0.031               | MLCT/LC        |
| S6    | H→L+1 (43%)<br>H-3→L (31%)<br>H-4→L (16%)                  | 3.968                | 312                              | 0.222               | MLCT/LC/LLCT   |
| S7    | H-2→L+1 (88%)                                              | 3.990                | 311                              | 0.0065              | MLCT           |
| S8    | H-4→L (59%)<br>H-3→L (12%)<br>H-3→L+1 (11%)                | 4.135                | 300                              | 0.056               | MLCT/LC/LLCT   |
| S11   | H→L+2 (24%)<br>H-3→L+1 (23%)<br>H-7→L (17%)<br>H-5→L (13%) | 4.232                | 293                              | 0.0252              | MLCT/LC/LLCT   |
| S12   | H→L+2 (58%)<br>H-3→L+1 (12%)<br>H-7→L (10%)                | 4.258                | 291                              | 0.0143              | MLCT/LC/LLCT   |
| S13   | H-2→L+2 (91%)                                              | 4.346                | 285                              | 0.0052              | MLCT           |

**Table S20.** Lowest-energy vertical triplet excitations of **2b** from TDDFT calculations in gas phase.

| state | Monoexcitations <sup>a</sup>              | $\Delta E/eV$ | $\lambda_{cal}/nm$ | main character |
|-------|-------------------------------------------|---------------|--------------------|----------------|
| T1    | H→L (71%)<br>H-3→L (12%)                  | 1.937         | 640                | MLCT/LC        |
| T2    | H→L+1 (44%)<br>H→L (24%)<br>H-3→L (21%)   | 2.711         | 457                | MLCT/LC/LLCT   |
| T3    | H-3→L (33%)<br>H-1→L (32%)<br>H→L+1 (26%) | 2.841         | 436                | MLCT/LC/LLCT   |
| T4    | H-1→L (52%)<br>H-3→L (19%)<br>H-2→L (17%) | 2.900         | 427                | MLCT/LC/LLCT   |
| T5    | H-2→L (78%)<br>H-1→L (14%)                | 2.996         | 414                | MLCT/LLCT      |

## 1.6. Complex 2c

**Table S21.** Fragment contributions (%; from atomic orbital contributions) to the frontier orbitals of [Pt(*p*-<sup>t</sup>Bu-C<sub>6</sub>H<sub>4</sub>)(bhq)(PPh<sub>2</sub>Me)], **2c** in CH<sub>2</sub>Cl<sub>2</sub> solution.

| Energies(eV) | number  | Pt <sub>1</sub> | PPh <sub>2</sub> Me | Bhq | <i>p</i> - <sup>t</sup> Bu-C <sub>6</sub> H <sub>4</sub> |
|--------------|---------|-----------------|---------------------|-----|----------------------------------------------------------|
| -0.152       | LUMO+6  | 4               | 46                  | 46  | 4                                                        |
| -0.285       | LUMO+5  | 6               | 65                  | 27  | 2                                                        |
| -0.425       | LUMO+4  | 5               | 86                  | 8   | 1                                                        |
| -0.603       | LUMO+3  | 9               | 82                  | 7   | 1                                                        |
| -0.865       | LUMO+2  | 3               | 94                  | 2   | 1                                                        |
| -1.151       | LUMO+1  | 4               | 6                   | 89  | 1                                                        |
| -1.685       | LUMO    | 3               | 2                   | 94  | 1                                                        |
| -5.556       | HOMO    | 25              | 5                   | 10  | 60                                                       |
| -5.617       | HOMO-1  | 28              | 3                   | 67  | 2                                                        |
| -5.861       | HOMO-2  | 82              | 2                   | 7   | 9                                                        |
| -6.192       | HOMO-3  | 45              | 1                   | 45  | 9                                                        |
| -6.336       | HOMO-4  | 16              | 3                   | 4   | 77                                                       |
| -6.504       | HOMO-5  | 44              | 9                   | 40  | 7                                                        |
| -6.597       | HOMO-6  | 22              | 40                  | 35  | 3                                                        |
| -6.810       | HOMO-7  | 50              | 7                   | 42  | 1                                                        |
| -7.042       | HOMO-8  | 1               | 96                  | 2   | 1                                                        |
| -7.102       | HOMO-9  | 2               | 95                  | 2   | 1                                                        |
| -7.154       | HOMO-10 | 5               | 78                  | 7   | 10                                                       |
| -7.279       | HOMO-11 | 18              | 36                  | 22  | 24                                                       |
| -7.448       | HOMO-12 | 20              | 30                  | 30  | 20                                                       |

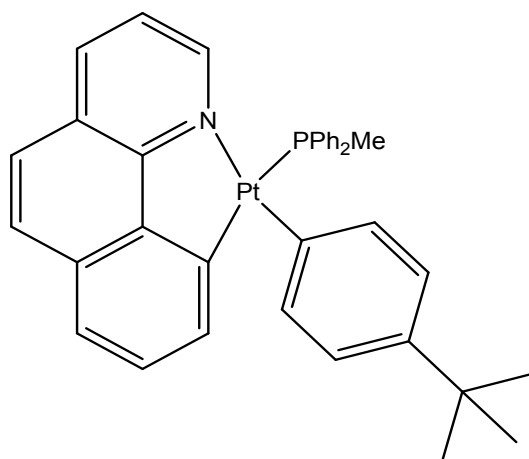



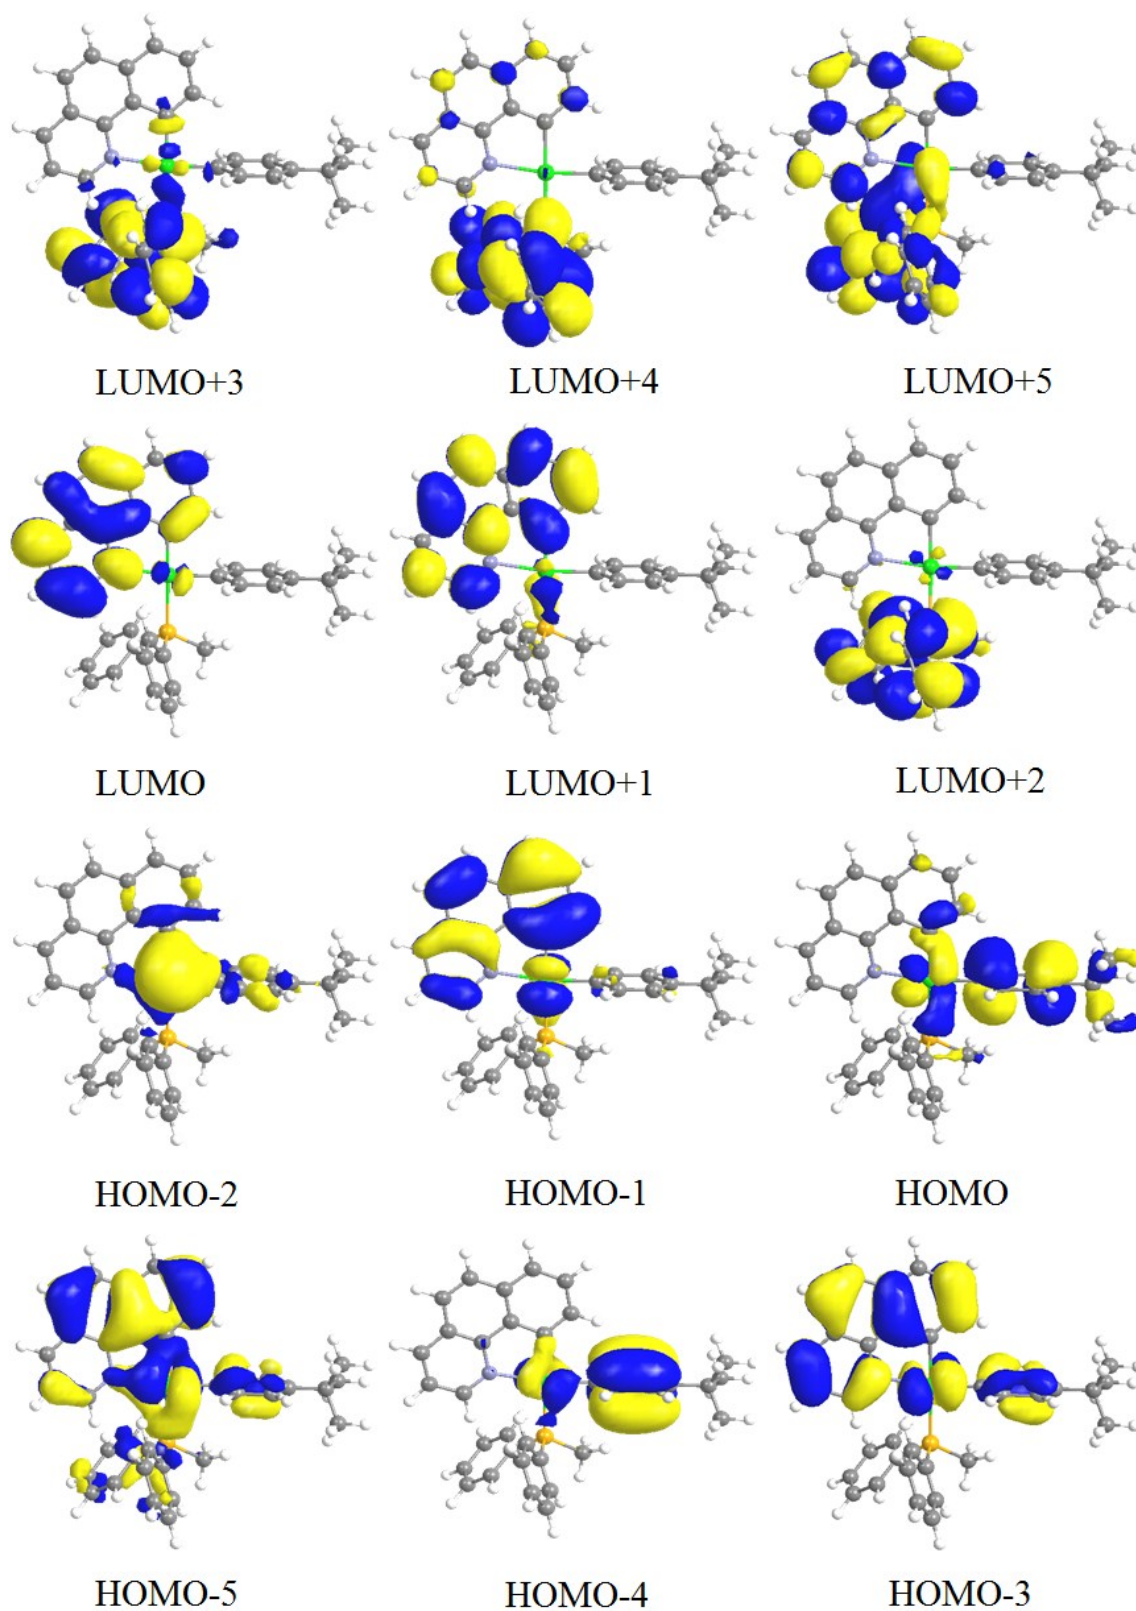

**Figure S16.** Qualitative frontier molecular orbitals for complex **2c**.

**Table S22.** Fragment contributions (%; from atomic orbital contributions) to the frontier orbitals of [Pt(*p*-<sup>1</sup>Bu-C<sub>6</sub>H<sub>4</sub>)(bhq)(PPh<sub>2</sub>Me)], **2c** in gas phase.

| Energies(eV) | number  | Pt <sub>1</sub> | PPh <sub>2</sub> Me | Bhq | <i>p</i> - <sup>1</sup> Bu-C <sub>6</sub> H <sub>4</sub> |
|--------------|---------|-----------------|---------------------|-----|----------------------------------------------------------|
| 0.082        | LUMO+6  | 4               | 12                  | 80  | 4                                                        |
| -0.254       | LUMO+5  | 2               | 94                  | 4   | 0                                                        |
| -0.424       | LUMO+4  | 6               | 89                  | 4   | 1                                                        |
| -0.570       | LUMO+3  | 5               | 88                  | 6   | 1                                                        |
| -0.863       | LUMO+2  | 2               | 93                  | 4   | 1                                                        |
| -0.974       | LUMO+1  | 4               | 13                  | 81  | 2                                                        |
| -1.777       | LUMO    | 2               | 1                   | 96  | 1                                                        |
| -5.121       | HOMO    | 20              | 3                   | 77  | 0                                                        |
| -5.193       | HOMO-1  | 24              | 5                   | 8   | 63                                                       |
| -5.521       | HOMO-2  | 80              | 2                   | 9   | 9                                                        |
| -5.838       | HOMO-3  | 42              | 1                   | 35  | 22                                                       |
| -5.940       | HOMO-4  | 25              | 2                   | 11  | 62                                                       |
| -6.193       | HOMO-5  | 64              | 1                   | 28  | 7                                                        |
| -6.468       | HOMO-6  | 16              | 41                  | 41  | 2                                                        |
| -6.581       | HOMO-7  | 39              | 4                   | 57  | 0                                                        |
| -6.987       | HOMO-8  | 20              | 15                  | 23  | 43                                                       |
| -7.061       | HOMO-9  | 1               | 93                  | 3   | 3                                                        |
| -7.108       | HOMO-10 | 1               | 96                  | 2   | 1                                                        |
| -7.179       | HOMO-11 | 51              | 16                  | 12  | 21                                                       |

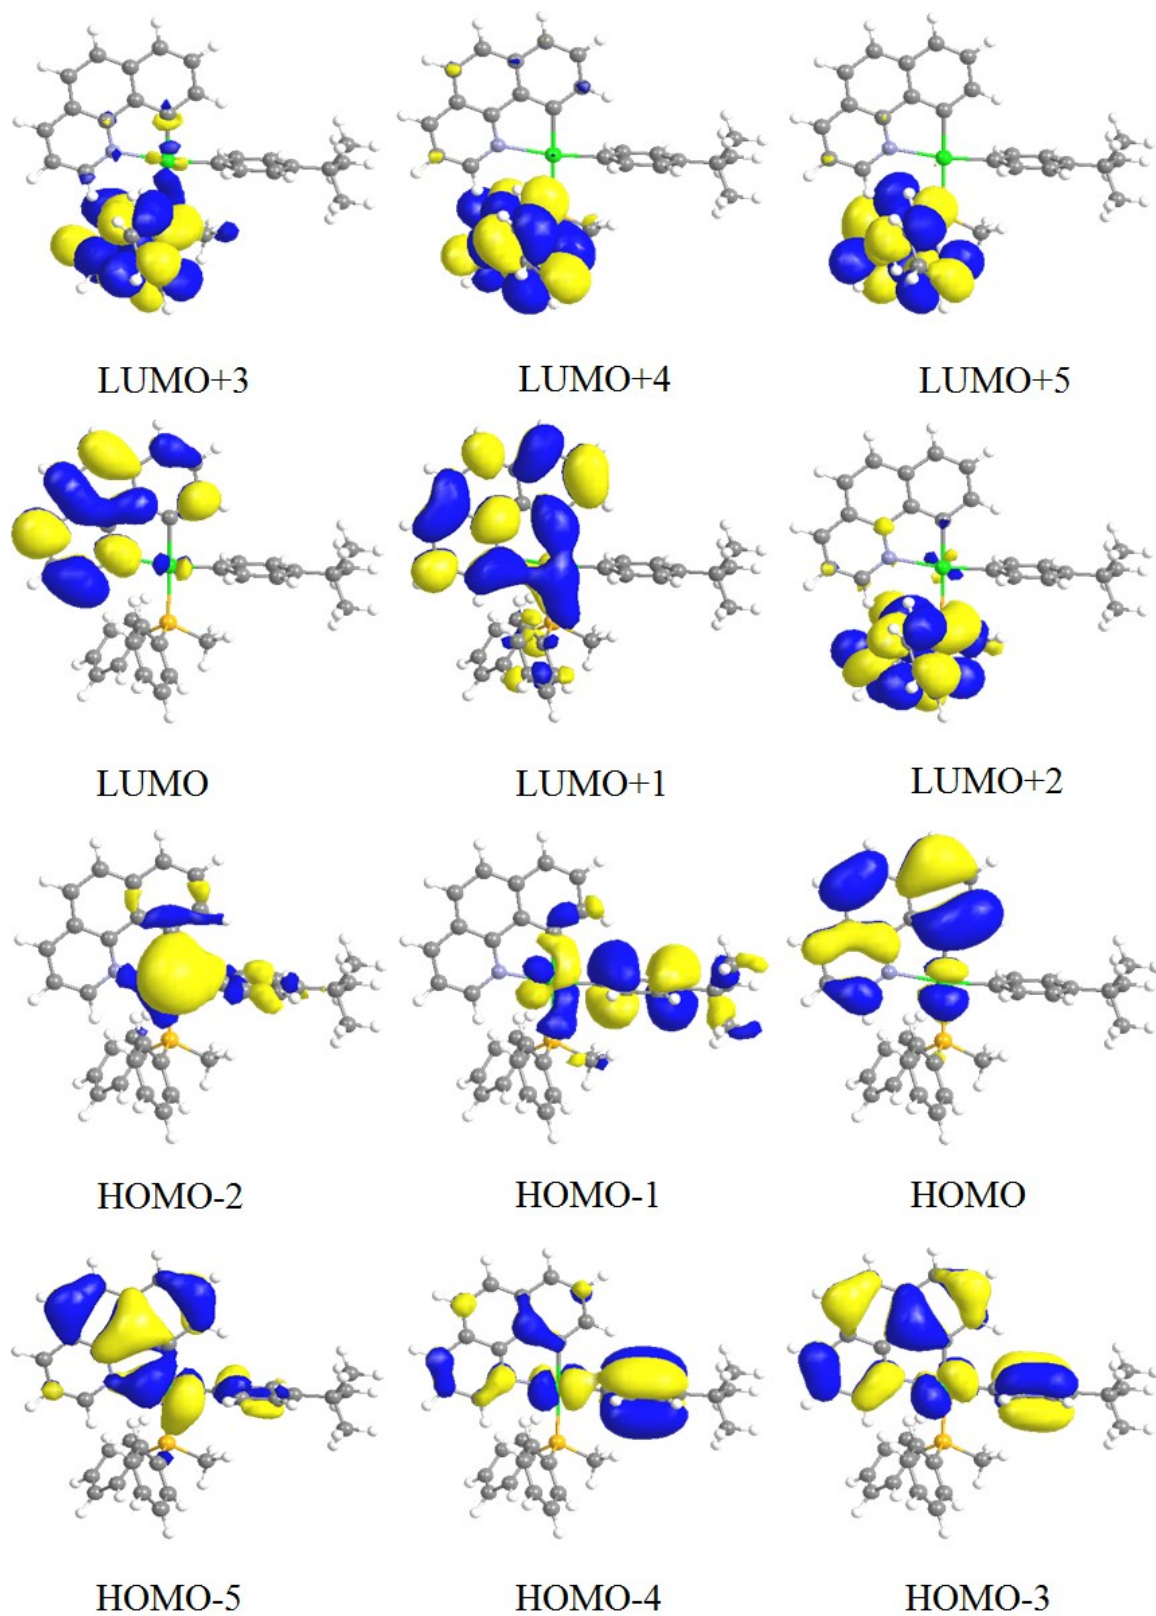

**Figure S17.** Qualitative frontier molecular orbitals for complex **2c** in gas phase.

2D Graph 1

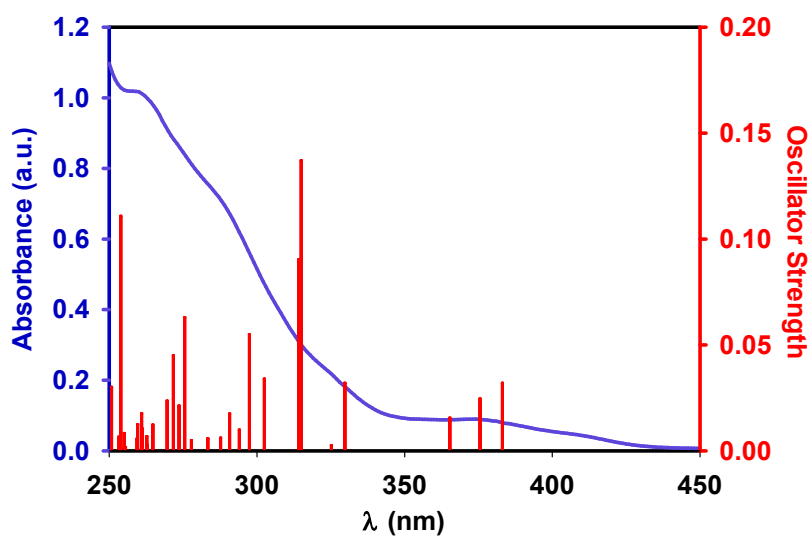

**Figure S18.** Experimental UV-vis spectra in  $\text{CH}_2\text{Cl}_2$  ( $10^{-5}$  M) at 298 K and calculated absorption spectra, showing by bars, in  $\text{CH}_2\text{Cl}_2$  for the complex **2c**.

**Table S23.** Selected vertical singlet excitations of **2c** from TDDFT calculations at the ground state geometry in  $\text{CH}_2\text{Cl}_2$  solution ( $10^{-5}$ ).

| state | Monoexcitations <sup>a</sup>                  | $\Delta E/\text{eV}$ | $\lambda_{\text{cal}}/\text{nm}$ | oscillator strength | main character |
|-------|-----------------------------------------------|----------------------|----------------------------------|---------------------|----------------|
| S1    | H-1→L (65%)<br>H→L (30%)                      | 3.240                | 383                              | 0.032               | MLCT/LC/LLCT   |
| S2    | H→L (57%)<br>H-1→L (25%)<br>H-2→L (16%)       | 3.305                | 375                              | 0.0244              | MLCT/LC/LLCT   |
| S3    | H-2→L (82%)<br>H→L (10%)                      | 3.398                | 365                              | 0.0153              | MLCT/LC/LLCT   |
| S4    | H-3→L (46%)<br>H-1→L+1 (33%)<br>H→L+1 (12%)   | 3.764                | 329                              | 0.032               | MLCT/LC/LLCT   |
| S6    | H-2→L+1 (37%)<br>H-1→L+1 (23%)<br>H-3→L (20%) | 3.940                | 315                              | 0.137               | MLCT/LC        |
| S7    | H-2→L+1 (55%)<br>H-1→L+1 (19%)<br>H-5→L (10%) | 3.950                | 314                              | 0.0903              | MLCT/LC        |
| S8    | H-5→L (37%)<br>H-4→L (32%)<br>H-3→L (14%)     | 4.102                | 302                              | 0.034               | MLCT/LC/LLCT   |
| S10   | H-6→L (32%)<br>H-3→L+1 (26%)<br>H-4→L (21%)   | 4.172                | 297                              | 0.055               | MLCT/LC/LLCT   |
| S11   | H-6→L (56%)<br>H-4→L (14%)                    | 4.220                | 294                              | 0.0097              | MLCT/LC/LLCT   |
| S13   | H-3→L+1 (25%)                                 | 4.268                | 290                              | 0.0173              | MLCT/LC/LLCT   |

|     |                                               |       |     |        |              |
|-----|-----------------------------------------------|-------|-----|--------|--------------|
|     | H-7→L (21%)<br>H-4→L (18%)<br>H-5→L (17%)     |       |     |        |              |
| S14 | H-2→L+2 (87%)                                 | 4.303 | 287 | 0.0059 | MLCT         |
| S17 | H-5→L+1 (40%)<br>H-7→L (19%)<br>H-1→L+3 (10%) | 4.503 | 275 | 0.063  | MLCT/LC/LLCT |

**Table S24.** Lowest-energy vertical triplet excitations of **2c** from TDDFT calculations in gas phase.

| state | Monoexcitations <sup>a</sup>                             | $\Delta E/eV$ | $\lambda_{cal}/nm$ | main character |
|-------|----------------------------------------------------------|---------------|--------------------|----------------|
| T1    | H→L (71%)                                                | 1.936         | 640                | MLCT/LC        |
| T2    | H→L+1 (41%)<br>H→L (25%)<br>H-3→L (18%)                  | 2.708         | 458                | MLCT/LC/LLCT   |
| T3    | H-1→L (44%)<br>H→L+1 (25%)<br>H-3→L (18%)                | 2.826         | 439                | MLCT/LC/LLCT   |
| T4    | H-1→L (34%)<br>H-2→L (27%)<br>H-3→L (19%)<br>H→L+1 (10%) | 2.885         | 430                | MLCT/LC/LLCT   |
| T5    | H-2→L (68%)<br>H-1→L (19%)                               | 2.962         | 419                | MLCT/LLCT      |

## 1.7. Complex 2d

**Table S25.** Fragment contributions (%; from atomic orbital contributions) to the frontier orbitals of [Pt(*p*-MeO-C<sub>6</sub>H<sub>4</sub>)(bhq)(PPh<sub>2</sub>Me)], **2d** in CH<sub>2</sub>Cl<sub>2</sub> solution.

| Energies(eV) | number  | Pt | PPh <sub>2</sub> Me | Bhq | <i>p</i> -MeO-C <sub>6</sub> H <sub>4</sub> |
|--------------|---------|----|---------------------|-----|---------------------------------------------|
| -0.154       | LUMO+6  | 4  | 49                  | 44  | 3                                           |
| -0.278       | LUMO+5  | 6  | 62                  | 29  | 3                                           |
| -0.427       | LUMO+4  | 5  | 86                  | 8   | 1                                           |
| -0.609       | LUMO+3  | 10 | 81                  | 7   | 2                                           |
| -0.859       | LUMO+2  | 3  | 94                  | 2   | 1                                           |
| -1.150       | LUMO+1  | 4  | 6                   | 89  | 1                                           |
| -1.684       | LUMO    | 3  | 2                   | 94  | 1                                           |
| -5.240       | HOMO    | 18 | 4                   | 6   | 72                                          |
| -5.612       | HOMO-1  | 30 | 3                   | 67  | 0                                           |
| -5.870       | HOMO-2  | 83 | 2                   | 8   | 7                                           |
| -6.195       | HOMO-3  | 47 | 1                   | 47  | 5                                           |
| -6.435       | HOMO-4  | 27 | 5                   | 10  | 58                                          |
| -6.520       | HOMO-5  | 28 | 14                  | 35  | 23                                          |
| -6.577       | HOMO-6  | 25 | 37                  | 36  | 2                                           |
| -6.806       | HOMO-7  | 49 | 7                   | 42  | 2                                           |
| -7.038       | HOMO-8  | 3  | 93                  | 2   | 2                                           |
| -7.101       | HOMO-9  | 4  | 92                  | 3   | 1                                           |
| -7.149       | HOMO-10 | 13 | 67                  | 8   | 12                                          |
| -7.223       | HOMO-11 | 45 | 25                  | 8   | 22                                          |
| -7.332       | HOMO-12 | 15 | 45                  | 26  | 14                                          |

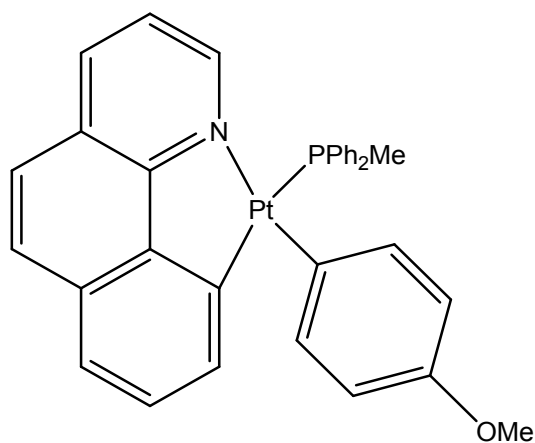



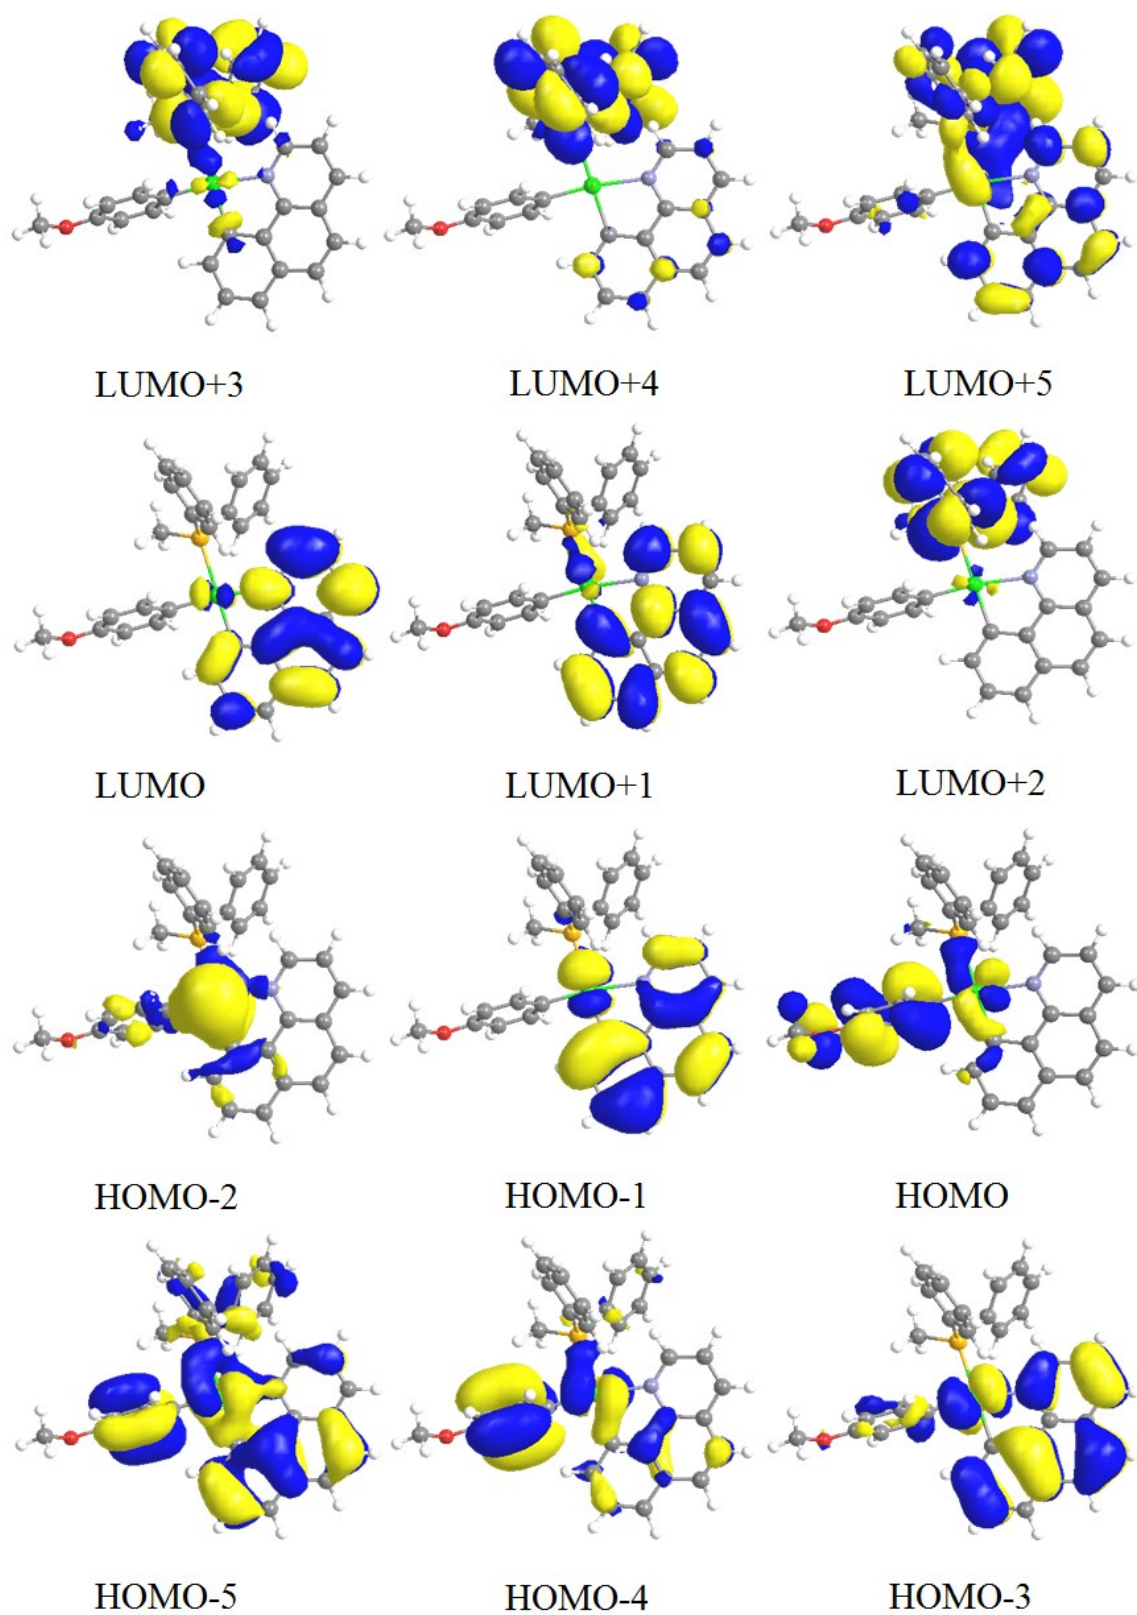

**Figure S19.** Qualitative frontier molecular orbitals for complex **2d**.

**Table S26.** Fragment contributions (%; from atomic orbital contributions) to the frontier orbitals of [Pt(*p*-MeO-C<sub>6</sub>H<sub>4</sub>)(bhq)(PPh<sub>2</sub>Me)], **2d** in gas phase.

| Energies(eV) | number  | Pt | PPh <sub>2</sub> Me | Bhq | <i>p</i> -MeO-C <sub>6</sub> H <sub>4</sub> |
|--------------|---------|----|---------------------|-----|---------------------------------------------|
| 0.093        | LUMO+6  | 4  | 12                  | 80  | 4                                           |
| -0.240       | LUMO+5  | 3  | 93                  | 4   | 0                                           |
| -0.418       | LUMO+4  | 5  | 89                  | 5   | 1                                           |
| -0.561       | LUMO+3  | 6  | 87                  | 6   | 1                                           |
| -0.850       | LUMO+2  | 3  | 92                  | 4   | 1                                           |
| -0.961       | LUMO+1  | 4  | 15                  | 80  | 1                                           |
| -1.763       | LUMO    | 2  | 1                   | 96  | 1                                           |
| -4.832       | HOMO    | 16 | 4                   | 6   | 74                                          |
| -5.104       | HOMO-1  | 21 | 2                   | 77  | 0                                           |
| -5.509       | HOMO-2  | 81 | 2                   | 10  | 7                                           |
| -5.833       | HOMO-3  | 51 | 1                   | 41  | 7                                           |
| -5.999       | HOMO-4  | 17 | 2                   | 2   | 79                                          |
| -6.182       | HOMO-5  | 61 | 2                   | 28  | 9                                           |
| -6.432       | HOMO-6  | 14 | 42                  | 42  | 2                                           |
| -6.563       | HOMO-7  | 39 | 4                   | 57  | 0                                           |
| -6.848       | HOMO-8  | 52 | 6                   | 12  | 30                                          |
| -7.050       | HOMO-9  | 1  | 96                  | 2   | 1                                           |
| -7.080       | HOMO-10 | 17 | 41                  | 17  | 25                                          |
| -7.111       | HOMO-11 | 6  | 77                  | 7   | 10                                          |



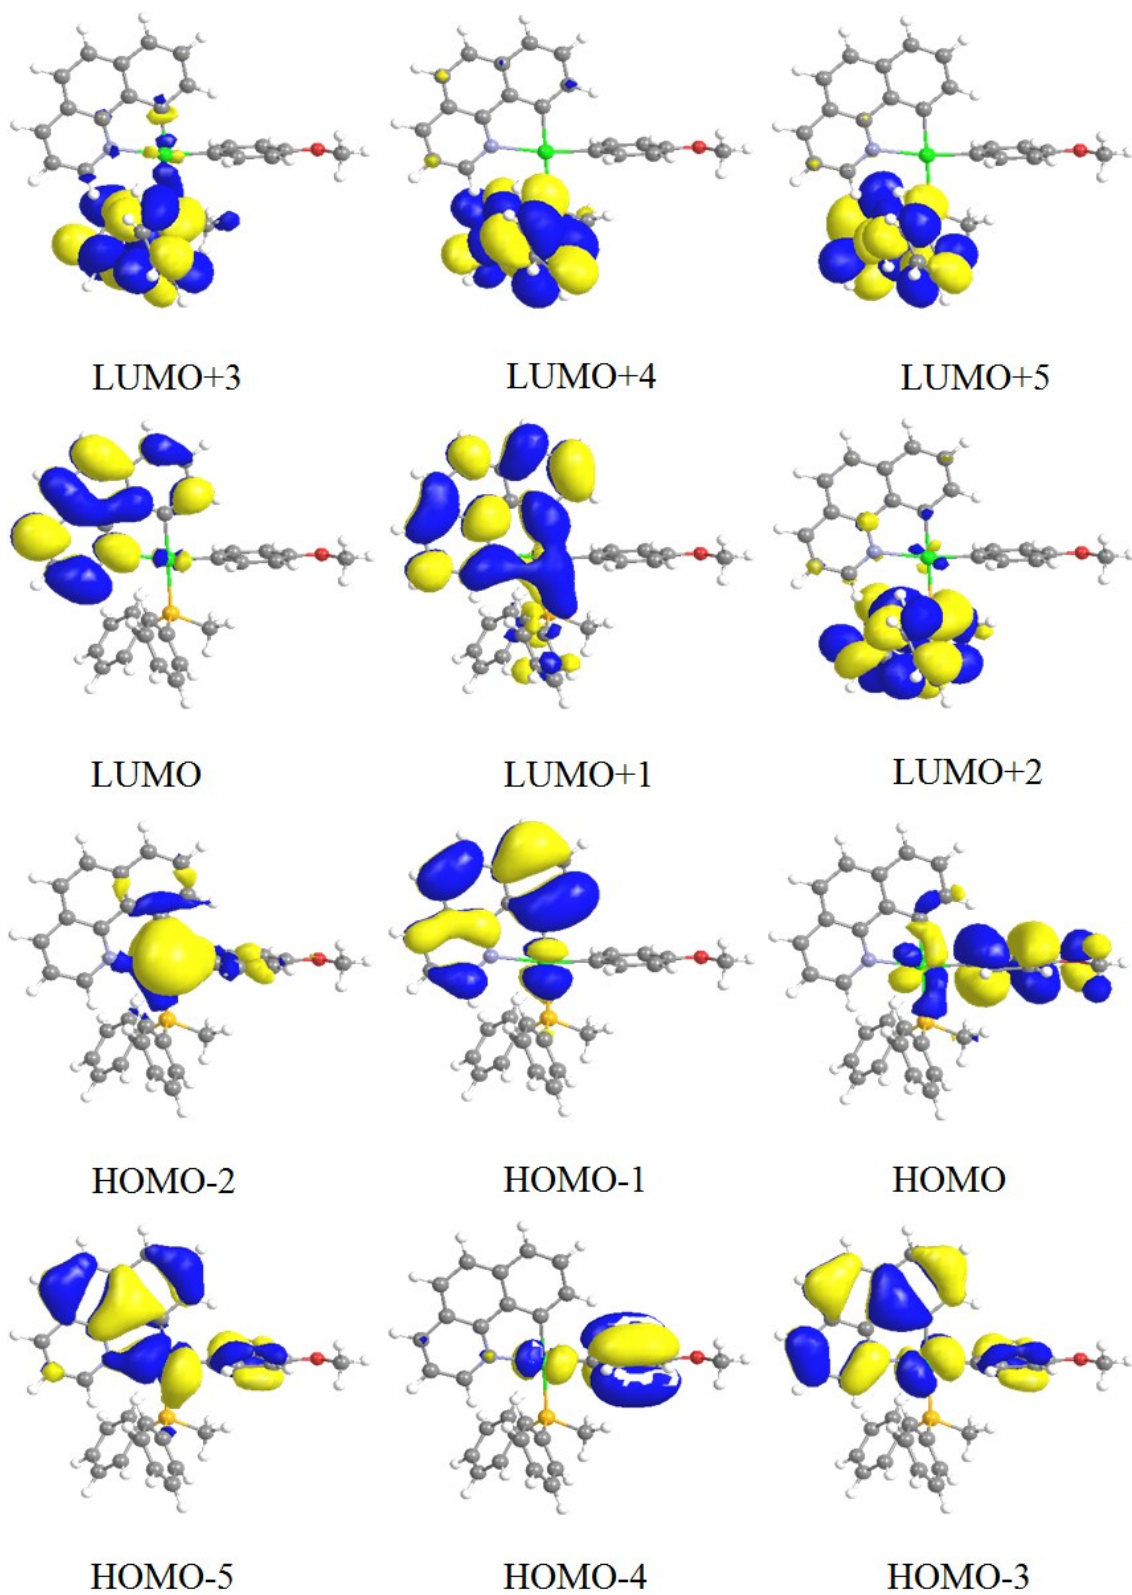

**Figure S20.** Qualitative frontier molecular orbitals for complex **2d** in gas phase.

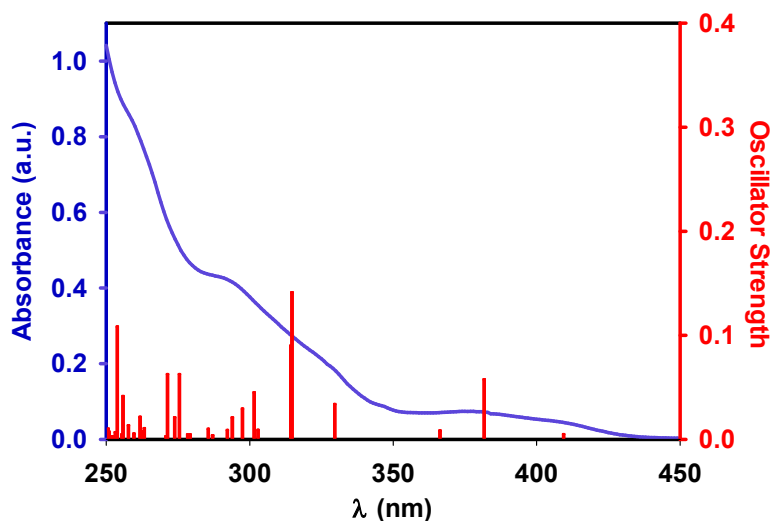

**Figure S21.** Experimental UV-vis spectra in  $\text{CH}_2\text{Cl}_2$  ( $10^{-5}$  M) at 298 K and calculated absorption spectra, showing by bars, in  $\text{CH}_2\text{Cl}_2$  for the complex **2d**.

**Table S27.** Selected vertical singlet excitations of **2d** from TDDFT calculations at the ground state geometry in  $\text{CH}_2\text{Cl}_2$  solution ( $10^{-5}$ ).

| state | Monoexcitations <sup>a</sup>                                 | $\Delta E/\text{eV}$ | $\lambda_{\text{cal}}/\text{nm}$ | oscillator strength | main character |
|-------|--------------------------------------------------------------|----------------------|----------------------------------|---------------------|----------------|
| S1    | H→L (97%)                                                    | 3.033                | 409                              | 0.0047              | MLCT/LLCT      |
| S2    | H-1→L (92%)                                                  | 3.252                | 381                              | 0.0574              | MLCT/LC        |
| S3    | H-2→L (97%)                                                  | 3.389                | 366                              | 0.0082              | MLCT           |
| S5    | H-3→L (51%)<br>H-1→L+1 (41%)                                 | 3.766                | 329                              | 0.034               | MLCT/LC        |
| S7    | H-2→L+1 (37%)<br>H-1→L+1 (26%)<br>H-3→L (21%)                | 3.944                | 314                              | 0.1411              | MLCT/LC        |
| S8    | H-2→L+1 (60%)<br>H-1→L+1 (17%)                               | 3.949                | 313                              | 0.09                | MLCT/LC        |
| S9    | H→L+3 (95%)                                                  | 4.097                | 303                              | 0.0088              | MLCT/LLCT      |
| S10   | H-4→L (36%)<br>H-5→L (32%)<br>H-3→L (11%)                    | 4.116                | 301                              | 0.045               | MLCT/LC/LLCT   |
| S11   | H-6→L (64%)<br>H-3→L+1 (18%)                                 | 4.172                | 297                              | 0.029               | MLCT/LC/LLCT   |
| S12   | H-1→L+2 (23%)<br>H-3→L+1 (23%)<br>H-6→L (22%)<br>H-7→L (18%) | 4.222                | 294                              | 0.021               | MLCT/LC/LLCT   |
| S13   | H-1→L+2 (71%)                                                | 4.247                |                                  |                     | MLCT/LLCT      |
| S16   | H-5→L (47%)<br>H-4→L (37%)                                   | 4.345                | 285                              | 0.0098              | MLCT/LC/LLCT   |
| S17   | H-5→L+1 (26%)<br>H-7→L (21%)<br>H-4→L+1 (17%)                | 4.444                | 275                              | 0.0624              | MLCT/LC/LLCT   |

|  |               |  |  |  |
|--|---------------|--|--|--|
|  | H-3→L+1 (11%) |  |  |  |
|--|---------------|--|--|--|

**Table S28.** Lowest-energy vertical triplet excitations of **2d** from TDDFT calculations in gas phase.

| state | Monoexcitations <sup>a</sup>                | $\Delta E/eV$ | $\lambda_{cal}/nm$ | main character |
|-------|---------------------------------------------|---------------|--------------------|----------------|
| T1    | H-1→L (71%)<br>H-3→L (11%)                  | 1.936         | 641                | MLCT/LC        |
| T2    | H→L (97%)                                   | 2.708         | 483                | MLCT/LLCT      |
| T3    | H-1→L+1 (44%)<br>H-1→L (24%)<br>H-3→L (20%) | 2.826         | 458                | MLCT/LC/LLCT   |
| T4    | H-3→L (51%)<br>H-1→L+1 (32%)                | 2.885         | 434                | MLCT/LC/LLCT   |
| T5    | H-2→L (94%)                                 | 2.962         | 422                | MLCT/LC/LLCT   |

### 1.8. Complex 3a

**Table S29.** Fragment contributions (%; from atomic orbital contributions) to the frontier orbitals of [Pt(bhq)(CF<sub>3</sub>CO<sub>2</sub>)(PPh<sub>2</sub>Me)], **3a** in CH<sub>2</sub>Cl<sub>2</sub> solution.

| Energies(eV) | number  | Pt | PPh <sub>2</sub> Me | Bhq | CF <sub>3</sub> CO <sub>2</sub> |
|--------------|---------|----|---------------------|-----|---------------------------------|
| -0.337       | LUMO+6  | 15 | 57                  | 25  | 3                               |
| -0.443       | LUMO+5  | 7  | 75                  | 17  | 1                               |
| -0.523       | LUMO+4  | 6  | 55                  | 39  | 1                               |
| -0.884       | LUMO+3  | 25 | 62                  | 12  | 2                               |
| -0.987       | LUMO+2  | 11 | 83                  | 6   | 0                               |
| -1.342       | LUMO+1  | 4  | 3                   | 93  | 1                               |
| -1.933       | LUMO    | 3  | 3                   | 93  | 0                               |
| -5.814       | HOMO    | 34 | 1                   | 61  | 4                               |
| -6.417       | HOMO-1  | 87 | 7                   | 4   | 1                               |
| -6.498       | HOMO-2  | 17 | 3                   | 79  | 1                               |
| -6.936       | HOMO-3  | 30 | 5                   | 37  | 28                              |
| -6.976       | HOMO-4  | 17 | 4                   | 11  | 68                              |
| -7.076       | HOMO-5  | 26 | 46                  | 11  | 17                              |
| -7.097       | HOMO-6  | 33 | 15                  | 11  | 42                              |
| -7.115       | HOMO-7  | 13 | 78                  | 4   | 4                               |
| -7.170       | HOMO-8  | 23 | 66                  | 9   | 1                               |
| -7.211       | HOMO-9  | 11 | 82                  | 5   | 2                               |
| -7.300       | HOMO-10 | 41 | 51                  | 8   | 1                               |
| -7.645       | HOMO-11 | 8  | 5                   | 34  | 53                              |

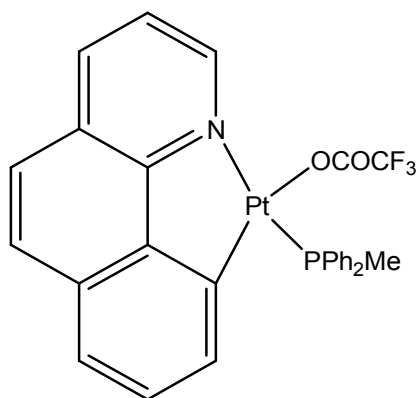

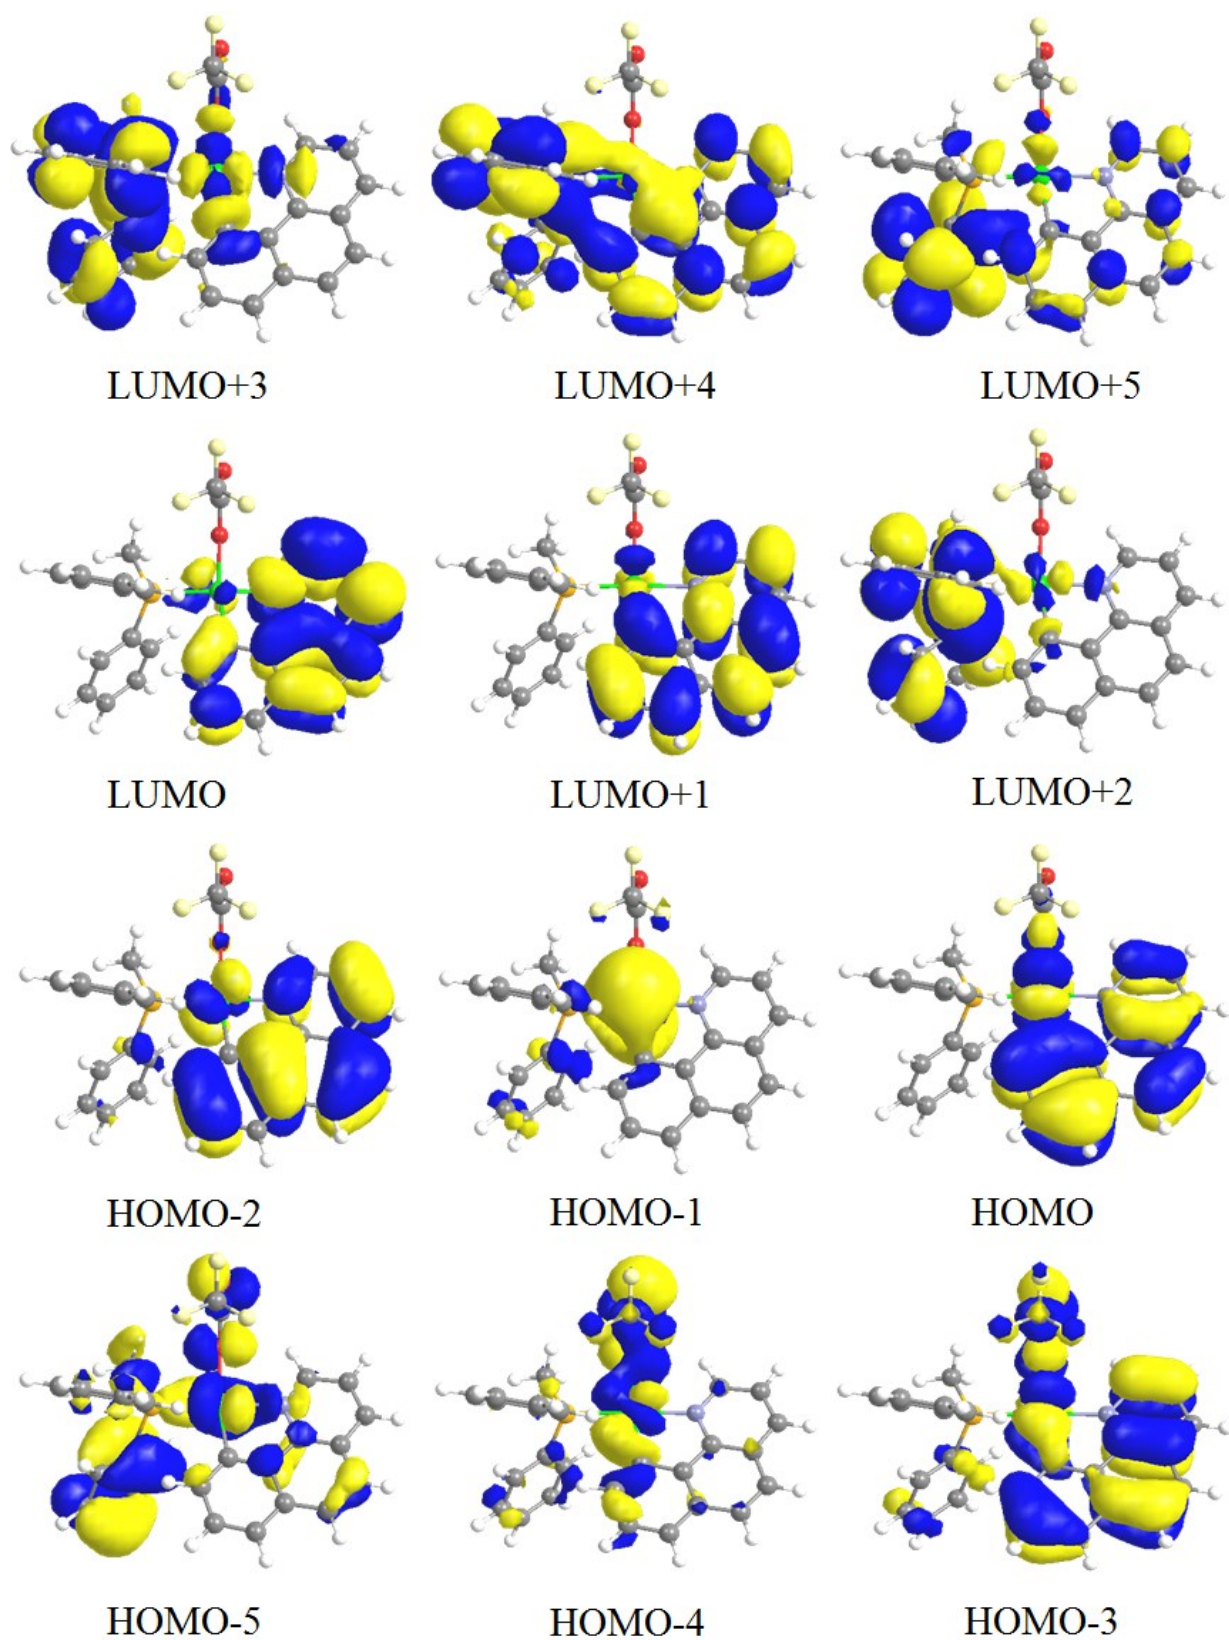

**Figure S22.** Qualitative frontier molecular orbitals for complex **3a**.

**Table S30.** Fragment contributions (%; from atomic orbital contributions) to the frontier orbitals of [Pt(bhq)(CF<sub>3</sub>CO<sub>2</sub>)(PPh<sub>2</sub>Me)], **3a** in gas phase.

| Energies(eV) | number  | Pt | PPh <sub>2</sub> Me | Bhq | CF <sub>3</sub> CO <sub>2</sub> |
|--------------|---------|----|---------------------|-----|---------------------------------|
| -0.235       | LUMO+6  | 13 | 31                  | 53  | 3                               |
| -0.416       | LUMO+5  | 4  | 81                  | 14  | 1                               |
| -0.540       | LUMO+4  | 5  | 87                  | 8   | 0                               |
| -0.843       | LUMO+3  | 20 | 70                  | 9   | 1                               |
| -1.009       | LUMO+2  | 6  | 91                  | 3   | 0                               |
| -1.331       | LUMO+1  | 3  | 2                   | 94  | 1                               |
| -2.025       | LUMO    | 5  | 4                   | 91  | 1                               |
| -5.472       | HOMO    | 33 | 1                   | 60  | 6                               |
| -6.378       | HOMO-1  | 11 | 2                   | 12  | 76                              |
| -6.419       | HOMO-2  | 27 | 2                   | 58  | 13                              |
| -6.439       | HOMO-3  | 75 | 7                   | 16  | 2                               |
| -6.583       | HOMO-4  | 25 | 2                   | 14  | 58                              |
| -6.762       | HOMO-5  | 29 | 4                   | 27  | 40                              |
| -7.100       | HOMO-6  | 48 | 34                  | 15  | 3                               |
| -7.122       | HOMO-7  | 18 | 68                  | 14  | 1                               |
| -7.190       | HOMO-8  | 9  | 83                  | 7   | 1                               |
| -7.252       | HOMO-9  | 3  | 95                  | 0   | 2                               |
| -7.317       | HOMO-10 | 15 | 78                  | 5   | 2                               |
| -7.430       | HOMO-11 | 23 | 4                   | 40  | 33                              |



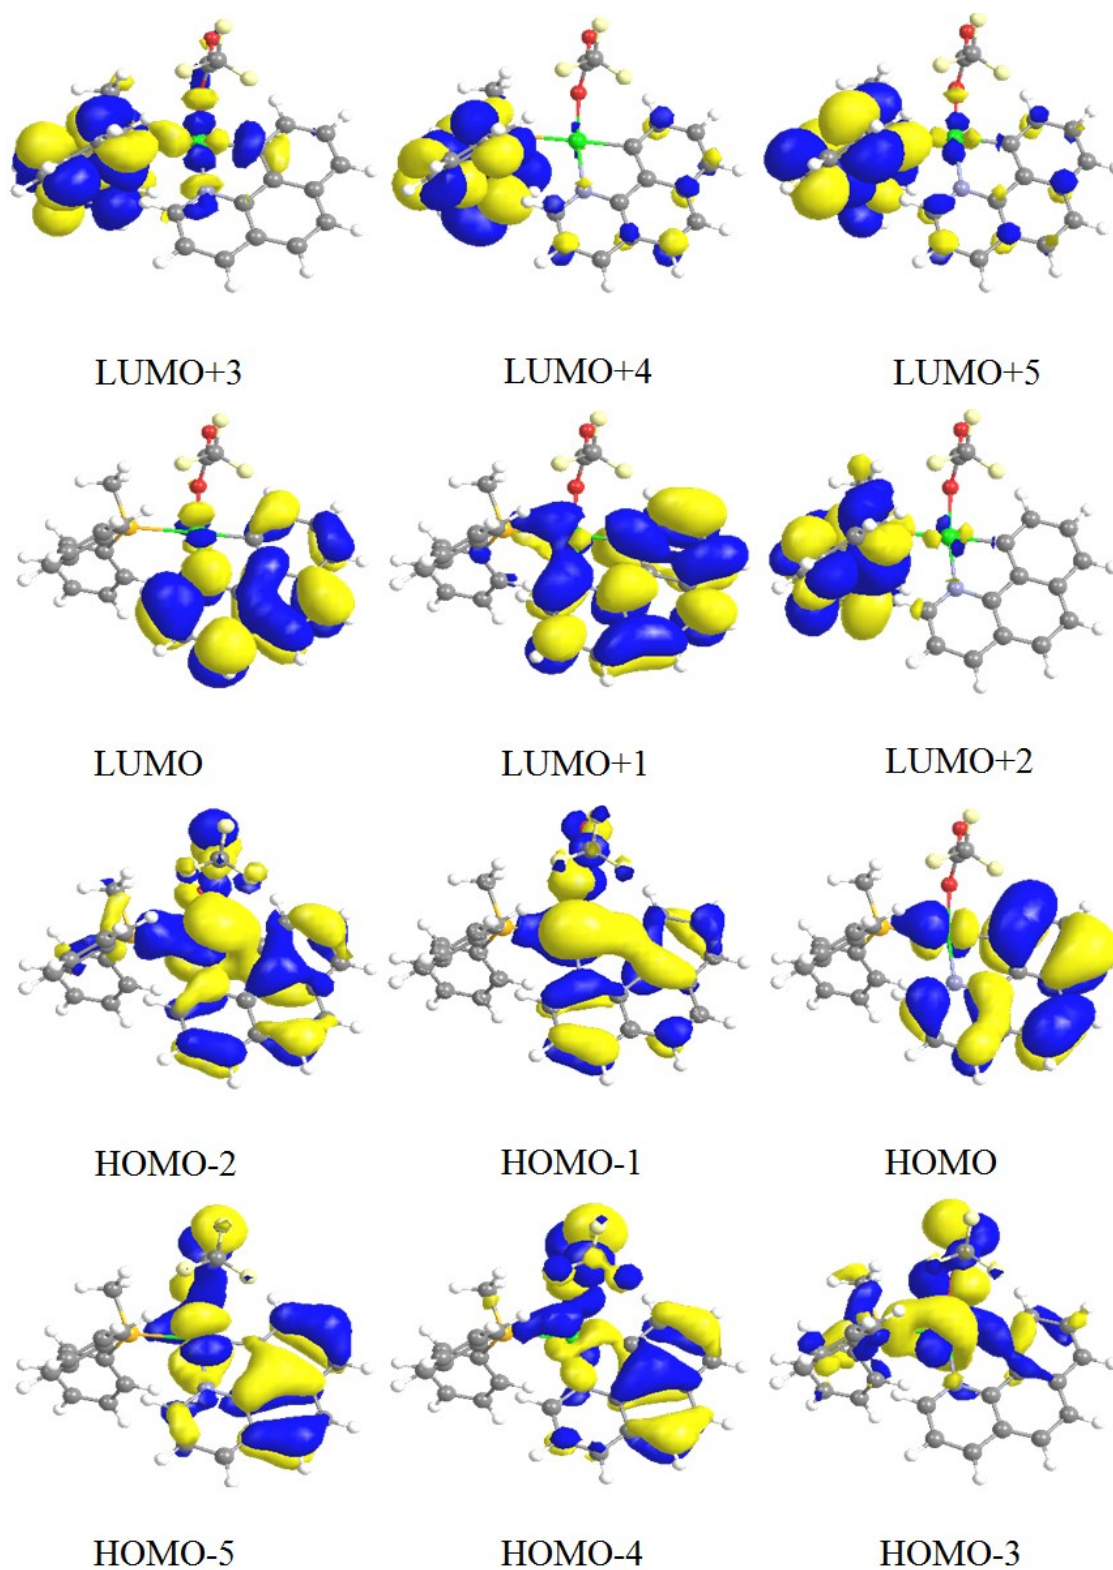

**Figure S23.** Qualitative frontier molecular orbitals for complex **3a** in gas phase.

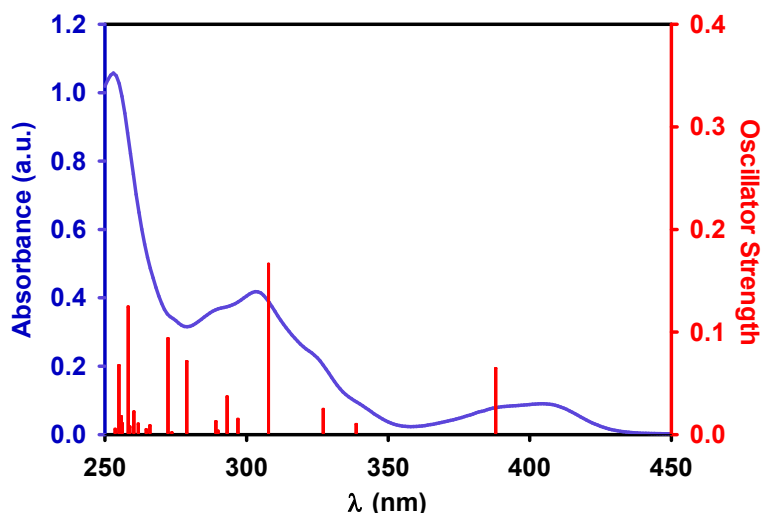

**Figure S24.** Experimental UV-vis spectra in  $\text{CH}_2\text{Cl}_2$  ( $10^{-5}$  M) at 298 K and calculated absorption spectra, showing by bars, in  $\text{CH}_2\text{Cl}_2$  for the complex **3a**.

**Table S31.** Selected vertical singlet excitations of **3a** from TDDFT calculations at the ground state geometry in  $\text{CH}_2\text{Cl}_2$  solution ( $10^{-5}$ ).

| state | Monoexcitations <sup>a</sup>                                             | $\Delta E/\text{eV}$ | $\lambda_{\text{cal}}/\text{nm}$ | oscillator strength | main character |
|-------|--------------------------------------------------------------------------|----------------------|----------------------------------|---------------------|----------------|
| S1    | H→L (96%)                                                                | 3.200                | 387                              | 0.064               | MLCT/LC        |
| S2    | H-1→L (97%)                                                              | 3.665                | 338                              | 0.0099              | MLCT           |
| S3    | H→L+1 (56%)<br>H-2→L (39%)                                               | 3.795                | 327                              | 0.0245              | MLCT/LC/LLCT   |
| S4    | H→L+3 (56%)<br>H→L+2 (18%)                                               | 3.941                | 315                              | 0.0011              | MLCT/LC/LLCT   |
| S5    | H-2→L (53%)<br>H→L+1 (37%)                                               | 4.033                | 307                              | 0.166               | MLCT/LC/LLCT   |
| S6    | H-1→L+3 (49%)<br>H-1→L+6 (13%)<br>H-1→L+2 (11%)                          | 4.179                | 297                              | 0.0148              | MLCT           |
| S7    | H-3→L (35%)<br>H-2→L+1 (31%)                                             | 4.234                | 293                              | 0.0368              | MLCT/LC/LLCT   |
| S9    | H-1→L+1 (91%)                                                            | 4.291                | 289                              | 0.0126              | MLCT           |
| S11   | H-5→L (19%)<br>H-10→L (16%)<br>H-3→L (14%)<br>H-8→L (12%)<br>H-7→L (12%) | 4.449                | 279                              | 0.0712              | MLCT/LC/LLCT   |
| S13   | H→L+4 (25%)<br>H-3→L (21%)<br>H-5→L (20%)<br>H-2→L+1 (10%)               | 4.557                | 272                              | 0.0935              | MLCT/LC/LLCT   |
| S14   | H-5→L (16%)<br>H→L+6 (13%)<br>H-6→L (11%)                                | 4.667                | 266                              | 0.0086              | MLCT/LC/LLCT   |



|     |                                                            |       |     |        |              |
|-----|------------------------------------------------------------|-------|-----|--------|--------------|
|     | H→L+3 (11%)                                                |       |     |        |              |
| S19 | H→L+4 (31%)<br>H-8→L (15%)<br>H→L+6 (10%)<br>H-2→L+1 (10%) | 4.805 | 258 | 0.1244 | MLCT/LC/LLCT |
| S22 | H→L+5 (15%)<br>H-6→L+3 (12%)                               | 4.866 | 255 | 0.0673 | MLCT/LC/LLCT |

**Table S32.** Lowest-energy vertical triplet excitations of **3a** from TDDFT calculations in gas phase.

| state | Monoexcitations <sup>a</sup>                             | $\Delta E/eV$ | $\lambda_{cal}/nm$ | main character |
|-------|----------------------------------------------------------|---------------|--------------------|----------------|
| T1    | H→L (67%)<br>H→L+1 (20%)                                 | 2.259         | 549                | MLCT/LC        |
| T2    | H→L+1 (42%)<br>H→L (30%)<br>H-2→L (11%)                  | 2.593         | 478                | MLCT/LC/LLCT   |
| T3    | H-2→L (49%)<br>H→L+1 (26%)<br>H-3→L (10%)                | 2.995         | 414                | MLCT/LC/LLCT   |
| T4    | H-3→L (76%)<br>H-2→L (10%)                               | 3.422         | 362                | MLCT/LC/LLCT   |
| T5    | H→L+3 (29%)<br>H-4→L (18%)<br>H-5→L (13%)<br>H→L+7 (11%) | 3.563         | 348                | MLCT/LC/LLCT   |

## 1.9. Complex 3b

**Table S33.** Fragment contributions (%; from atomic orbital contributions) to the frontier orbitals of [Pt(bhq)(Cl)(PPh<sub>2</sub>Me)], **3b** in CH<sub>2</sub>Cl<sub>2</sub> solution.

| Energies(eV) | number  | Pt | PPh <sub>2</sub> Me | Bhq | Cl |
|--------------|---------|----|---------------------|-----|----|
| -0.339       | LUMO+6  | 12 | 55                  | 30  | 3  |
| -0.430       | LUMO+5  | 11 | 73                  | 12  | 4  |
| -0.511       | LUMO+4  | 7  | 63                  | 30  | 1  |
| -0.909       | LUMO+3  | 28 | 52                  | 16  | 4  |
| -0.951       | LUMO+2  | 7  | 89                  | 4   | 0  |
| -1.288       | LUMO+1  | 4  | 3                   | 92  | 1  |
| -1.871       | LUMO    | 3  | 4                   | 93  | 0  |
| -5.700       | HOMO    | 36 | 1                   | 52  | 11 |
| -6.358       | HOMO-1  | 85 | 7                   | 7   | 1  |
| -6.441       | HOMO-2  | 21 | 3                   | 73  | 3  |
| -6.689       | HOMO-3  | 29 | 3                   | 6   | 61 |
| -6.746       | HOMO-4  | 23 | 1                   | 45  | 31 |
| -7.027       | HOMO-5  | 35 | 53                  | 11  | 1  |
| -7.086       | HOMO-6  | 11 | 83                  | 4   | 1  |
| -7.125       | HOMO-7  | 29 | 57                  | 12  | 1  |
| -7.177       | HOMO-8  | 7  | 90                  | 3   | 0  |
| -7.263       | HOMO-9  | 22 | 64                  | 10  | 5  |
| -7.425       | HOMO-10 | 9  | 6                   | 42  | 43 |
| -7.522       | HOMO-11 | 17 | 4                   | 37  | 43 |

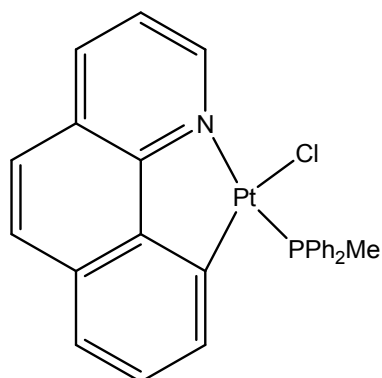

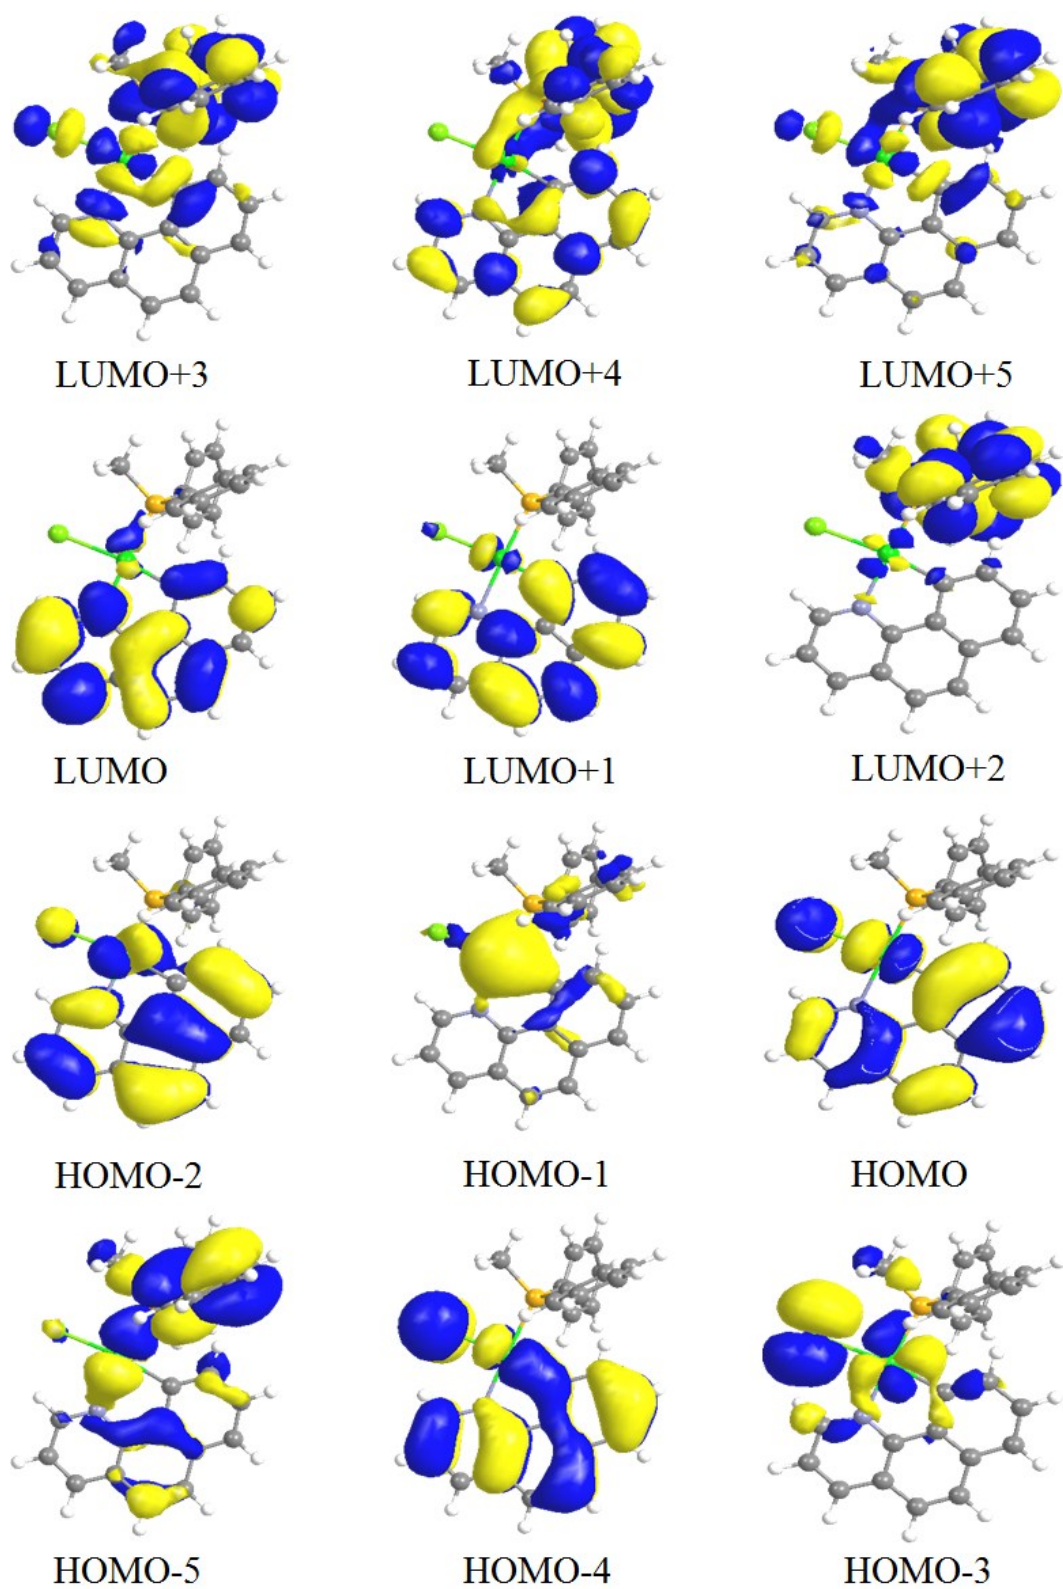

**Figure S25.** Qualitative frontier molecular orbitals for complex **3b**.

**Table S34.** Fragment contributions (%; from atomic orbital contributions) to the frontier orbitals of [Pt(bhq)(Cl)(PPh<sub>2</sub>Me)], **3b** in gas phase.

| Energies(eV) | number  | Pt | PPh <sub>2</sub> Me | Bhq | Cl |
|--------------|---------|----|---------------------|-----|----|
| -0.108       | LUMO+6  | 7  | 22                  | 70  | 1  |
| -0.302       | LUMO+5  | 7  | 85                  | 6   | 2  |
| -0.433       | LUMO+4  | 6  | 81                  | 12  | 0  |
| -0.698       | LUMO+3  | 21 | 66                  | 11  | 2  |
| -0.885       | LUMO+2  | 2  | 95                  | 3   | 0  |
| -1.182       | LUMO+1  | 6  | 6                   | 87  | 1  |
| -1.967       | LUMO    | 2  | 2                   | 96  | 0  |
| -5.236       | HOMO    | 32 | 1                   | 49  | 18 |
| -5.975       | HOMO-1  | 22 | 2                   | 49  | 26 |
| -6.030       | HOMO-2  | 23 | 3                   | 7   | 67 |
| -6.143       | HOMO-3  | 86 | 5                   | 8   | 1  |
| -6.424       | HOMO-4  | 14 | 1                   | 55  | 30 |
| -6.853       | HOMO-5  | 27 | 7                   | 35  | 30 |
| -6.873       | HOMO-6  | 43 | 10                  | 31  | 16 |
| -6.964       | HOMO-7  | 7  | 75                  | 16  | 3  |
| -7.041       | HOMO-8  | 3  | 89                  | 7   | 2  |
| -7.125       | HOMO-9  | 14 | 62                  | 15  | 10 |
| -7.130       | HOMO-10 | 13 | 56                  | 19  | 11 |
| -7.228       | HOMO-11 | 16 | 73                  | 7   | 4  |

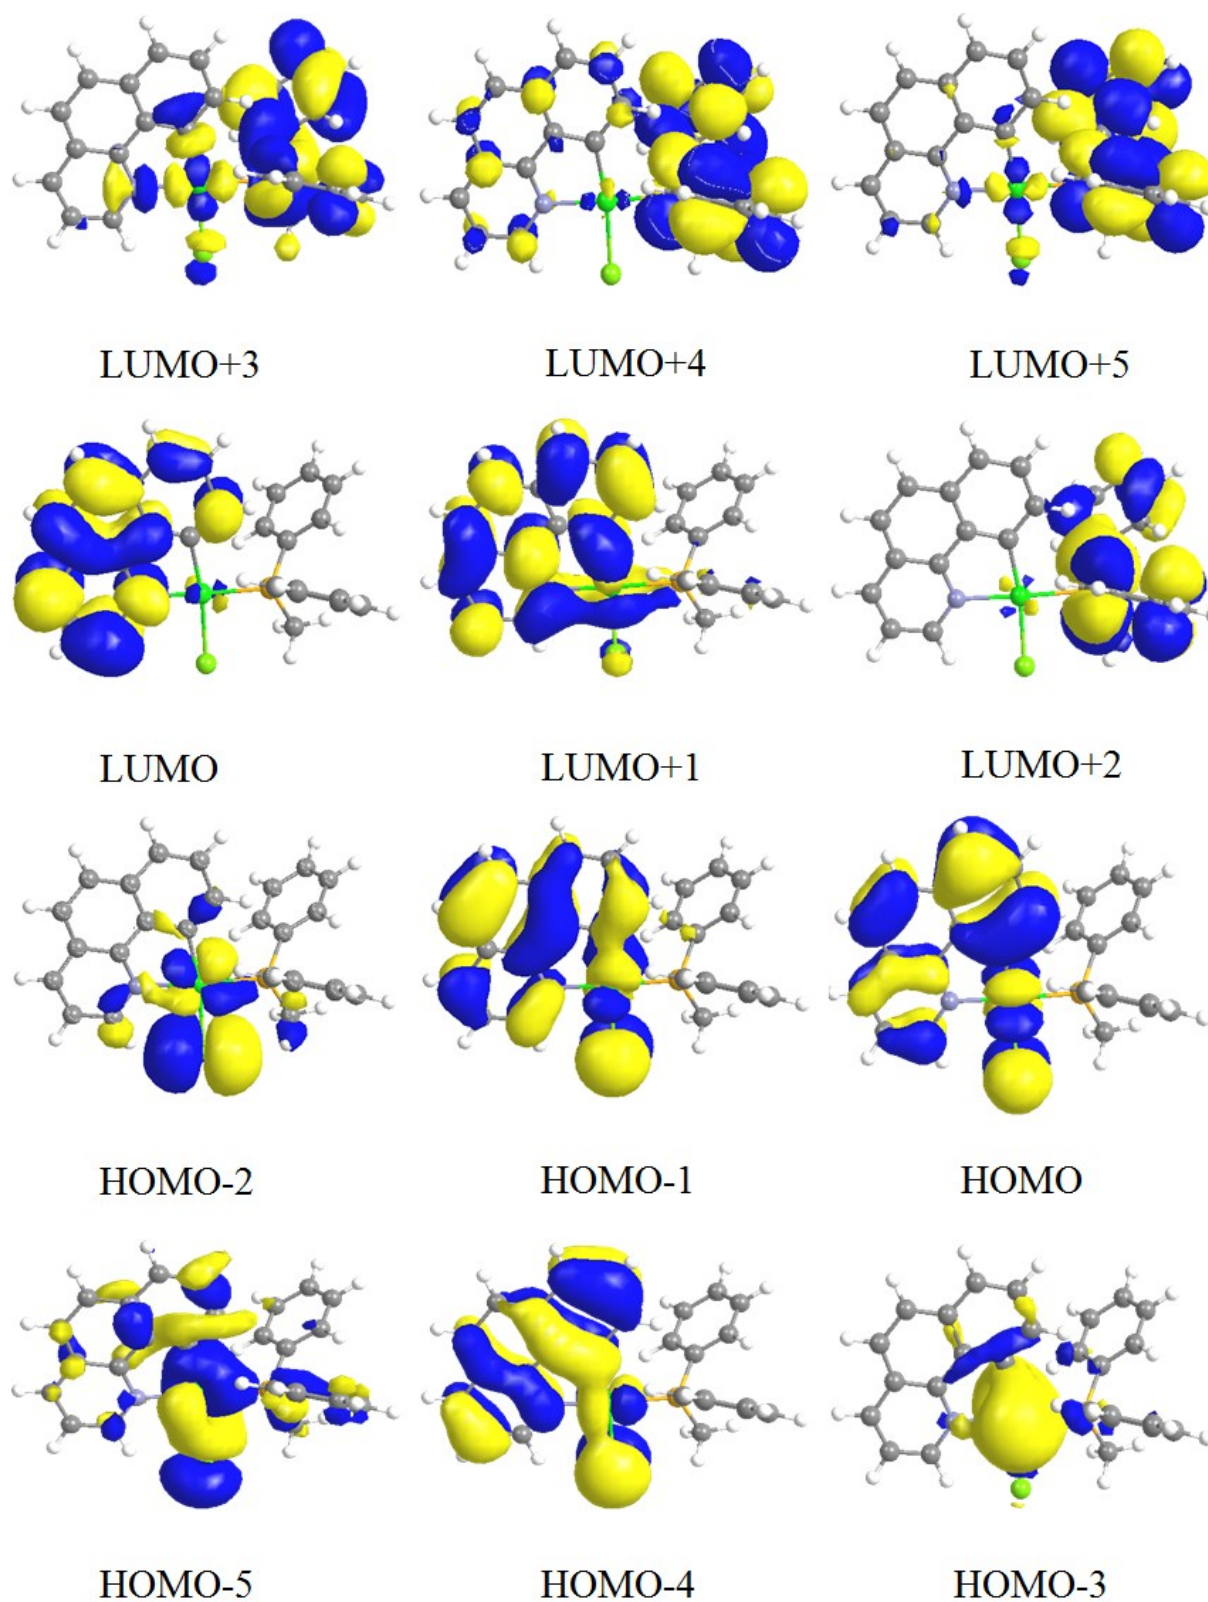

Figure S26. Qualitative frontier molecular orbitals for complex **3b** in gas phase.

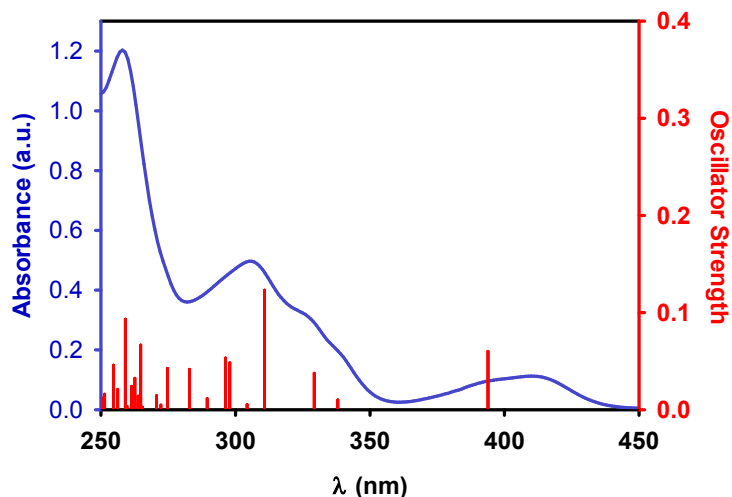

**Figure S27.** Experimental UV-vis spectra in  $\text{CH}_2\text{Cl}_2$  ( $10^{-5}$  M) at 298 K and calculated absorption spectra, showing by bars, in  $\text{CH}_2\text{Cl}_2$  for the complex **3b**.

**Table S35.** Selected vertical singlet excitations of **3b** from TDDFT calculations at the ground state geometry in  $\text{CH}_2\text{Cl}_2$  solution ( $10^{-5}$ ).

| state | Monoexcitations <sup>a</sup>                               | $\Delta E/\text{eV}$ | $\lambda_{\text{cal}}/\text{nm}$ | oscillator strength | main character |
|-------|------------------------------------------------------------|----------------------|----------------------------------|---------------------|----------------|
| S1    | H→L (96%)                                                  | 3.148                | 394                              | 0.0602              | MLCT/LC/LLCT   |
| S2    | H-1→L (93%)                                                | 3.668                | 338                              | 0.0102              | MLCT           |
| S3    | H→L+3 (70%)                                                | 3.759                | 330                              | 0.0016              | MLCT/LC/LLCT   |
| S4    | H-2→L (25%)<br>H→L+1 (66%)                                 | 3.766                | 329                              | 0.0377              | MLCT/LC        |
| S5    | H-2→L (22%)<br>H→L+1 (61%)                                 | 3.990                | 311                              | 0.1231              | MLCT/LC        |
| S8    | H-1→L+2 (22%)<br>H-2→L+2 (16%)                             | 4.163                | 298                              | 0.0484              | MLCT/LLCT      |
| S9    | H→L+2 (44%)<br>H-4→L (33%)<br>H-2→L+1 (10%)                | 4.185                | 296                              | 0.0533              | MLCT/LC/LLCT   |
| S10   | H-1→L+1 (94%)                                              | 4.284                | 289                              | 0.0116              | MLCT           |
| S11   | H-2→L+1 (26%)<br>H-5→L (22%)<br>H-4→L (15%)<br>H-7→L (10%) | 4.383                | 283                              | 0.0417              | MLCT/LC/LLCT   |
| S12   | H→L+4 (33%)<br>H-5→L (26%)<br>H→L+6 (10%)                  | 4.513                | 275                              | 0.0426              | MLCT/LC/LLCT   |

**Table S36.** Lowest-energy vertical triplet excitations of **3b** from TDDFT calculations in gas phase.

| state | Monoexcitations <sup>a</sup> | $\Delta E/\text{eV}$ | $\lambda_{\text{cal}}/\text{nm}$ | main character |
|-------|------------------------------|----------------------|----------------------------------|----------------|
|-------|------------------------------|----------------------|----------------------------------|----------------|

|    |                                          |       |     |              |
|----|------------------------------------------|-------|-----|--------------|
| T1 | H→L (60%)<br>H-1→L (23%)                 | 1.973 | 628 | MLCT/LC/LLCT |
| T2 | H→L+1 (36%)<br>H→L (35%),<br>H-1→L (16%) | 2.617 | 474 | MLCT/LC/LLCT |
| T3 | H→L+1 (40%)<br>H-1→L (37%)               | 2.842 | 436 | MLCT/LC/LLCT |
| T4 | H-3→L (82%)                              | 3.331 | 372 | MLCT         |
| T5 | H-2→L (93%)                              | 3.360 | 369 | MLCT/LLCT    |

### 1.10. Complex 3c

**Table S37.** Fragment contributions (%; from atomic orbital contributions) to the frontier orbitals of [Pt(bhq)(I)(PPh<sub>2</sub>Me)], **3c** in CH<sub>2</sub>Cl<sub>2</sub> solution.

| Energies(eV) | number  | Pt | PPh <sub>2</sub> Me | Bhq | I  |
|--------------|---------|----|---------------------|-----|----|
| -0.346       | LUMO+6  | 6  | 54                  | 39  | 1  |
| -0.472       | LUMO+5  | 15 | 72                  | 9   | 5  |
| -0.580       | LUMO+4  | 5  | 68                  | 25  | 2  |
| -0.921       | LUMO+3  | 4  | 93                  | 3   | 0  |
| -1.163       | LUMO+2  | 30 | 38                  | 25  | 7  |
| -1.343       | LUMO+1  | 10 | 8                   | 81  | 2  |
| -1.904       | LUMO    | 3  | 4                   | 93  | 0  |
| -5.680       | HOMO    | 34 | 1                   | 43  | 22 |
| -6.126       | HOMO-1  | 14 | 3                   | 6   | 77 |
| -6.231       | HOMO-2  | 44 | 4                   | 26  | 25 |
| -6.434       | HOMO-3  | 46 | 5                   | 30  | 20 |
| -6.518       | HOMO-4  | 11 | 3                   | 67  | 19 |
| -6.791       | HOMO-5  | 26 | 4                   | 36  | 33 |
| -7.030       | HOMO-6  | 37 | 51                  | 12  | 1  |
| -7.088       | HOMO-7  | 27 | 63                  | 9   | 0  |
| -7.097       | HOMO-8  | 15 | 75                  | 10  | 0  |
| -7.180       | HOMO-9  | 3  | 94                  | 3   | 0  |
| -7.206       | HOMO-10 | 27 | 35                  | 29  | 9  |
| -7.390       | HOMO-11 | 41 | 38                  | 16  | 5  |
| -7.882       | HOMO-12 | 75 | 9                   | 13  | 4  |

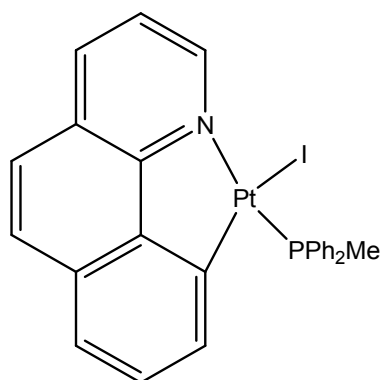



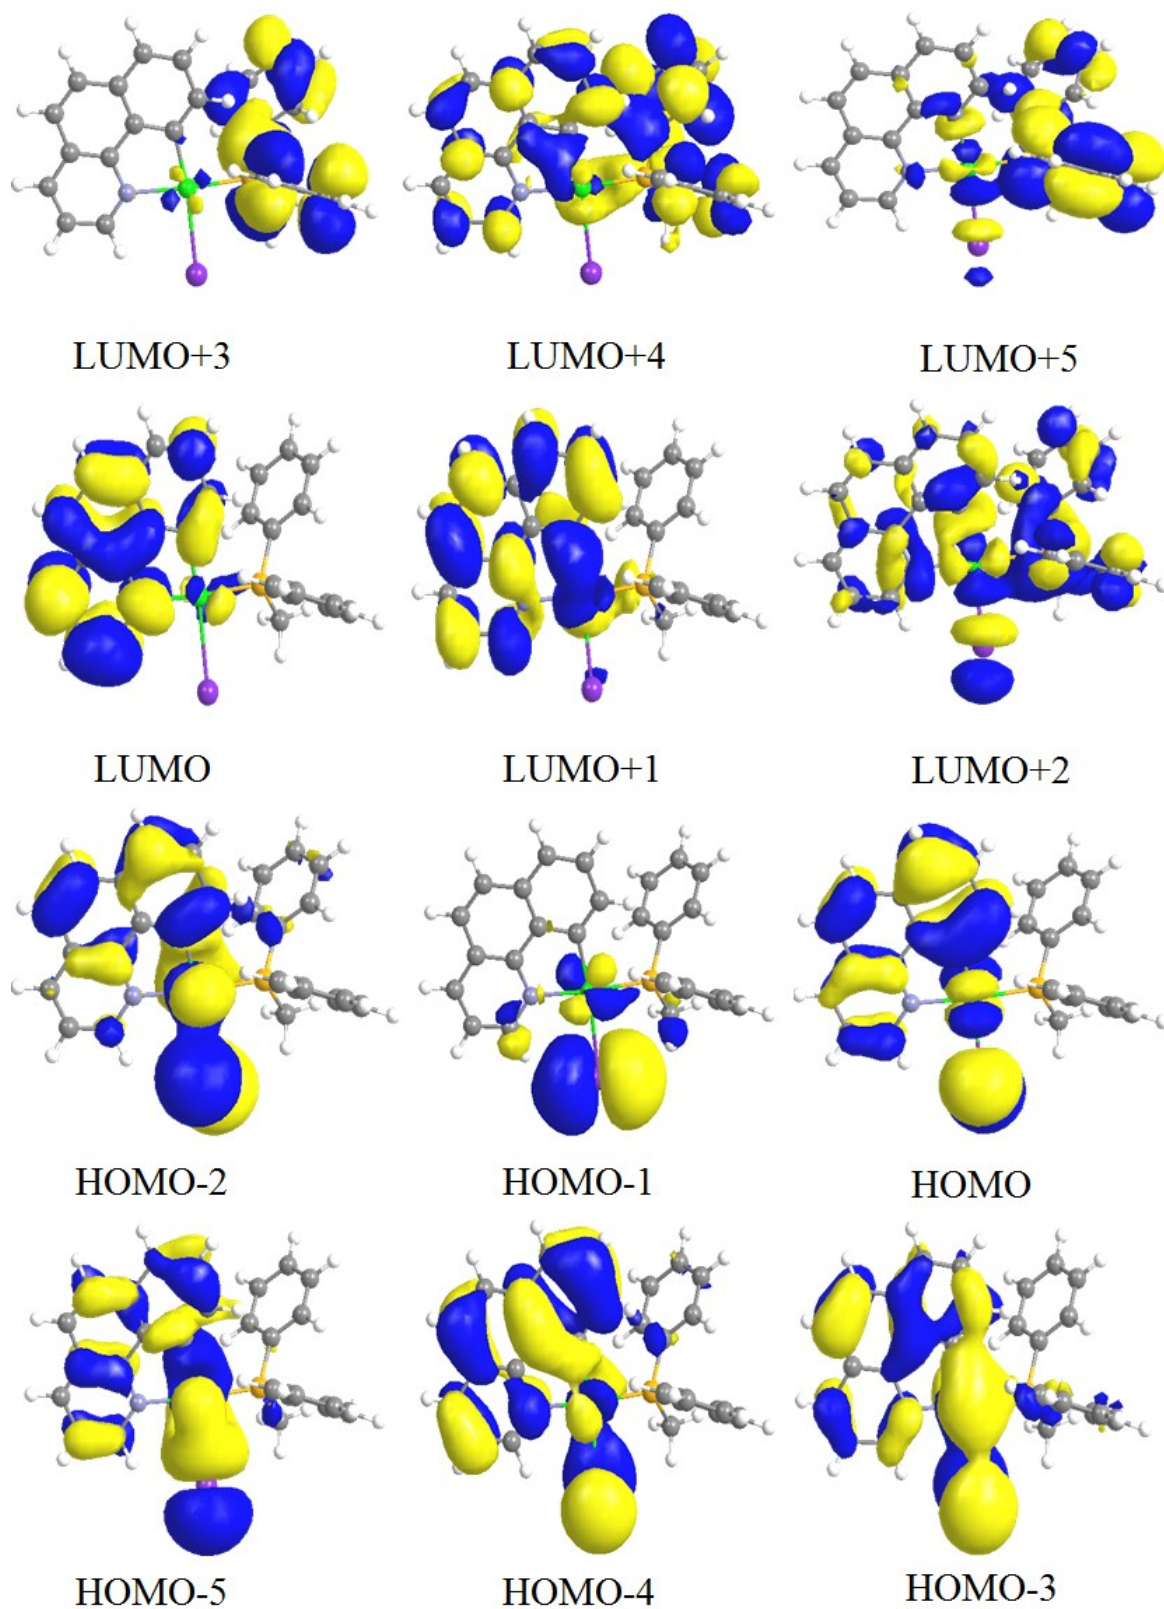

Figure S28. Qualitative frontier molecular orbitals for complex **3c**.

**Table S38.** Fragment contributions (%; from atomic orbital contributions) to the frontier orbitals of [Pt(bhq)(I)(PPh<sub>2</sub>Me)], **3c** in gas phase.

| Energies(eV) | number  | Pt | PPh <sub>2</sub> Me | Bhq | I  |
|--------------|---------|----|---------------------|-----|----|
| -0.245       | LUMO+6  | 8  | 56                  | 34  | 2  |
| -0.351       | LUMO+5  | 9  | 79                  | 7   | 4  |
| -0.501       | LUMO+4  | 6  | 77                  | 15  | 1  |
| -0.839       | LUMO+3  | 28 | 52                  | 17  | 4  |
| -0.900       | LUMO+2  | 2  | 95                  | 2   | 1  |
| -1.263       | LUMO+1  | 7  | 5                   | 87  | 1  |
| -2.040       | LUMO    | 2  | 2                   | 96  | 0  |
| -5.155       | HOMO    | 27 | 1                   | 27  | 45 |
| -5.462       | HOMO-1  | 11 | 3                   | 7   | 78 |
| -5.741       | HOMO-2  | 5  | 2                   | 63  | 29 |
| -6.096       | HOMO-3  | 40 | 4                   | 31  | 24 |
| -6.266       | HOMO-4  | 45 | 2                   | 47  | 6  |
| -6.463       | HOMO-5  | 45 | 5                   | 32  | 18 |
| -6.923       | HOMO-6  | 59 | 17                  | 24  | 0  |
| -6.993       | HOMO-7  | 29 | 44                  | 25  | 2  |
| -7.035       | HOMO-8  | 20 | 54                  | 24  | 2  |
| -7.088       | HOMO-9  | 9  | 85                  | 5   | 1  |
| -7.142       | HOMO-10 | 3  | 96                  | 2   | 0  |
| -7.246       | HOMO-11 | 19 | 76                  | 5   | 1  |

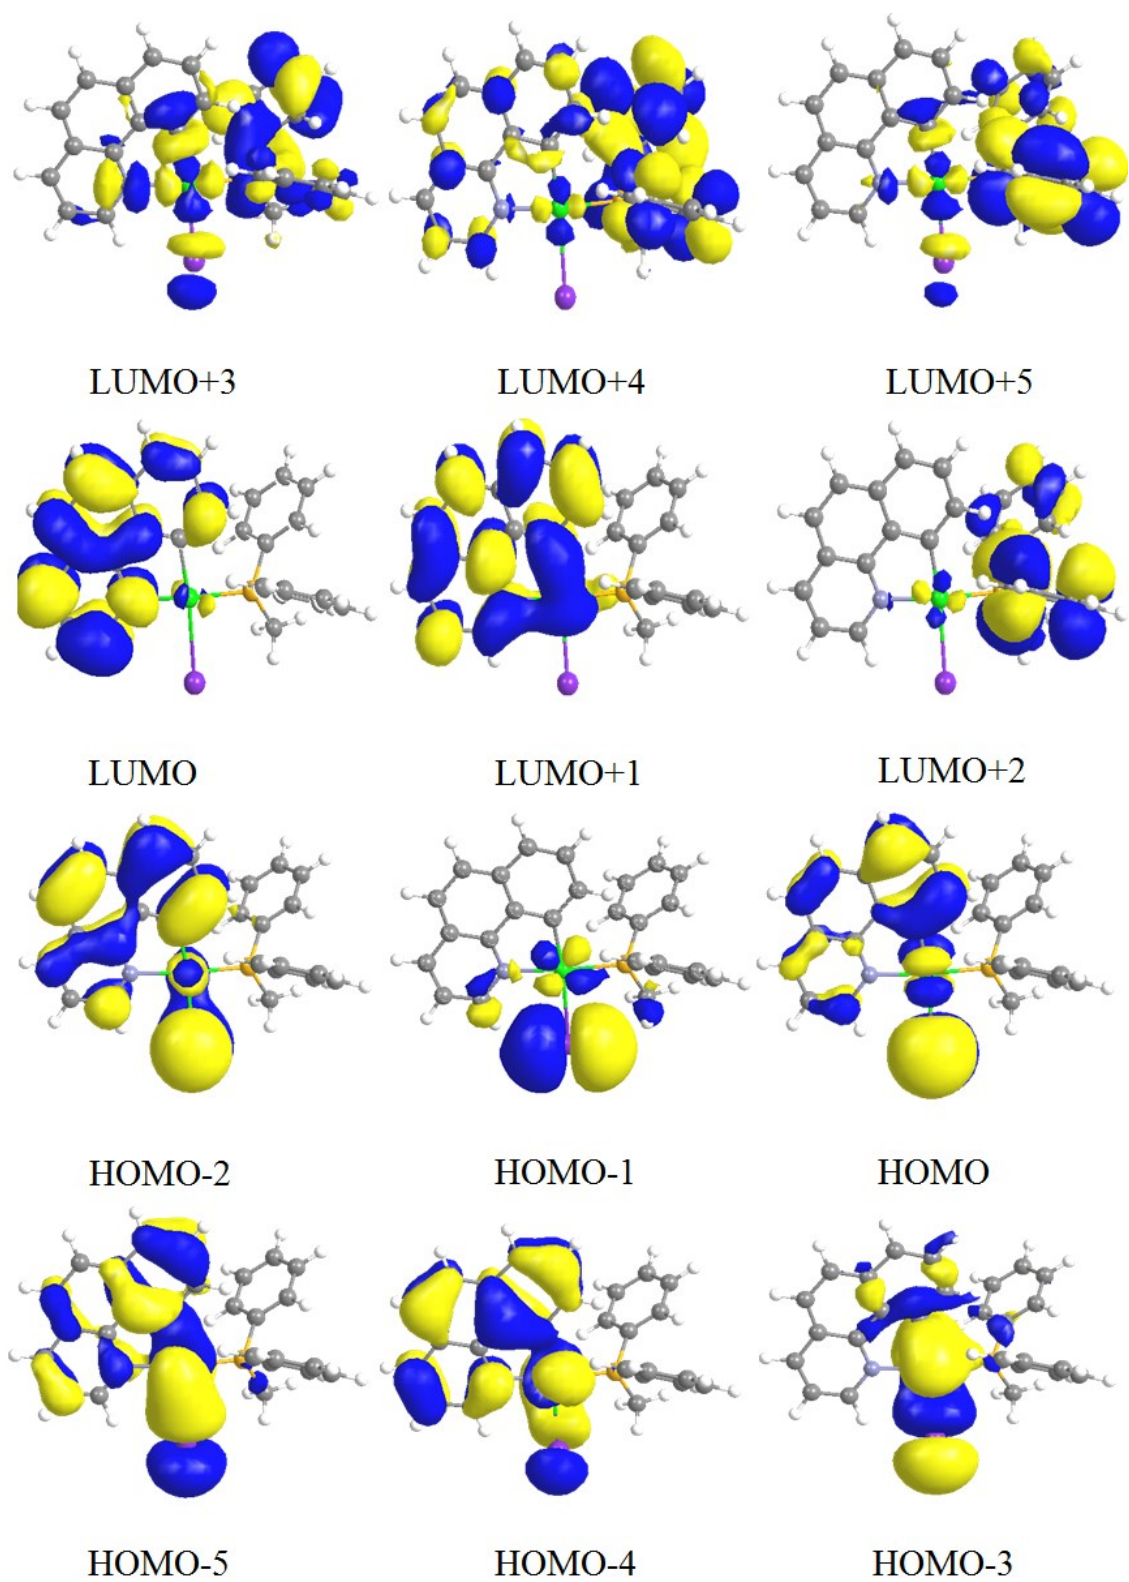

**Figure S29.** Qualitative frontier molecular orbitals for complex **3c** in gas phase.

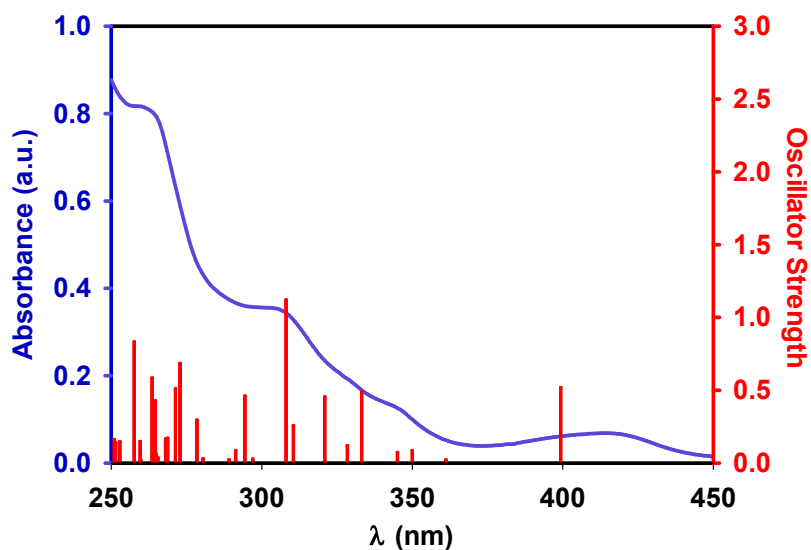

**Figure S30.** Experimental UV-vis spectra in  $\text{CH}_2\text{Cl}_2$  ( $10^{-5}$  M) at 298 K and calculated absorption spectra, showing by bars, in  $\text{CH}_2\text{Cl}_2$  for the complex **3c**.

**Table S39.** Selected vertical singlet excitations of **3c** from TDDFT calculations at the ground state geometry in  $\text{CH}_2\text{Cl}_2$  solution ( $10^{-5}$ ).

| state | Monoexcitations <sup>a</sup>                                   | $\Delta E/\text{eV}$ | $\lambda_{\text{cal}}/\text{nm}$ | oscillator strength | main character |
|-------|----------------------------------------------------------------|----------------------|----------------------------------|---------------------|----------------|
| S1    | H→L (96%)                                                      | 3.109                | 399                              | 0.0517              | MLCT/LC/LLCT   |
| S2    | H→L+2 (65%)<br>H→L+1 (19%)                                     | 3.437                | 361                              | 0.0021              | MLCT/LC/LLCT   |
| S3    | H-2→L (47%)<br>H-1→L (31%)                                     | 3.547                | 350                              | 0.0085              | MLCT/LC/LLCT   |
| S5    | H→L+1 (27%)<br>H-2→L+2 (18%)                                   | 3.726                | 333                              | 0.0491              | MLCT/LC/LLCT   |
| S6    | H→L+1 (32%)<br>H-2→L+2 (17%)<br>H→L+2 (13%)<br>H-3→L+2 (10%)   | 3.779                | 328                              | 0.0119              | MLCT/LC/LLCT   |
| S7    | H-3→L (76%)<br>H-2→L (10%)                                     | 3.868                | 320                              | 0.0453              | MLCT/LC/LLCT   |
| S8    | H-1→L+2 (54%)<br>H-1→L+1 (23%)                                 | 3.997                | 310                              | 0.0256              | MLCT/LLCT      |
| S10   | H-4→L (71%)                                                    | 4.028                | 308                              | 0.112               | MLCT/LC/LLCT   |
| S12   | H-2→L+1 (28%)<br>H-1→L+1 (18%)<br>H-5→L (13%)<br>H-3→L+1 (11%) | 4.216                | 294                              | 0.0459              | MLCT/LC/LLCT   |
| S13   | H-1→L+1 (48%)<br>H-1→L+2 (19%)<br>H-2→L+1 (18%)                | 4.260                | 291                              | 0.0084              | MLCT/LC/LLCT   |
| S18   | H→L+5 (32%)<br>H→L+4 (15%)                                     | 4.548                | 273                              | 0.0684              | MLCT/LC/LLCT   |

|     |                                                                  |       |     |        |              |
|-----|------------------------------------------------------------------|-------|-----|--------|--------------|
|     | H-6→ (14%)                                                       |       |     |        |              |
| S19 | H-3→L+1 (24%)<br>H-4→L+1 (22%)<br>H-3→L+2 (14%)<br>H-4→L+2 (13%) | 4.573 | 280 | 0.0509 | MLCT/LC/LLCT |
| S28 | H→L+6 (33%)<br>H-5→L+1 (31%)                                     | 4.816 | 257 | 0.0831 | MLCT/LC/LLCT |

**Table S40.** Lowest-energy vertical triplet excitations of **3c** from TDDFT calculations in gas phase.

| state | Monoexcitations <sup>a</sup>                | $\Delta E/eV$ | $\lambda_{cal}/nm$ | main character |
|-------|---------------------------------------------|---------------|--------------------|----------------|
| T1    | H→L (44%)<br>H-2→L (32%)                    | 1.981         | 626                | MLCT/LC/LLCT   |
| T2    | H→L (48%)<br>H→L+1 (19%)<br>H-4→L (10%)     | 2.534         | 489                | MLCT/LC/LLCT   |
| T3    | H-1→L (96%)                                 | 2.789         | 444                | MLCT/LLCT      |
| T4    | H→L+1 (39%)<br>H-2→L (22%)<br>H-2→L+1 (13%) | 2.809         | 441                | MLCT/LLCT      |
| T5    | H-4→L (49%)<br>H-2→L (31%)                  | 3.055         | 406                | MLCT/LC/LLCT   |

### 1.11. Emission spectra in dichloromethane

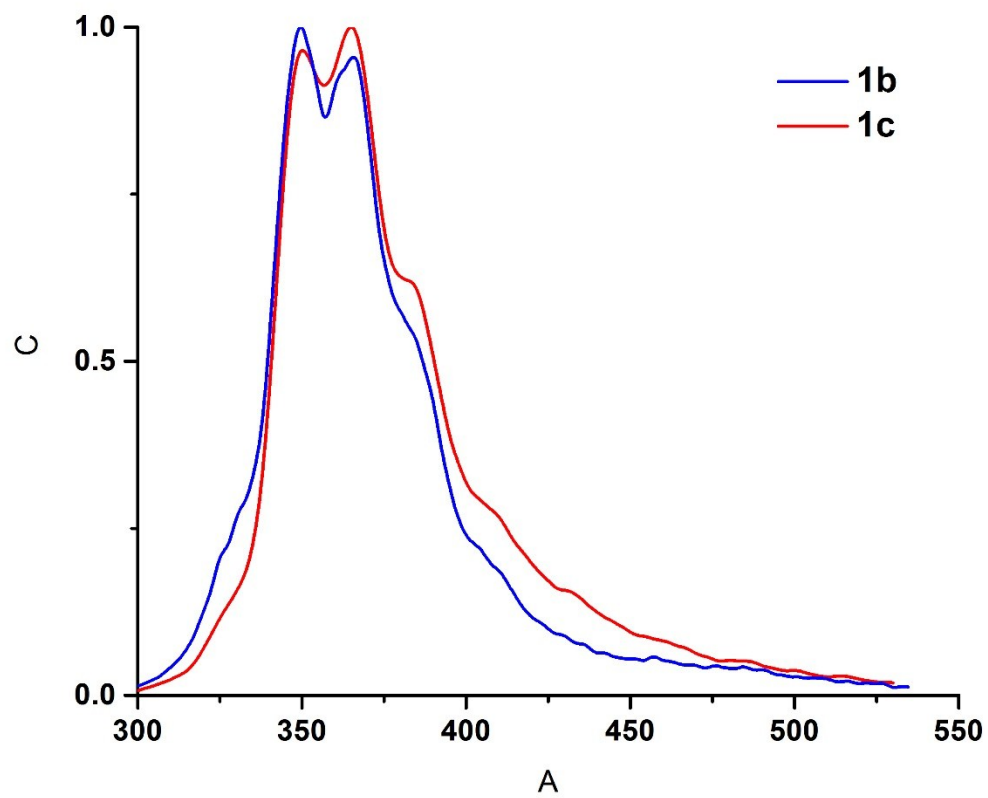

**Figure S31.** Experimental emission spectra of **1b** and **1c** in  $\text{CH}_2\text{Cl}_2$  ( $10^{-5}$  M) at 298 K.

## 2. Supplementary computational data

**Table S41.** Selected bond distances (Å) and angles (deg) of the optimized structures of Complexes **1** in the ground state.

|              | <b>1a</b> (calc.) | <b>1b</b> (calc.) | <b>1b</b> (exp.) | <b>1c</b> (calc.) | <b>1c</b> (exp.) |
|--------------|-------------------|-------------------|------------------|-------------------|------------------|
| Pt–N         | 2.237             | 2.222             | 2.145            | 2.218             | 2.145            |
| Pt–P         | 2.422             | 2.404             | 2.294            | 2.393             | 2.294            |
| Pt–C(1)      | 2.024             | 2.027             | 2.013            | 2.026             | 2.013            |
| Pt–C(2)      | 2.045             | 2.047             | 2.041            | 2.047             | 2.041            |
| C(1)–Pt–C(2) | 91.3              | 92.2              | 90.5             | 92.3              | 90.5             |
| C(1)–Pt–N    | 170.5             | 171.7             | 170.9            | 171.9             | 170.9            |
| C(1)–Pt–P    | 91.4              | 88.2              | 90.4             | 89.3              | 90.4             |
| P–Pt–C(2)    | 176.9             | 179.4             | 176.4            | 177.1             | 176.4            |
| P–Pt–N       | 98.0              | 100.0             | 98.6             | 98.7              | 98.6             |
| C(2)–Pt–N    | 79.4              | 79.5              | 80.4             | 79.6              | 80.4             |

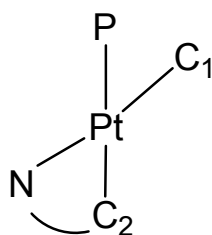

**Table S42.** Selected bond distances (Å) and angles (deg) of the optimized structures of Complexes **2** in the ground state.

|              | <b>2a</b> (calc.) | <b>2b</b> (calc.) | <b>2c</b> (calc.) | <b>2d</b> (calc.) |
|--------------|-------------------|-------------------|-------------------|-------------------|
| Pt–N         | 2.221             | 2.217             | 2.224             | 2.222             |
| Pt–P         | 2.405             | 2.406             | 2.402             | 2.403             |
| Pt–C(1)      | 2.027             | 2.028             | 2.026             | 2.029             |
| Pt–C(2)      | 2.047             | 2.047             | 2.047             | 2.046             |
| C(1)–Pt–C(2) | 92.2              | 92.2              | 92.3              | 92.3              |
| C(1)–Pt–N    | 171.7             | 171.7             | 171.8             | 171.8             |
| C(1)–Pt–P    | 88.3              | 88.2              | 88.5              | 88.6              |
| P–Pt–C(2)    | 179.4             | 179.5             | 179.0             | 179.1             |
| P–Pt–N       | 99.9              | 100.0             | 99.6              | 99.6              |
| C(2)–Pt–N    | 79.5              | 79.6              | 79.5              | 79.6              |

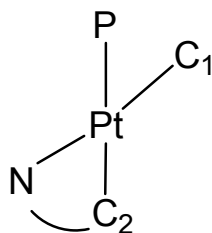



**Table S43.** Selected bond distances (Å) and angles (deg) of the optimized structures of Complexes **3** in the ground state.

|        | <b>3a</b> (calc.) | <b>3b</b> (calc.) | <b>3b</b> (exp.) | <b>3c</b> (calc.) |
|--------|-------------------|-------------------|------------------|-------------------|
| Pt-N   | 2.121             | 2.129             | 2.106            | 2.153             |
| Pt-P   | 2.292             | 2.292             | 2.224            | 2.297             |
| Pt-C   | 2.016             | 2.034             | 2.013            | 2.043             |
| Pt-X   | 2.169             | 2.470             | 2.394            | 2.835             |
| C-Pt-X | 170.7             | 171.5             | 171.3            | 170.6             |
| C-Pt-N | 81.3              | 80.7              | 81.2             | 80.3              |
| C-Pt-P | 98.9              | 97.9              | 96.0             | 96.5              |
| P-Pt-X | 90.3              | 90.6              | 92.2             | 91.1              |
| P-Pt-N | 176.1             | 178.4             | 176.7            | 175.2             |
| X-Pt-N | 89.4              | 90.8              | 90.6             | 92.3              |

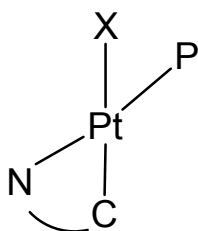

Supplement: c7nj04888b1.pdf [file c7nj04888b1.pdf]
